# Supplementary material for: Robust prognostic signatures derived from proteomic panel profiling of plasma from patients with severe COVID-19 complications
Source: Research Square preprint supplement (doi:10.21203/rs.3.rs-126482/v1), 2021-03-08
Supplement: Supplementary file 1 [file 38e72595f4293709ddb996fc.xlsx]

## Sheet: Table S1
Table S1. Data of comorbidity for patients admitted to hospital with Mild-Moderate vs Severe Covid-19 during the disease peak period (April 2020-May 2020)
Variables n (%)		Mild-Moderate	Severe	Total	p-value
		(N=50)	(N=50)	(N=100)
Diabetes mellitus (DM)	Yes	6(18.8)	26(81.3)	32	<0.001
	No	44(64.7)	24(35.3)	68
Hypertension	Yes	12(33.3)	24(66.7)	36	0.012
	No	38(59.4)	26(40.6)	64
Smoker	Ex-smoker	2(50.0)	2(50.0)	4	0.88
	Current smoker	6(46.2)	7(53.8)	13
	Unknown	18(46.2)	21(53.8)	39
	Non smoker	24(54.5)	20(45.5)	44
Dyslipidemia	Yes	4(36.4)	7(63.6)	11	0.338
	No	46(51.7)	43(48.3)	89
Metabolic Syndrome	Yes	0(0.0)	3(100.0)	3	0.242
	No	50(51.5)	47(48.5)	97
Allergy	Yes	3(37.5)	5(62.5)	8	0.715
	No	47(51.1)	45(48.9)	92
Endocrine Disorders	Yes	2(66.7)	1(33.3)	3	0.999
	No	48(49.5)	49(50.5)	97
Kidney	Yes	1(25.0)	3(75.0)	4	0.617
	No	49(51.0)	47(49.0)	96
Gastroenterology	Yes	2(66.7)	1(33.3)	3	0.999
	No	48(49.5)	49(50.5)	97
Neurology	Yes	2(100.0)	0(0.0)	2	0.495
	No	48(49.0)	50(51.0)	98
Coronary artery disease (CAD)	Yes	1(25.0)	3(75.0)	4	0.617
	No	49(51.0)	47(49.0)	96
Malignancy	Yes	1(100.0)	0(0.0)	1	0.999
	No	49(49.5)	50(50.5)	99
Affected organs
Lung	Yes	25(33.8)	49(66.2)	74	<0.001
	No	25(96.2)	1(3.8)	26
Kidney	Yes	0(0.0)	11(100.0)	11	<0.001
	No	50(56.2)	39(43.8)	89
Sepsis & Multi Organ Failure	Yes	0(0.0)	8(100.0)	8	0.006
	No	50(54.3)	42(45.7)	92
Liver	Yes	6(33.3)	12(66.7)	18	0.118
	No	44(53.7)	38(46.3)	82
Heart	Yes	0(0.0)	2(100.0)	2	0.495
	No	50(51.0)	48(49.0)	98
