# Supplementary material for: Robust prognostic signatures derived from proteomic panel profiling of plasma from patients with severe COVID-19 complications
Source: Research Square preprint supplement (doi:10.21203/rs.3.rs-126482/v1), 2021-03-08
Supplement: Supplementary file 4 [file d254b5788e6fe65346eea512.xlsx]

## Sheet: Table S2
COVID-Qatar Dataset	Olink NPX Manager 2.1.0.224
NPX data
Panel	Olink CARDIOMETABOLIC(v.3603)	Olink CARDIOMETABOLIC(v.3603)	Olink CARDIOMETABOLIC(v.3603)	Olink CARDIOMETABOLIC(v.3603)	Olink CARDIOMETABOLIC(v.3603)	Olink CARDIOMETABOLIC(v.3603)	Olink CARDIOMETABOLIC(v.3603)	Olink CARDIOMETABOLIC(v.3603)	Olink CARDIOMETABOLIC(v.3603)	Olink CARDIOMETABOLIC(v.3603)	Olink CARDIOMETABOLIC(v.3603)	Olink CARDIOMETABOLIC(v.3603)	Olink CARDIOMETABOLIC(v.3603)	Olink CARDIOMETABOLIC(v.3603)	Olink CARDIOMETABOLIC(v.3603)	Olink CARDIOMETABOLIC(v.3603)	Olink CARDIOMETABOLIC(v.3603)	Olink CARDIOMETABOLIC(v.3603)	Olink CARDIOMETABOLIC(v.3603)	Olink CARDIOMETABOLIC(v.3603)	Olink CARDIOMETABOLIC(v.3603)	Olink CARDIOMETABOLIC(v.3603)	Olink CARDIOMETABOLIC(v.3603)	Olink CARDIOMETABOLIC(v.3603)	Olink CARDIOMETABOLIC(v.3603)	Olink CARDIOMETABOLIC(v.3603)	Olink CARDIOMETABOLIC(v.3603)	Olink CARDIOMETABOLIC(v.3603)	Olink CARDIOMETABOLIC(v.3603)	Olink CARDIOMETABOLIC(v.3603)	Olink CARDIOMETABOLIC(v.3603)	Olink CARDIOMETABOLIC(v.3603)	Olink CARDIOMETABOLIC(v.3603)	Olink CARDIOMETABOLIC(v.3603)	Olink CARDIOMETABOLIC(v.3603)	Olink CARDIOMETABOLIC(v.3603)	Olink CARDIOMETABOLIC(v.3603)	Olink CARDIOMETABOLIC(v.3603)	Olink CARDIOMETABOLIC(v.3603)	Olink CARDIOMETABOLIC(v.3603)	Olink CARDIOMETABOLIC(v.3603)	Olink CARDIOMETABOLIC(v.3603)	Olink CARDIOMETABOLIC(v.3603)	Olink CARDIOMETABOLIC(v.3603)	Olink CARDIOMETABOLIC(v.3603)	Olink CARDIOMETABOLIC(v.3603)	Olink CARDIOMETABOLIC(v.3603)	Olink CARDIOMETABOLIC(v.3603)	Olink CARDIOMETABOLIC(v.3603)
Assay	PRCP	CA1	ICAM1	CHL1	TGFBI	ENG	PLTP	SERPINA7	IGFBP3	CR2	SERPINA5	FCGR3B	IGFBP6	CDH1	CCL5	CCL14	GNLY	NOTCH1	PAM	PROC	CST3	NCAM1	PCOLCE	LILRB1	MET	LTBP2	IL7R	VCAM1	SELL	F11	COMP	CA4	PTPRS	MBL2	TIMP1	ANGPTL3	REG3A	SOD1	CD46	ITGAM	TNC	NID1	CFHR5	SPARCL1	PLXNB2	MEGF9	ANG	ST6GAL1	DPP4
Uniprot ID	P42785	P00915	P05362	O00533	Q15582	P17813	P55058	P05543	P17936	P20023	P05154	O75015	P24592	P12830	P13501	Q16627	P22749	P46531	P19021	P04070	P01034	P13591	Q15113	Q8NHL6	P08581	Q14767	P16871	P19320	P14151	P03951	P49747	P22748	Q13332	P11226	P01033	Q9Y5C1	Q06141	P00441	P15529	P11215	P24821	P14543	Q9BXR6	Q14515	O15031	Q9H1U4	P03950	P15907	P27487
OlinkID	OID01272	OID01223	OID01230	OID01216	OID01291	OID01254	OID01275	OID01232	OID01255	OID01258	OID01229	OID01219	OID01264	OID01245	OID01246	OID01292	OID01262	OID01273	OID01256	OID01228	OID01225	OID01247	OID01289	OID01297	OID01238	OID01288	OID01253	OID01257	OID01249	OID01227	OID01274	OID01261	OID01284	OID01243	OID01224	OID01306	OID01280	OID01222	OID01251	OID01242	OID01265	OID01250	OID01302	OID01287	OID01218	OID01303	OID01226	OID01252	OID01266
P001	-0.10087	5.33744	4.51458	1.24535	5.96886	0.33586	0.84273	3.09375	2.21743	3.12381	4.61668	1.74147	3.91752	0.93506	5.06367	4.0224	0.30676	1.81918	-0.23159	1.59878	4.19265	1.34997	3.90392	1.51281	0.90736	1.22737	-0.03217	2.96111	6.64123	5.09129	5.01337	0.5707	-0.64342	7.02157	3.84133	3.15399	0.68404	-0.38388	3.61014	-0.52948	2.30359	4.22101	6.64627	0.86033	0.65903	2.35315	5.13565	2.42255	2.63737
P064	0.55372	5.20584	6.15166	1.99764	7.8439	0.91818	3.2801	2.00026	1.56618	5.82839	3.03292	3.81513	5.69664	1.88233	0.15387	4.19649	0.09415	2.14679	0.70884	0.76146	5.17311	2.41062	3.55455	2.60276	0.80063	0.84825	1.27112	5.4395	7.78206	3.63291	6.85716	1.08635	-0.01527	6.5937	7.59096	-0.12017	0.51327	1.44362	2.5585	-0.74683	6.72355	4.06367	1.495	3.30289	0.12089	2.58177	1.72952	0.722	3.74017
P022	-0.12762	5.86429	5.08801	1.54432	6.51598	0.28553	0.42499	2.94982	1.06048	3.19711	6.1697	1.55766	4.35774	1.40394	1.8882	4.00019	-0.55396	1.83195	-0.15591	2.85441	5.35282	2.20068	4.20645	1.57022	1.01801	0.93464	0.57559	3.87301	6.80878	5.8564	4.7443	0.22295	-0.13113	8.55328	3.54296	3.37813	1.06818	-0.41811	1.89369	-1.49938	4.46019	3.33862	6.43834	2.39366	0.50587	2.72949	4.76212	0.73904	3.25574
P029	0.13871	7.981	4.94122	2.36891	7.28547	0.53804	0.11785	2.8942	1.80277	3.07712	5.8234	2.16773	3.92912	1.2911	2.73576	3.61579	0.00354	1.72681	-0.40789	2.42596	4.68047	2.11698	3.96123	0.8313	0.92602	0.8882	0.79303	2.81298	6.7844	5.08746	4.51439	0.5817	-0.30162	7.41867	3.73779	3.2502	0.69693	0.95724	1.93785	-1.29763	7.45292	2.77797	6.02884	1.81519	0.66391	2.61974	4.97299	1.42246	3.00616
P057	0.46999	5.77874	5.42163	1.83441	6.92442	0.25032	0.64101	3.35043	1.65458	4.61126	4.80568	2.69473	3.59703	0.84181	2.86731	4.79146	-0.24151	1.8483	0.13896	2.79004	4.20851	2.11574	3.1443	1.19176	1.20822	1.7274	0.05174	3.21422	6.73832	5.49565	4.28005	0.6117	-0.7021	9.53036	3.67647	3.52838	0.00735	-0.63032	1.46085	-1.20568	2.53771	3.24568	6.74435	1.24773	0.36548	2.61487	5.10976	2.13348	3.06659
P002	-0.11328	5.4016	4.61833	1.42339	6.27111	0.50099	0.77054	3.09978	2.69154	5.47795	6.93693	1.9176	4.68831	1.33324	1.63997	4.68524	-0.20428	1.7625	-0.14276	2.62396	4.84173	2.27204	4.37965	0.71455	0.48202	0.69577	0.31888	2.6581	6.80286	5.5491	6.0379	0.21479	-0.13597	8.8066	3.0681	3.73236	0.59355	-0.90245	1.71055	-1.71175	2.34426	2.28778	5.63418	1.39389	0.25225	2.20553	5.01564	1.19368	3.21131
P014	-0.40162	4.55766	4.82596	1.20343	6.48577	0.12815	-0.04982	2.33709	1.33701	2.95052	5.67503	2.26327	3.23426	0.80608	0.62329	3.73277	-0.27418	1.53719	-0.43333	2.15499	4.4437	1.7821	3.11545	1.30006	0.60425	0.63048	-0.08312	3.04191	6.84731	6.00254	3.26096	0.32397	-0.56644	8.93682	3.2495	3.54826	1.13602	-0.87945	1.52037	-1.34784	3.52114	2.73009	5.11393	1.07404	0.5219	2.36281	4.37945	1.18452	2.22496
P051	0.2351	4.98486	5.52368	1.47773	6.37885	0.43158	0.84301	2.77876	2.63954	5.76424	5.84728	2.25768	3.83049	2.23313	3.65889	4.86281	-0.28489	1.90436	0.0558	3.23647	4.12495	1.88344	3.69791	1.25182	0.95243	0.94217	0.34833	3.28857	6.62485	5.97782	4.18633	0.37645	-0.46179	9.94604	4.36799	4.50544	0.9721	0.00417	2.19925	-1.59388	2.67896	3.07613	6.59205	1.32472	0.42115	2.70345	4.95953	1.55638	2.91331
P082	0.19423	4.13252	5.60745	2.90035	6.97777	0.2519	0.9274	2.54866	1.69561	3.5041	5.92353	2.59074	4.68722	1.79796	2.4586	5.42243	-0.28793	1.90907	0.18519	3.41096	5.5527	1.90655	4.84693	1.21604	1.14861	1.37685	0.34696	3.60701	6.71732	6.14619	4.14969	0.5012	-0.60888	8.63338	4.6634	4.50608	0.09819	-0.87207	2.29239	-0.68423	5.32273	3.14421	7.68043	2.421	0.65298	2.6383	5.86515	2.57438	2.76832
P120	-0.15177	7.83612	3.79629	1.83268	6.1724	-0.06285	0.55344	2.19865	1.95171	4.97246	6.31726	1.14681	3.65241	0.64144	0.776	3.17709	-0.24271	1.28292	-0.31763	1.98546	3.42166	2.22898	3.90344	0.61745	0.3734	0.51384	-0.11797	2.04002	6.07612	5.53851	5.34097	0.14382	-0.42072	8.49434	2.31094	3.24596	0.63546	0.34424	1.34971	-1.42672	1.17365	1.51977	5.34773	1.19292	-0.00914	1.89449	4.51256	0.73714	2.95065
P066	0.61947	11.9564	5.41928	1.19348	6.32088	0.85053	0.78774	2.14659	1.90999	3.79343	6.32117	1.372	3.78137	1.729	4.00425	4.75582	0.08534	1.65206	0.42961	3.22723	5.36426	2.13851	3.86822	1.44837	1.42551	0.76232	1.01371	3.06293	6.52908	5.76598	3.34258	1.14257	-0.93356	9.73424	3.95562	4.02764	0.52755	4.85767	1.92801	-0.45657	4.39213	4.2176	7.0815	2.06843	1.14445	2.45507	4.79892	3.40457	2.87674
P072	-0.10984	4.33884	4.65684	1.05967	6.23073	0.11868	0.52658	3.10489	1.77085	6.64438	6.18744	2.88264	3.77932	0.44029	2.55275	4.82341	-0.35088	1.74925	0.14163	2.2727	4.38104	1.83152	3.42084	0.75542	0.59024	1.16976	0.67649	2.55465	6.88072	5.11072	4.75032	0.25187	-0.2963	6.65188	3.30293	3.63812	0.10058	-0.31236	1.46406	-1.18775	2.27977	2.44165	6.11064	1.03406	-0.00362	2.23122	5.36508	1.62641	2.58347
P143	-0.10414	6.17982	4.0173	1.64303	6.02032	0.22429	0.92152	1.88572	1.26324	5.84554	5.8218	2.2891	3.40807	1.24436	0.84462	3.99343	-0.19572	1.34024	0.09614	2.65046	3.59195	1.96527	3.68666	0.85612	0.77141	0.82471	0.79437	2.42037	5.82556	4.2024	5.87688	0.29002	-0.41053	4.56891	2.39026	3.83789	0.02887	-0.31046	1.33972	-1.35382	1.77286	1.96474	5.26085	1.61024	0.02623	1.53531	4.71499	0.91987	2.42711
P077	-0.18083	5.07508	3.87431	1.48065	5.84155	-0.18184	0.15503	2.44768	1.29783	4.78338	5.71524	2.2605	3.29453	0.11083	1.35467	3.86404	-0.54543	1.05384	-0.39431	1.54975	3.15925	1.81817	3.15253	0.53595	0.2696	0.48448	-0.1945	2.19159	5.79962	4.4822	4.16036	0.29485	-0.65859	6.64252	2.0887	2.76682	-0.16263	-0.58009	1.13285	-1.3665	2.33318	1.45022	4.64002	1.01384	-0.20361	1.85978	4.22396	0.9596	2.83909
P003	-0.11049	5.46131	4.3972	1.67747	6.86417	0.53609	0.88933	2.66092	2.82981	5.10849	6.64552	2.11847	3.77549	0.9836	4.73615	4.64546	-0.37501	1.74946	-0.11068	2.69329	3.85378	1.85027	4.05319	0.78996	0.69815	0.63518	0.6267	2.73699	6.73373	5.08918	4.88106	0.30633	-0.15115	10.018	2.46645	3.38196	0.81621	-0.88902	1.03852	-1.20087	2.3292	2.36621	5.73423	1.3428	0.22429	2.33598	4.97462	1.1455	2.77918
P004	0.40981	6.54751	5.38831	1.36211	7.44868	0.74545	0.70792	3.68674	2.75313	5.44562	7.04404	2.48177	3.9141	1.19022	5.16294	4.89546	0.15243	1.98211	0.07268	2.53681	4.49955	1.60995	4.55893	1.72358	0.72053	1.15869	0.2655	3.36463	7.2303	5.47958	5.13986	0.44991	-0.26965	8.46063	3.58727	3.98701	0.73778	-0.15873	1.86724	-1.84458	2.6305	2.9307	5.72365	1.17292	0.70346	2.33297	5.11774	1.64799	2.83056
P005	-0.30624	5.92621	4.17636	1.1295	5.95197	0.20942	0.90369	2.91055	2.11259	5.68485	6.22769	1.85798	3.79575	0.8775	5.0263	4.8139	0.54201	1.45269	-0.44236	2.32322	3.97511	1.46003	3.72893	0.81505	0.50257	1.0273	0.39925	2.01787	6.92868	5.27901	4.65477	0.40988	-0.20147	6.53925	3.00536	3.68677	0.68367	-0.30581	2.6421	-0.82121	2.00129	2.99757	5.75171	1.08625	0.35498	1.62392	4.54129	1.14529	2.60074
P006	-0.1069	6.96712	4.66024	1.35456	6.40911	0.46876	0.88624	3.37074	1.32722	5.09643	6.71601	1.50178	4.07627	1.20713	7.41564	5.29282	0.62256	1.64492	-0.0628	1.98726	4.34212	2.00141	4.23049	0.68503	0.50311	0.68518	-0.14199	2.69413	6.69489	5.72438	5.42187	0.03135	-0.38704	6.2675	3.45632	3.48208	0.68022	0.1475	1.47313	-1.43713	2.08743	2.53783	5.6284	1.20442	0.35281	2.01884	7.0958	1.60076	3.02964
P007	-0.09543	6.12212	4.7632	1.28265	6.37108	0.46876	0.52651	2.91511	2.44123	5.27841	5.95113	0.63349	3.56153	0.90585	0.87721	4.61426	-0.34807	1.67128	-0.41957	1.50987	3.93297	1.84326	3.43817	0.50781	0.46605	0.38064	-0.20807	2.58243	6.77632	4.80663	4.0259	0.06417	-0.28977	8.50293	2.61793	3.34893	0.67482	-0.31275	1.42893	-2.29279	1.61772	2.09011	5.30781	1.29391	0.10055	2.22935	4.84694	0.38464	3.219
P008	-0.01259	4.95895	5.23674	1.10197	6.91956	0.59008	1.08667	2.72142	0.30166	4.63153	6.51032	2.27981	4.35206	1.6532	1.55515	4.57936	-0.04743	1.7864	-0.19227	2.54873	5.13467	1.43534	3.52379	1.14768	0.98118	1.36018	0.71264	3.129	6.85905	5.86642	4.92299	0.5944	-0.48689	7.96271	3.83387	2.85147	0.97535	-0.81618	1.6946	-1.38097	5.07984	2.90963	5.63417	2.03108	1.17331	2.2434	4.41877	1.75107	2.37736
P009	-0.03066	4.57228	5.83523	1.47265	6.28457	0.65059	1.39125	2.5663	2.34415	3.92903	7.30378	1.72864	7.69409	3.16249	0.8608	6.31214	-0.20966	2.11565	0.26423	3.12971	9.04296	1.65004	4.78506	1.1093	1.1631	1.5263	1.00344	3.56617	6.35409	5.28675	5.95238	1.13304	0.21466	8.31947	3.86866	4.96056	2.03415	0.12753	2.90025	-1.04324	6.26444	2.35569	5.97154	2.95304	0.91071	2.42264	5.81076	1.24354	2.74056
P010	-0.47299	4.50697	5.06694	0.69545	6.9024	0.5504	0.35672	2.7334	0.82213	3.69366	6.38381	1.73775	4.12207	1.27145	2.1331	5.16719	-0.27714	1.41239	-0.3968	3.30786	5.30441	1.83739	3.65944	0.36298	1.27188	1.36257	0.3495	3.17542	6.82354	6.17122	3.76103	0.27882	-0.74604	7.47143	3.03217	4.23888	0.70518	-0.96139	1.48362	-1.49005	4.79816	3.34453	6.90707	1.67462	0.91612	2.32644	4.42796	1.856	3.03457
P011	-0.28034	4.91802	5.89767	1.17958	6.9467	0.45674	1.17881	2.81447	1.79475	3.88009	7.38205	2.94513	7.05194	3.34917	1.41683	5.86621	-0.09133	1.95168	-0.00834	3.22718	8.90989	1.71352	4.71796	1.35181	1.33596	1.33595	0.13636	4.32442	6.77818	5.93364	4.9378	0.193	-0.0615	7.92184	4.32958	4.98387	4.5576	0.28413	2.73583	-1.27682	6.82176	4.24543	6.42768	3.42127	1.09592	3.00211	5.30224	1.88216	3.31114
P012	0.09716	4.80219	4.9292	1.33996	6.61596	0.17117	0.75286	2.71419	0.3331	3.80044	5.02106	1.62712	4.05861	1.19045	3.17725	5.15017	0.0287	1.92445	-0.42674	2.56586	4.93057	1.96771	3.91004	1.50778	0.86832	0.60772	-0.15671	3.73549	6.74684	5.8044	4.57494	0.45556	-0.51716	7.22483	4.28145	3.46361	0.96663	-0.67343	1.85804	-1.07817	2.74682	3.3445	6.63538	1.37537	0.72422	2.30471	5.15647	2.11434	2.73193
P013	-0.19001	6.51429	4.07884	1.31966	6.47806	0.18217	0.2088	2.90166	2.14739	3.96773	5.62128	1.60865	3.19587	0.66505	2.75551	4.39072	0.12988	1.34073	-0.31347	1.9883	3.68128	1.77931	3.38612	0.81597	0.66916	0.37505	0.23922	2.38209	6.29292	5.3113	4.23304	0.29126	-0.6489	6.90353	2.95191	3.11874	1.0548	-0.26169	1.22768	-1.41522	1.9087	2.12792	4.97388	1.30222	0.41875	1.83764	4.44786	0.98947	2.8553
P015	0.10595	4.95224	5.8618	1.31785	7.36572	0.32898	0.67149	2.94427	1.67064	4.39142	4.51317	1.98015	4.03205	1.28887	2.86161	4.77416	0.6579	1.72843	-0.12381	2.22348	4.88577	1.42436	3.19089	1.54326	1.1842	1.06544	0.05217	3.93772	6.80651	5.26786	3.93895	0.51543	-0.44108	9.62999	4.40876	5.24569	1.01975	-0.74032	1.6199	-1.44193	3.81119	4.35387	7.25412	1.13683	0.94013	2.60944	5.50236	3.21371	2.93634
P016	-0.16126	6.48664	4.91157	2.59293	6.39516	0.19098	0.42463	3.20507	1.82715	4.78773	6.12115	1.36932	3.92298	1.13266	4.19988	5.1435	-0.17887	1.40169	-0.19756	2.62376	4.36068	1.74517	4.88602	1.12594	0.80412	0.69289	-0.02403	2.0338	6.21661	5.97421	4.31805	0.28279	-0.55926	8.84507	3.4424	3.43531	0.7724	-0.36794	1.83683	-1.74981	1.41533	2.47107	6.18293	1.27152	0.22176	2.73875	5.28492	1.87229	2.98367
P017	-0.01344	5.02403	5.35356	1.3778	6.17346	0.04689	0.6092	2.68448	0.98995	4.0663	4.63479	2.54771	3.72844	1.25471	2.35658	5.03465	-0.05497	1.70146	-0.28011	1.75472	4.4822	1.726	3.19563	1.49174	0.94198	1.08193	-0.31915	3.06011	6.56161	5.96494	3.28407	0.46074	-0.78491	8.62806	4.67932	4.10339	0.83664	-0.67498	1.62534	-1.15223	5.0097	3.19022	7.55779	1.14339	0.97876	2.48821	4.86623	2.97078	2.54646
P018	0.15711	6.90428	5.72118	1.858	7.47075	0.61197	0.94839	3.32897	2.69769	4.87606	6.736	3.59917	6.18229	2.52972	3.48627	6.64388	0.81056	2.15491	0.36932	2.8535	8.08758	1.78376	4.82348	1.42972	1.25021	1.51629	0.86302	4.25279	7.36864	6.12465	4.99125	0.60143	0.08489	9.90757	5.00409	4.79715	1.77188	0.88702	2.61456	-1.02683	5.15567	3.98773	6.99301	2.69874	0.85394	2.60982	6.24925	2.63391	2.87845
P019	-0.30214	4.38259	5.18622	1.47215	6.89322	0.38111	0.48496	2.33641	-0.20386	3.99412	6.41949	2.50795	4.18976	1.32455	1.08569	4.77733	-0.10097	1.67615	-0.45985	2.90895	5.05249	2.00813	3.89136	1.47368	1.37459	0.93714	0.23444	3.25096	6.47053	6.24094	4.19679	0.56871	-0.60234	9.38922	3.46492	3.83096	0.67927	-1.11948	1.67226	-1.503	5.75539	2.90364	6.03372	2.13745	0.9596	2.35077	5.30636	1.80597	2.43608
P020	0.32047	5.22273	5.1813	1.84203	6.582	0.22975	1.04527	3.35301	1.63698	4.72008	6.65172	2.1674	4.05158	1.34321	2.16271	5.11219	-0.23391	1.73703	0.08757	2.8456	4.8253	1.90584	5.45525	2.03449	1.07214	1.02649	0.17565	3.69563	7.13829	5.96302	3.75813	0.38852	-0.77976	3.91836	4.04424	3.71255	0.46255	-0.53699	1.93228	-1.15015	2.63508	3.29865	6.94041	1.17998	0.80479	2.49516	5.40467	2.70688	3.17895
P021	-0.0162	4.9453	5.12146	1.12921	7.08988	0.34403	0.50107	2.28123	1.33638	3.97092	6.77713	2.52175	4.29128	1.52246	3.55663	5.27204	-0.05747	1.81195	-0.30087	2.80785	5.33082	1.97941	4.4811	1.51075	1.3894	0.97723	0.32346	3.638	7.09371	6.33296	4.77891	0.94418	-0.38288	6.0498	4.25443	3.60028	1.17993	-0.59261	1.87139	-1.22327	5.43251	3.97757	6.53164	2.04936	1.16121	2.64006	5.39623	2.67256	2.63461
P023	-0.34845	11.1421	4.58762	1.10808	6.68291	0.01116	0.456	2.39443	0.74566	2.95459	6.4158	1.83416	3.76473	0.703	1.61005	3.96888	-0.22878	1.31605	-0.49854	2.68607	4.83865	1.55183	3.52175	1.20423	0.99233	0.46671	-0.6768	2.71253	6.38127	5.06042	3.91009	0.547	-0.76235	9.01638	3.48087	2.64256	1.2077	4.26024	1.45618	-1.80388	5.36523	3.4136	6.14098	1.87326	0.54724	1.88114	4.67418	1.29729	2.21548
P024	-0.41931	4.93619	5.38562	1.56034	7.56579	0.47503	0.60979	2.7707	1.36368	4.43549	6.83118	1.8226	4.22171	1.32488	0.88861	4.72482	-0.29213	1.97567	-0.22211	3.23642	5.48645	1.85619	3.71253	1.48511	1.66173	0.54097	0.59695	3.4124	7.60479	6.14041	4.67951	0.8597	0.10208	7.31972	3.28007	3.67485	1.03372	-0.72118	1.71934	-1.80184	4.55526	2.95545	6.21074	2.11257	0.7095	2.39739	4.82254	1.97334	3.08694
P025	0.08449	4.38606	5.05659	1.36269	6.83034	0.45758	0.84024	3.26153	2.11232	3.90418	4.01055	2.13781	3.7102	1.02079	3.09066	4.87393	-0.25505	1.7473	-0.11893	2.48499	5.11711	1.9494	2.85286	1.514	1.12978	1.33799	-0.24883	3.03806	6.86008	5.50526	3.58029	0.73015	-0.79477	7.25514	4.02521	4.18895	0.71628	-0.77971	1.09433	-1.30202	2.436	4.20126	7.21799	1.06726	0.82115	2.87516	5.35701	2.5947	2.82602
P026	0.53291	8.13414	4.27599	1.07511	7.03027	-0.08163	0.49893	1.64896	0.79155	2.04492	7.08521	2.23458	3.93183	0.96888	2.33424	3.93038	-0.22958	1.47945	-0.20288	2.16536	5.32229	2.10824	3.69775	0.72511	0.58571	0.82165	0.63761	3.44597	6.40066	5.29089	3.2284	1.37128	-0.87688	4.05999	3.29064	2.37083	0.29535	1.49676	1.46649	-1.70448	4.22481	3.45278	4.96622	1.43334	1.15327	2.51887	3.83538	1.46388	2.85599
P027	0.44487	8.23131	5.57727	1.42902	7.57861	0.59849	0.62566	3.1476	1.08035	4.11832	7.34732	2.0071	4.09785	1.51635	1.05715	3.92691	-0.14186	2.1092	0.14165	3.35866	5.50604	2.32045	4.35862	1.14711	1.73686	0.74555	0.18998	3.61734	7.12602	5.49875	4.25417	0.73145	-0.35846	9.82786	3.75391	3.682	1.0025	1.15958	1.79071	-1.29114	4.86655	3.35165	6.10406	2.38967	1.14103	3.04172	4.71517	1.69619	3.45951
P028	0.19648	7.35915	5.22642	0.93406	6.06392	-0.07875	0.50955	2.36965	0.51739	3.65771	4.4866	2.74882	3.963	1.28382	1.01122	4.44354	0.03018	1.38006	-0.39536	1.81282	4.7759	1.74212	3.1984	0.68307	1.16649	1.44225	-0.67818	3.02439	5.99201	5.19159	3.82142	0.34685	-0.71865	6.40662	3.90644	3.52948	0.99578	0.95616	1.52706	-1.71584	4.79537	2.81637	6.5891	1.94841	0.80186	1.64678	4.73309	2.36922	2.49943
P030	0.4814	5.09037	5.65678	1.70081	6.91619	0.59338	0.89327	3.59916	1.95241	4.04911	5.1299	1.48173	3.37241	1.81864	2.59419	4.35294	0.21682	2.0027	-0.0321	2.42878	4.34546	2.28478	3.47405	1.79175	1.32168	1.2533	0.09851	4.04954	6.62989	5.96458	4.13189	0.38041	-0.25958	9.54493	4.45323	4.32808	1.15555	1.12426	1.57351	-1.48518	3.10917	4.09926	6.80942	1.78278	0.99594	2.82016	5.12684	2.38557	3.09656
P031	0.79792	5.88823	5.30712	1.58559	6.99333	0.03626	0.64703	2.95726	2.00037	3.85127	5.96776	2.06122	3.66156	1.34743	3.51669	4.40916	0.25251	1.58399	-0.26609	2.92323	4.83516	1.71882	3.4874	1.00555	1.34071	0.98886	0.29382	3.67706	7.26646	6.00156	3.92563	0.74131	-0.73014	6.14212	4.04138	4.10387	0.88107	-0.17139	1.38174	-1.49216	4.08803	4.09727	6.67214	1.29108	1.05332	2.51458	4.9717	2.22134	2.85367
P032	0.27979	7.75129	4.81649	1.66449	7.20006	0.7008	1.13515	3.60272	2.64875	4.91688	6.48221	1.50367	3.94842	1.53297	3.46089	4.93546	0.22498	1.95458	0.05324	2.65264	4.48857	2.19131	4.37207	1.33332	1.2513	0.99381	-0.38379	3.38687	7.22459	5.57423	4.67275	0.54264	-0.01237	9.99191	3.46052	3.4026	0.82939	0.85826	1.91046	-1.69882	2.49748	3.15055	6.42152	1.39284	0.41491	2.6131	5.36709	1.69104	2.75581
P033	-0.05418	7.54516	4.16011	0.80451	6.22054	0.13532	0.70667	2.95314	1.6322	4.04637	5.39621	1.33311	2.99151	0.82342	2.9537	3.76422	-0.10117	1.31523	-0.42111	1.82093	3.39617	1.86999	3.07179	0.82083	0.80903	0.77949	-0.25955	3.01072	6.31341	4.97679	4.5866	0.08079	-0.95065	7.08773	3.0455	2.84886	0.90885	0.60615	1.27901	-1.59355	2.05073	2.83551	5.58257	0.77946	0.22936	1.90267	4.64553	1.4715	2.27439
P034	-0.22818	6.60129	4.21448	1.50658	6.16908	-0.1715	0.39459	2.79101	1.17533	4.07066	5.50521	1.15156	3.23833	0.68058	2.12495	4.00413	-0.10565	1.36143	-0.51353	1.72947	3.72444	1.84054	3.6198	0.72693	0.82758	0.74215	-0.16002	2.30417	5.96604	4.9657	4.60284	0.35492	-0.67579	9.62134	2.84845	2.9882	1.11682	-0.24258	1.23341	-1.51014	2.52034	2.58619	5.75667	1.05208	0.09648	2.07842	4.58995	1.35785	2.63822
P035	0.57415	4.71809	5.38184	1.6932	7.16097	0.42056	0.7231	0.67817	1.30338	4.74553	6.62661	3.02641	3.48385	1.2947	2.69114	5.15119	0.11419	1.73766	-0.1942	2.90364	4.78569	2.19362	3.23896	1.59314	1.23265	0.99265	0.27368	3.34399	7.30342	5.94775	3.21713	0.54147	-0.47573	9.52895	3.81099	3.52635	0.88156	-0.61062	1.58697	-1.91354	5.00914	2.95828	6.81852	2.03894	0.89626	2.87705	5.20221	1.74091	3.37072
P036	-0.19514	3.26097	5.20499	0.85328	6.49204	0.08402	0.40919	1.72901	0.18502	2.99871	6.14238	2.52287	4.03285	1.07769	2.15822	4.87493	-0.28704	1.36541	-0.55957	2.15373	4.68151	1.36028	4.23043	1.27376	1.07252	1.08059	0.7193	2.54772	5.78905	5.47605	4.56101	0.37386	-0.76338	4.99882	3.55999	2.692	1.04922	-1.00975	1.57918	-1.19149	6.49252	3.2528	6.26934	1.56917	0.74214	2.24394	4.16643	1.66339	2.46288
P037	-0.44551	6.75001	4.10167	1.33901	5.71495	-0.06762	0.42691	2.72101	1.01004	3.94573	5.25225	1.12796	3.29975	0.01107	2.75611	4.46016	-0.47888	1.17998	-0.16606	1.79362	3.61765	1.71267	2.81911	0.71295	0.43659	0.59992	-0.50805	1.73099	5.90728	4.75536	3.96341	0.36454	-0.9024	5.90326	3.05316	3.40328	-0.30712	-0.18218	0.99478	-1.09227	2.53569	2.58093	6.23476	0.98517	-0.00192	1.13072	4.33533	0.76196	2.40094
P038	-0.36648	4.24994	5.40373	2.24042	7.13203	0.3438	0.71805	3.03208	2.12591	3.32684	5.95062	1.25569	5.02733	1.94155	1.13843	4.7267	-0.41685	1.71051	-0.27265	3.20918	5.80864	1.97019	4.1467	0.7714	1.24959	0.71356	0.12918	3.59597	6.55418	5.86821	3.96144	0.64658	-0.41892	4.99286	4.06114	3.9294	0.82599	-0.80434	1.68005	-1.76411	3.63459	3.44043	6.64415	2.34586	0.65459	2.54301	6.16058	2.16091	3.02266
P039	0.19436	4.01406	4.72142	1.04284	6.65699	0.19139	0.43735	2.43747	1.00339	3.2464	3.97318	2.66929	3.32413	1.09847	3.48515	4.93248	-0.3042	1.68468	-0.54688	1.9846	4.53983	1.66665	2.43624	1.24637	0.97353	1.31834	0.47727	3.26398	6.64227	5.82591	3.91394	0.8454	-0.40556	9.89963	4.1165	3.73721	0.76214	-0.94106	1.49532	-2.26897	5.0388	3.08496	7.12063	1.39542	0.4719	2.26045	4.18205	2.01596	2.51235
P040	-0.21379	5.54804	4.39185	1.49756	5.95036	0.48626	1.04494	2.95592	2.50749	4.90148	6.10887	2.85024	3.50853	0.60114	0.87332	4.55619	0.10605	1.58788	-0.37489	1.72894	3.86822	2.04262	3.54504	0.78647	0.74391	0.05742	-0.04164	2.37861	7.03094	4.95446	4.14952	0.29257	-0.24517	6.51468	2.03621	3.55359	0.9824	-0.54969	1.33702	-1.79673	3.01275	1.75351	5.25597	0.92487	0.07881	2.13345	4.85441	0.87987	3.10863
P041	0.15042	6.42939	3.52631	1.65583	6.49612	0.46302	0.93347	2.4125	1.85429	4.59153	6.01291	1.91762	4.10571	0.89847	1.25951	4.45435	-0.05492	1.62141	-0.12132	1.99175	4.11805	2.60417	4.02646	1.34807	0.69506	0.54903	-0.02448	2.58781	6.90994	5.0162	5.89668	0.59058	-0.22857	9.36821	3.17763	3.9674	1.0113	0.04677	1.55555	-2.14972	2.49664	2.45727	6.06142	1.69642	0.41037	2.18069	5.07166	1.38698	3.24589
P042	0.13244	7.29344	4.61405	2.07719	6.90936	0.56819	0.62448	3.22015	2.25845	4.11888	5.10597	2.80711	3.45398	1.13506	2.06367	3.81131	-0.15673	1.91184	-0.16405	2.27742	4.00486	2.61787	3.0398	1.48192	1.26087	0.89256	0.77386	3.51007	7.50866	5.3441	3.94947	0.56406	-0.13019	9.62912	3.5533	4.13905	1.06487	0.52773	1.36297	-0.82485	2.43811	3.64818	6.33496	1.33607	0.53065	2.26264	4.74014	1.18454	3.33319
P043	0.08221	4.98106	4.70301	1.6057	5.96498	0.0219	0.40608	3.09807	2.06143	4.96083	6.21775	2.96863	3.35208	0.92776	2.5503	4.76166	-0.22546	1.59873	-0.06095	2.36587	3.85259	2.04655	4.29182	0.87306	0.39801	0.92575	-0.61346	2.5834	6.90574	5.29837	5.47766	0.54854	-0.59593	6.30144	2.44984	3.71801	-0.02717	-0.73479	1.54954	-1.15147	2.21192	1.67804	5.39839	1.43457	0.0723	1.69034	4.58658	0.85735	2.90019
P044	0.15203	4.41647	4.71554	1.87619	6.37588	0.30029	0.44734	2.90944	2.07568	5.18647	6.05603	1.29295	3.7737	0.85481	0.96815	4.72913	-0.55382	1.60829	0.03343	2.73051	3.86394	1.91127	3.62198	0.76451	0.80622	1.33154	0.15296	2.24448	6.5807	5.00771	4.66022	0.49284	-0.86834	5.9234	2.69353	3.4771	0.05716	-0.69209	0.99491	-2.2279	1.53905	1.86078	5.45205	1.26592	0.2447	1.62583	5.10826	1.39327	3.22878
P045	-0.15689	4.7982	4.2649	1.67936	6.04149	0.68956	1.1294	2.71429	1.53181	5.71315	6.23701	1.58785	3.96701	1.23307	2.35377	4.61958	-0.33052	1.77192	0.08699	2.31591	4.00224	2.40322	3.948	0.84811	1.05906	0.79558	1.36535	2.57714	6.27551	4.7183	5.50267	0.76766	-0.38472	7.97665	2.7099	4.13026	-0.06491	-0.81299	1.40209	-1.10358	2.20298	1.93306	4.8886	1.73296	0.20953	2.11916	4.86998	0.9899	3.49565
P046	0.08736	4.77587	4.69501	2.96925	6.43154	-0.09104	0.74606	2.32607	2.57824	5.10522	6.89495	2.56457	4.01442	0.99324	2.63275	6.00621	-0.07554	1.47671	0.14992	1.90893	4.22421	1.57533	4.86301	1.60905	0.24461	1.34946	0.01911	2.38393	6.51318	6.02919	4.82592	0.93162	-0.65275	6.73054	2.83794	3.92401	0.20831	-1.04226	1.5244	-1.34993	1.23195	2.05578	6.29867	0.79333	-0.04025	1.61732	7.34182	2.31134	2.79878
P047	-0.01005	7.9591	5.26678	1.36092	7.29483	0.17573	0.49224	3.27776	2.05057	3.74165	4.68625	2.77681	3.17646	1.44736	1.16403	3.86126	0.95633	2.01582	-0.01967	2.3849	4.52069	2.21887	3.44236	1.55629	0.89377	0.70859	0.67514	3.35148	7.43242	5.29383	3.96942	0.31419	0.08034	9.81552	3.99284	4.01999	0.83412	0.98728	1.45626	-1.28513	2.86593	3.47024	7.18817	1.3885	0.58636	2.3674	5.29249	4.46171	2.94035
P048	0.04225	7.25664	5.07701	1.94118	7.83312	0.53426	0.60676	2.6374	0.54997	3.89028	7.29937	2.50556	3.76367	1.19225	1.14625	4.52363	-0.09445	1.97688	0.17608	3.17976	5.07153	2.84647	4.81469	2.16013	1.86001	1.84249	1.14344	4.51711	7.46091	6.4987	4.47142	1.25398	-0.56342	9.24722	3.90436	4.69699	0.61215	0.27855	1.97023	-0.71247	6.63375	3.24194	7.00517	2.29736	1.62213	2.88534	3.04045	2.02251	3.3283
P049	0.02947	6.37597	4.74307	1.84361	6.15959	0.09543	0.54514	3.04473	1.82416	6.32658	6.33238	1.76642	3.76788	0.87586	2.26656	4.87712	-0.31157	1.60837	-0.21692	2.54638	3.90574	1.94523	3.81523	0.91308	0.68872	1.07404	-0.10577	2.31364	6.38292	4.70393	4.85542	0.4807	-0.46741	7.4383	2.97782	3.00381	0.13282	0.12162	1.36826	-1.15916	1.71029	2.32207	5.40646	1.27157	0.38114	2.1544	4.73863	1.29873	3.05578
P050	0.47754	5.28061	5.06204	1.02534	6.91077	0.36828	0.73258	2.66211	1.82129	5.32721	5.54126	2.06141	3.28908	1.18706	4.62607	5.00142	0.4462	1.69752	-0.16033	2.92076	4.33235	2.18961	3.61676	1.26582	1.22742	0.97049	-0.03963	2.8751	6.76635	5.56789	4.1264	0.3371	-0.69706	7.94872	4.0838	4.22008	0.92553	-0.4224	1.46532	-1.4631	3.48091	3.02713	6.74526	1.15123	0.52339	2.24148	4.82657	2.51339	2.80027
P052	0.09233	5.96354	4.68131	1.4255	5.96549	0.00544	0.87404	2.06951	1.33566	5.41944	5.90667	2.45724	2.96402	0.38968	1.3477	4.30138	-0.11345	1.24437	-0.29233	2.53498	3.50773	1.63416	3.0486	0.97333	0.84725	0.46449	-0.35252	2.10333	6.56071	5.30212	4.28584	0.6331	-0.80927	6.84532	2.58237	2.54779	-0.15036	1.20719	0.99774	-1.65661	2.77283	1.96395	6.08779	0.90913	0.04282	2.03874	4.38666	1.22823	2.51195
P053	0.94338	6.2245	5.98396	2.20315	6.50229	0.64677	1.31831	2.72875	2.65312	5.36206	5.19687	2.72477	6.86477	3.14243	1.90701	6.45772	0.14125	2.65523	0.92845	2.31726	7.78952	2.80535	5.20912	1.83181	1.26034	2.25272	0.78957	4.79937	6.8433	4.68576	8.04974	0.74398	0.1777	8.34173	4.30633	4.64789	2.77345	1.15762	3.63022	-0.57441	4.4228	3.31224	6.33109	2.85024	1.68826	2.89261	5.82076	2.35899	3.53123
P054	1.21141	5.17371	5.56824	1.75824	6.54913	0.08921	0.64365	2.48287	1.32974	4.49876	5.23352	1.75128	3.25854	1.31122	4.75636	4.88475	-0.30298	1.57159	-0.19996	2.80145	4.2544	2.27558	3.47028	1.07447	1.19994	-0.22281	0.25393	2.46929	6.59833	5.63304	4.89385	0.63493	-0.72097	5.60573	4.51936	3.74729	0.03576	-0.57345	1.62799	-1.79541	2.4285	3.41717	7.1331	1.44538	0.03482	2.6281	5.22091	2.6873	2.64137
P055	0.17152	5.32635	4.80638	1.70609	6.90838	0.43585	0.63492	3.00151	1.95428	5.27071	6.4313	2.25544	4.03977	0.83434	1.52681	3.84733	0.06978	1.80368	-0.03261	2.56235	4.11323	2.03196	3.75325	1.15238	0.88933	0.95833	-0.05799	3.24593	7.04056	5.12622	5.20012	0.34438	-0.16361	7.64657	2.98348	4.45219	1.15708	-0.66476	1.63338	-1.35193	2.8746	3.1546	5.78497	1.43534	0.57007	2.04037	4.83105	1.62881	3.37349
P056	0.0005	5.49624	4.69174	1.33081	6.71838	-0.09288	0.48383	3.00227	2.45094	4.28121	4.79407	0.3072	2.95476	0.90445	1.94925	4.33216	-0.22522	1.58418	-0.08511	2.26216	4.10925	2.1123	3.18105	0.13624	1.32507	0.5408	-0.03923	3.45655	6.7531	5.0254	3.71981	0.76624	-0.66507	9.36874	3.38744	3.69306	0.31233	-0.6876	1.56869	-0.85858	2.6535	3.24094	6.93621	0.84058	0.27269	2.23707	5.41654	1.52224	2.58971
P058	0.06831	6.79454	4.94687	1.20011	6.90925	0.01638	0.24129	2.45274	1.21558	4.74619	5.28401	1.42608	3.35719	0.73195	1.54277	4.36556	-0.01935	1.52785	0.05871	2.18067	3.43909	1.63016	3.73409	0.77527	0.65398	0.16545	-0.60405	2.47246	6.90489	4.90756	3.48449	0.19594	-1.00068	7.52141	2.89822	3.77885	0.07778	-0.05051	1.28121	-0.94957	1.55674	2.98746	6.86417	0.63726	0.18301	1.51478	5.37306	1.80208	2.34581
P059	0.02037	6.7228	4.76228	1.30251	6.23537	0.06229	0.60695	3.09159	2.33202	5.14673	7.15177	2.33722	4.68217	3.06558	5.76382	9.87127	2.95777	1.46122	0.42809	2.75808	6.0184	1.75131	5.14043	0.99772	0.7191	0.50665	0.18687	2.52521	6.66947	7.95023	4.30016	0.34602	-0.42386	9.99089	3.98966	4.20659	0.2685	-0.00727	1.458	-1.53048	2.83643	2.83984	7.59683	1.39542	0.37892	2.18009	9.78049	5.12256	2.66425
P060	0.04068	6.63314	4.6911	1.39913	6.73149	0.39068	0.91343	3.62149	1.89765	4.73662	5.28322	1.89757	3.95566	1.0003	2.00217	4.62082	0.00089	2.01656	-0.28278	2.25019	4.81005	2.22327	3.36672	1.72903	1.2397	1.21656	-0.10822	3.73005	6.7986	5.70467	5.00287	0.43221	-0.27515	6.34187	3.55788	4.13421	1.00754	0.43406	1.52848	-1.27169	2.95843	3.12746	6.43283	0.9376	0.71051	2.54005	4.877	2.20965	3.41383
P061	-0.16183	5.0236	4.32233	1.45623	5.93952	0.16754	0.6301	2.23843	1.64729	5.0225	5.47229	1.46402	3.43481	0.62704	3.32445	4.65088	-0.50448	1.41538	-0.41903	2.06868	3.9443	1.50213	2.92838	0.56435	0.70739	0.21023	-0.40694	2.57373	6.33589	5.04878	3.78391	0.44511	-0.64434	5.57956	2.73491	2.57529	0.97547	-0.34724	1.14898	-2.14468	1.87189	2.40129	5.8999	0.81378	0.1001	2.05712	4.46858	1.34055	2.30953
P062	0.16948	4.83955	5.29763	1.13574	7.28055	-0.05787	0.66065	2.7025	1.94242	4.10145	6.50484	2.64071	3.00218	0.8535	1.75822	4.57251	-0.16502	1.57991	-0.18901	2.89656	4.08833	1.94389	3.38228	1.18389	0.72078	0.1672	0.62863	3.08936	7.13334	6.04607	3.26938	0.25168	-0.90968	8.2828	3.46435	3.2727	0.25179	-0.87303	1.30245	-1.4062	3.10188	2.58659	5.70843	1.28204	0.55221	2.25172	4.66472	2.19432	3.09043
P063	0.52325	5.60625	5.20926	1.26348	7.10849	0.74239	0.8335	3.76661	1.09568	3.84457	5.51714	2.32635	3.4665	1.17629	1.55764	4.17244	-0.30802	1.99974	0.09242	2.29796	3.96873	2.11152	3.37461	1.53501	1.07817	1.33784	-0.63042	3.12494	6.88603	5.38799	5.01931	-0.05966	-0.27835	9.03683	3.6326	3.86828	0.95473	-0.56806	1.3658	-1.48987	2.19422	3.27629	6.84755	1.15383	0.5537	2.43691	4.90743	1.87719	3.41122
P065	0.24355	9.95316	5.60049	2.44069	6.68088	0.2851	0.70053	2.44716	1.28249	3.40212	6.00648	1.90487	4.76062	1.47067	3.58139	4.70478	-0.37687	1.84924	-0.02355	2.93231	5.61708	2.33533	4.07781	0.93414	1.32671	1.60591	0.3514	2.94254	6.51517	5.91726	4.60255	0.58667	-0.37536	10.2309	4.5541	3.49306	0.32803	2.37338	2.33481	-1.2801	5.45675	3.45232	6.41864	2.67083	0.36874	2.20163	4.99932	1.05245	3.38879
P067	0.2133	6.03844	4.61656	1.52528	6.61675	0.41802	0.87769	3.41569	2.41471	4.41159	5.30691	2.1368	3.71908	1.21533	0.32767	4.36113	-0.31419	1.80309	0.00136	2.28275	4.21651	2.10026	3.22876	1.1016	0.74254	1.07937	0.01526	3.1482	6.95014	5.82007	4.35321	0.43648	-0.43894	6.28975	3.52657	3.75364	0.90234	-0.25428	1.34311	-1.72744	1.77143	3.16268	6.17291	1.18582	0.61915	2.07788	5.05086	1.92321	2.70792
P068	0.16871	4.23109	5.01183	1.63607	6.55045	0.25169	0.38747	2.96019	1.25973	4.2511	6.18159	1.88168	3.91023	1.65838	1.46323	4.96084	-0.45114	1.66499	0.02617	3.04283	4.95845	1.91697	4.27663	1.53339	1.18682	0.62458	-0.50594	3.37236	6.54308	5.66722	3.38686	0.2893	-0.94497	6.57993	3.30746	4.41356	-0.03505	-0.85383	1.30673	-1.42348	4.38704	3.19299	6.75665	1.88319	0.61414	2.52636	5.35223	2.10175	2.62475
P069	0.27998	4.97777	5.8747	2.18455	7.75382	0.307	0.81465	3.89725	1.97713	4.5481	6.07786	3.0682	4.2443	0.78242	4.79434	4.36957	0.4361	2.1571	0.30531	3.11471	4.87914	2.62086	3.48274	1.78804	1.29852	0.80547	0.03784	3.3687	7.09835	5.67346	5.75235	0.46166	-1.01432	4.13959	4.22993	3.94526	0.16173	-0.67666	1.93588	-1.2895	4.33546	3.6503	6.59114	1.74711	0.82455	2.43366	4.85061	2.51401	3.51173
P070	-0.24868	5.35104	4.67931	0.78795	6.14851	0.0733	0.4106	2.23739	0.4941	3.03736	3.08418	1.36782	2.96998	0.31731	3.53926	4.46034	-0.64107	1.25951	-0.45611	1.32862	3.66695	1.81716	2.3949	1.10542	0.53528	1.10538	-0.05782	3.0643	6.42773	4.66927	3.69227	0.35253	-1.35533	8.42175	4.23413	3.01844	0.08187	-0.45015	1.32931	-0.90622	3.37245	3.25334	6.35941	0.83448	0.13954	1.52353	4.38682	1.82707	2.8659
P071	-0.37043	3.87915	4.27976	1.2096	6.39016	-0.27378	0.76122	2.79433	2.35543	4.71397	5.63513	0.84853	3.08615	0.51975	1.1298	3.88036	-0.09508	1.1418	-0.20095	2.10293	3.5794	1.44376	2.85451	0.88169	-0.01334	1.45514	0.41241	2.13588	6.28379	4.70305	4.5287	0.09716	-0.76039	7.36854	2.4518	2.84709	0.12952	-0.65893	1.01824	-1.26847	2.25036	2.16884	5.61634	1.00647	0.2557	1.56877	4.46648	1.63994	2.51718
P073	-0.0317	4.55231	4.36759	1.59188	6.56395	0.30406	0.77497	2.86685	1.89856	5.65449	5.88026	2.90267	4.06094	0.60583	1.97363	4.49397	-0.10287	1.78661	-0.22221	1.9004	3.52418	2.08852	3.77089	0.72292	0.68207	0.64829	0.04501	2.60755	7.42494	5.58427	5.35859	0.08803	-0.17955	4.96888	2.87843	3.31384	0.82812	-0.73487	1.48416	-1.35967	2.28179	2.44973	5.5808	1.58931	0.37411	2.21173	4.80418	0.4949	3.29526
P074	0.56912	5.44662	4.79699	1.67457	6.85062	0.32186	0.89622	4.00878	1.55058	5.22293	6.47912	1.90259	4.45833	1.0379	2.67204	3.95061	-0.3985	1.99515	0.18339	2.3649	4.69668	2.69831	3.43171	0.78648	0.71843	-0.15913	0.01835	3.21473	6.77537	4.66296	5.74933	-0.20666	-0.53363	7.21307	3.2447	4.04318	0.11666	-0.47057	1.75774	-1.99428	1.56777	2.80306	5.54908	1.52325	0.52756	2.17655	4.49319	1.73229	3.29956
P075	-0.20843	4.35471	4.38878	1.39016	6.88376	0.22491	0.80206	2.64784	2.34656	6.73749	6.5058	2.03897	3.84823	0.83945	2.15241	4.70792	-0.1943	1.63895	0.04101	2.55102	3.91315	2.16764	3.46162	1.01259	1.00109	0.84037	0.09483	1.96353	6.31521	4.9697	4.87937	0.53311	-0.83932	4.56193	2.51029	3.07016	0.22883	-0.72899	1.50781	-1.42363	1.13769	2.18815	5.56554	1.59046	0.16855	2.02997	5.26949	1.77707	3.21144
P076	0.24325	5.20422	4.8453	1.49133	6.83028	0.55278	1.28091	3.29224	2.27682	6.18329	6.87981	2.19132	3.72595	2.06803	1.98837	4.81936	-0.14765	1.80127	0.47962	3.48856	4.24774	2.40366	4.20105	0.46861	0.85771	1.12971	1.62651	2.71161	6.43601	5.31034	5.73492	0.466	-0.52122	6.33775	2.83965	4.27126	0.01515	-0.18121	1.70092	-0.59449	2.15518	2.53745	5.82951	2.06577	0.42594	1.89152	5.49799	1.97003	3.44255
P078	0.64912	5.77381	6.0728	1.58394	7.0179	0.43205	0.69388	3.61285	0.77462	4.13337	5.89299	2.32665	4.2538	2.06855	2.91321	4.55913	-0.068	2.03669	0.28891	2.25528	5.10019	2.74811	3.74442	0.78572	1.07857	1.57453	0.71001	3.65805	6.68842	5.27519	5.03279	0.30509	-0.76374	6.54716	5.01411	4.15985	0.19767	-0.22139	2.40833	-1.59981	3.74915	4.10188	6.65305	2.20164	0.91787	2.5031	5.71649	2.75902	3.32889
P079	0.34205	5.18918	4.16341	1.72191	6.1276	0.04911	0.60235	1.9474	1.92413	5.3451	6.08013	1.45215	3.58664	0.51038	3.02148	3.51151	-0.15403	1.22876	-0.22683	2.03013	3.52993	2.01066	3.74512	0.39957	0.62199	0.76759	0.11648	2.12546	6.23167	5.31874	4.63723	0.18688	-1.20667	7.28035	2.36513	3.40926	0.05524	-0.40544	1.06713	-1.52251	2.15677	1.86769	5.59574	1.05874	0.22488	1.79848	4.61302	1.42521	2.66645
P080	0.23597	5.44259	4.87255	1.1135	6.54551	0.13788	0.53531	2.44993	1.91413	4.30194	3.67923	1.05292	2.44417	0.85917	4.60486	4.06991	0.4475	1.56998	0.11397	2.42921	3.56867	2.44974	2.83227	1.22956	1.0979	0.76695	0.00631	2.56366	6.71094	5.63273	3.22043	0.20932	-1.07689	6.52478	4.11272	3.27895	-0.33079	-0.50216	1.41083	-1.95231	1.91571	3.44098	6.84509	1.44523	0.48262	2.29657	5.09867	2.80016	3.02847
P081	0.25701	4.31509	5.24586	1.7112	6.63342	0.22729	0.78115	2.25276	1.40045	4.54254	5.64661	1.9143	4.81357	1.25371	0.71841	5.20069	-0.3447	1.7255	-0.1639	3.0461	5.61811	1.62702	3.82047	1.25704	1.26659	1.19927	-0.14241	3.00589	6.58076	5.39848	4.10634	0.41908	-0.93536	9.40385	4.38207	4.55723	-0.10035	-0.66969	1.95219	-0.98835	6.02942	2.78909	7.09067	2.01536	0.28276	1.95455	5.30443	2.41718	2.60936
P083	0.77351	5.18531	5.35766	1.80262	6.68156	0.46288	0.7912	2.50029	1.34405	4.69013	6.04706	2.36967	4.59949	2.22172	1.85585	5.03574	-0.2245	1.89821	0.10662	2.97834	5.5291	2.03605	4.06112	1.41225	1.72251	1.4797	0.10176	3.79939	7.1073	5.41468	4.20025	0.57308	-0.58864	7.67419	4.1413	3.79178	0.0329	-0.15739	2.09576	-1.30649	5.17076	3.04581	6.90727	2.38847	0.7449	2.2466	4.9851	2.33927	3.36233
P084	-0.02386	4.7013	4.87463	1.16501	6.41776	-0.1451	0.50155	3.22328	2.36494	4.29218	4.72651	1.27161	3.85437	0.53886	0.6212	4.33626	-0.32125	1.51618	-0.07502	2.1717	4.40984	2.06929	3.22112	0.11196	0.78433	1.21854	0.36133	2.62059	6.3495	5.38401	4.96797	0.41649	-0.82932	7.27249	3.16669	4.1832	0.23321	-0.95031	1.30855	-1.21391	2.62598	2.68636	6.68313	1.10248	0.24154	1.84842	5.70538	1.8444	2.72431
P085	0.34979	6.00308	4.70174	1.18635	7.79227	0.37232	0.64493	2.74934	0.96117	3.90206	6.37449	2.40106	3.95154	1.35082	3.92123	5.18139	0.42122	1.77612	0.20788	3.62694	5.5164	1.65147	3.98971	1.70691	1.06485	0.91801	0.77922	3.92301	6.50141	5.67017	3.68543	0.97579	-0.74428	5.75049	3.84783	4.354	0.04026	-0.13815	1.69868	-1.58462	5.30522	3.70291	7.24699	2.01845	0.73974	2.7121	6.35705	2.41586	3.00915
P086	0.15848	4.86642	3.71724	1.36558	6.41665	0.3527	0.83118	2.90357	1.61143	4.85465	6.47971	1.17009	5.02614	1.2841	0.95494	4.6419	-0.29555	1.87932	0.26727	3.18982	5.43799	2.06237	4.38202	1.11503	1.24903	1.27479	-0.28983	3.7763	6.82978	5.85459	4.12734	0.86878	-0.46282	7.74334	3.75655	3.3287	0.0521	-0.52176	2.05188	-1.29312	5.20207	3.40915	6.44118	2.71947	0.85613	2.7166	5.38444	0.87568	2.98241
P087	-0.31136	5.03476	3.60835	1.53416	6.03657	0.19081	0.77661	2.32944	1.43437	4.8102	5.61136	1.94045	3.81927	0.71638	1.81343	4.44722	-0.57081	1.27627	-0.14596	1.69577	3.7323	1.55266	3.3706	0.61532	0.41953	-0.71985	-0.30651	2.11335	6.16184	4.70884	4.35657	0.40653	-0.50992	8.04854	2.34062	2.9337	0.07685	-0.67221	1.34892	-1.89674	1.29196	1.40339	4.89744	0.94709	-0.05318	2.07832	4.67454	0.70721	2.74367
P088	0.05806	5.3402	4.58171	1.27436	6.43318	-0.00138	0.72488	2.84037	1.92185	4.35879	5.89707	1.4216	3.25548	0.42755	1.92349	4.31107	-0.3462	1.34535	-0.11296	2.09224	3.43316	2.59987	2.92763	0.36947	0.65228	1.11672	0.17601	1.83623	5.88429	4.48277	5.01637	0.27914	-0.85234	5.46476	3.078	3.01632	0.35932	-0.53021	0.96452	-1.58159	1.31802	2.43692	5.5348	1.03121	0.23031	1.12751	4.94295	1.28073	2.67759
P089	0.09374	5.26618	4.58337	1.31403	6.47329	0.33892	0.60184	2.94629	2.12775	5.59652	5.78302	0.85045	3.73791	1.03979	0.47009	3.43684	-0.35008	1.45465	0.22244	2.34393	4.21345	1.79421	2.78949	0.75761	0.86708	0.73546	1.01047	2.66546	6.69688	4.61043	5.01495	0.11869	-0.71967	7.02151	2.79914	3.79101	0.03256	-0.5424	1.16781	-0.90147	1.70925	2.44326	5.28745	1.3175	0.34925	1.94547	4.86271	1.4746	3.18033
P090	0.58082	5.21474	5.31488	1.61701	6.38109	0.29638	0.56766	2.45806	1.19454	5.00453	6.57474	1.94108	3.83604	0.63936	4.59214	4.86252	-0.28402	1.74454	-0.2432	2.73618	4.85457	2.07552	4.91132	1.97534	0.85455	1.6316	0.25143	3.73091	6.87655	5.92074	3.79567	0.59621	-0.67643	9.17909	3.77745	2.7343	-0.09787	-0.07929	2.70789	-1.85151	4.21007	3.50035	5.81896	1.34587	0.98897	1.65026	4.23244	2.34655	2.92343
P091	0.09819	4.80771	4.34764	1.20777	6.21233	0.17107	0.93987	3.52721	2.67525	6.46861	6.6029	1.97822	3.59222	0.79407	1.80505	4.06454	-0.17871	1.61613	-0.37528	2.46283	3.52854	2.14059	3.46995	0.33266	0.50918	-0.82584	0.49563	2.11403	6.80488	5.4833	4.35033	0.27977	-0.68409	8.70136	2.27726	3.24394	0.82468	-1.07156	1.314	-1.60239	1.78737	2.03868	5.58457	1.29981	-0.0106	2.44534	4.46622	1.074	2.93126
P092	-0.11215	4.52781	3.96168	1.35943	5.52546	-0.09452	0.75039	2.92203	1.92079	6.32585	5.34844	2.2464	3.282	0.88381	2.46417	4.42923	-0.5107	1.48441	0.02286	1.81465	3.52147	2.01076	3.4173	0.27695	0.67601	0.08847	0.8441	2.54521	6.91132	5.02254	4.35512	0.15744	-0.75892	7.39371	2.23046	3.15543	0.09616	-0.81643	1.55315	-1.30688	2.64169	1.99829	5.24618	1.31645	0.01225	2.04589	4.4934	1.23189	2.76874
P093	-0.18321	4.36139	4.51571	0.93189	6.64468	0.06989	0.62334	2.2894	1.04277	3.67875	5.86325	2.08987	3.66269	0.55891	0.80729	4.14799	-0.18643	1.29495	-0.19939	2.33645	4.18163	1.89053	3.18543	0.88076	0.55043	1.38194	0.1949	2.94078	6.21854	5.32322	3.27171	0.14213	-0.86281	7.45458	2.6638	3.55929	0.04013	-0.82031	0.96365	-0.98197	3.36307	2.37657	5.44036	1.70863	0.64091	1.88098	4.07201	1.55713	2.62829
P094	0.25372	4.94297	5.48224	1.06129	7.43713	0.07555	0.91613	2.33698	1.86854	4.20157	6.2954	2.53686	3.44524	1.55106	1.40072	4.89463	-0.0646	1.73307	0.00814	2.26086	4.12674	2.3404	3.18836	1.5394	1.15072	1.44531	0.51285	3.07964	6.42668	5.81906	3.86994	0.47516	-0.70216	9.86925	3.82524	3.67296	0.07064	-0.73602	1.72186	-1.10809	4.79101	2.95837	7.0066	1.78064	0.57384	2.33112	4.51778	2.56598	3.38471
P095	0.45478	5.83958	4.69793	1.21737	6.63576	0.14552	0.37342	2.05981	1.39239	4.53925	6.01045	1.96052	2.91776	0.66748	2.28945	4.38661	-0.04452	1.31751	-0.51594	1.84106	3.76176	1.62064	3.62038	1.27339	0.69509	0.95229	-0.05112	2.53008	6.33513	5.34173	4.79202	-0.12096	-1.08125	6.00799	3.75862	2.85624	0.11425	-0.29313	1.39937	-0.96812	2.90978	2.67884	5.30079	0.77753	0.34105	1.89687	4.96091	2.19512	2.43624
P096	0.65047	5.5239	5.23078	1.53628	6.91427	0.44942	0.39527	2.6411	0.18056	4.77383	5.96022	2.29049	2.91016	1.5638	1.70205	4.43416	0.31469	1.87549	0.1247	1.8012	3.78292	1.63801	3.51305	1.65634	0.9337	0.46287	-0.01848	4.11971	6.15255	5.30273	3.77747	0.16295	-0.89715	5.76936	4.33515	3.56867	0.13096	-0.5683	1.87703	-0.96479	3.21114	3.21856	5.90119	1.02979	0.45206	1.69203	4.55332	1.6917	2.60215
P097	-0.06146	4.34001	4.17414	1.62045	6.59065	0.0684	1.06323	2.15894	1.64626	3.35447	5.34663	1.65828	3.53979	1.58512	1.1365	4.24593	-0.42353	1.67154	-0.19914	3.30292	4.79363	1.95847	3.06277	0.67435	1.28488	1.12678	1.32317	3.84874	6.26806	4.83811	4.30077	0.64563	-0.62754	9.48441	3.11972	3.92441	-0.15547	-0.65394	1.5078	-1.31461	4.93761	2.87364	6.46254	2.47947	0.60971	2.63142	5.57381	1.4124	3.252
P098	-0.14483	5.08134	4.2174	1.12875	6.06601	-0.16509	0.23402	1.85963	1.82377	3.04844	5.71679	1.44141	5.52638	1.69498	1.12535	5.40554	-0.54706	1.50337	-0.05914	2.26914	7.09744	1.54458	4.45073	0.79082	0.86279	0.72336	-0.11963	3.38611	5.76159	4.6905	3.63816	0.41331	-0.98712	7.10722	3.72329	3.98945	0.17913	0.18739	1.55501	-1.78741	4.57361	2.83949	5.64555	2.10023	0.27482	1.52907	4.99961	1.44376	2.2579
P099	0.404	6.05505	4.5723	1.77387	6.04172	-0.15104	0.47387	2.3903	1.38618	4.34391	5.40522	2.04019	3.7511	0.91072	1.50707	4.89346	-0.26767	1.41651	-0.40556	1.70858	4.69412	1.72274	3.05195	1.11463	0.62184	0.83743	0.2847	2.68953	6.20588	4.96909	4.3173	0.56361	-0.76466	5.75491	3.30294	3.20082	0.13268	-0.14585	1.48861	-1.73105	3.76268	2.21163	5.16106	1.49566	0.3868	1.52467	4.21331	1.46788	2.38521
P100	0.15319	5.25663	5.08807	2.03522	7.14997	0.43718	0.35688	2.84349	1.39309	3.85539	6.16026	2.17994	4.1689	1.31258	1.92329	4.29709	-0.16667	1.953	-0.49717	3.34165	4.86032	2.33767	3.42052	1.37206	1.5475	0.78168	0.45573	3.5911	6.80955	5.8643	4.29509	0.50701	-0.43551	10.0364	3.74991	3.94457	1.03019	-0.64255	1.57087	-1.49536	4.2174	3.72059	7.23247	1.86924	0.94559	2.64912	5.37385	2.14815	3.22871
P101	-0.18879	5.01899	4.7619	1.61875	6.42813	0.5567	0.88413	2.71326	2.21067	5.80304	6.39815	2.88186	4.1263	1.19678	2.94801	4.41664	-0.27965	1.91555	-0.0842	1.87507	4.11389	1.79515	3.98914	0.83715	0.52842	1.19032	0.55319	2.80803	6.69856	5.18122	5.74756	0.16131	0.07702	8.26094	2.77378	3.2164	1.16213	-0.30626	2.39187	-2.20253	1.592	2.28812	5.13456	1.78493	0.24826	2.08147	5.07678	0.93252	3.24332
P102	-0.07136	5.30317	4.26189	1.26478	6.3926	0.4902	1.03061	3.13452	2.4167	5.43372	6.48795	1.38528	3.95546	1.25573	4.46396	5.02758	-0.29666	1.60155	-0.28786	2.21931	4.1919	1.95442	3.55169	0.4668	0.53754	-0.00996	0.45061	2.99712	6.57034	5.2038	5.30887	0.45968	-0.50995	6.71092	2.6735	3.38008	0.60878	-0.46569	2.34858	-1.2036	1.25526	2.7626	5.53082	1.32822	0.21043	1.52171	5.22549	1.18324	2.47311
P103	-0.148	5.29644	4.26678	1.33074	6.31005	0.26135	0.74424	2.91007	1.15153	5.51036	6.24819	1.46073	3.74982	0.84016	2.46688	3.84751	0.03923	1.3962	-0.20073	2.39104	3.61796	1.41229	4.14399	0.66957	0.22887	0.95011	0.25112	2.22037	6.30145	5.3389	5.6705	-0.00035	-0.3007	5.825	2.54532	3.02024	0.85994	-0.71613	1.81249	-0.95221	1.29935	2.13722	5.36907	0.97003	0.2455	1.75963	4.72007	1.16371	3.04757
P104	-0.35606	4.94046	4.49476	1.35761	6.3581	0.18588	1.10769	2.38745	1.97118	5.70203	6.05769	1.56684	3.80225	1.14964	0.87189	3.63313	-0.29108	1.68279	-0.25342	1.73887	3.75863	1.92996	3.56989	0.83451	0.87638	1.74801	0.34158	2.89197	6.7924	4.81195	5.84323	0.5482	0.10105	5.14063	2.39011	3.31127	1.07422	-0.85078	1.61615	-1.36703	1.84872	1.97136	5.08187	1.57388	0.23538	2.12295	4.12827	0.80323	3.50826
P105	0.02269	4.76161	4.55355	1.9712	6.58776	0.57161	0.79555	3.40704	2.26388	4.88829	6.35849	1.46772	3.83447	0.89877	3.74518	4.48473	-0.15179	1.64713	-0.17432	2.17492	3.68238	2.4953	3.97741	1.2327	0.64516	1.45262	0.06016	2.26057	6.41965	5.06391	5.31928	-0.04633	-0.13618	4.57006	2.64253	3.50135	1.04763	-0.72885	1.7112	-1.58716	1.69508	2.212	5.71887	1.26602	0.29699	2.11767	4.65326	0.63502	3.41387
P106	-0.1842	5.66257	5.00626	1.11016	6.59078	0.54815	0.91104	3.06485	2.78157	6.16935	6.25276	1.54546	4.07349	1.48678	3.01698	4.14862	-0.13516	1.70428	-0.23344	2.34346	4.43696	1.71705	3.9335	1.05167	0.523	0.56101	0.06783	2.7508	6.70063	4.99393	5.98844	0.10725	0.01676	6.79737	2.85879	3.43065	0.55408	-0.65955	1.95655	-0.8941	2.32613	2.73062	5.26925	1.37267	0.22195	1.97955	5.063	1.32143	3.39785
P107	0.13346	5.67538	4.48521	1.60535	6.83551	0.3207	0.83896	2.95186	2.22622	6.03196	6.55623	2.65084	3.92207	1.26992	2.04264	4.55015	-0.37932	1.59435	0.15325	2.68953	4.11315	2.38796	4.15525	1.02935	0.88902	0.62668	-0.33212	2.69388	6.60355	4.71117	5.83873	0.72272	-0.38327	8.78498	2.69588	3.68156	0.2754	-0.50816	1.7027	-1.18108	2.37388	2.43496	5.4516	1.51413	0.10824	1.57315	5.01627	1.36677	3.63514
P108	0.00982	5.56099	4.65796	1.35813	5.99518	0.02513	0.66615	2.87364	1.9269	5.67355	6.00441	2.06951	3.7871	0.77073	1.00443	4.6307	-0.24565	1.56109	-0.07708	1.78153	3.9453	2.33772	3.83827	0.66755	0.70828	0.88376	0.21069	2.51575	6.93352	4.94626	4.78595	0.13985	-0.40297	8.2703	2.51854	3.18186	0.14517	-0.54295	1.45263	-1.34694	2.30697	1.917	4.99537	1.05914	-0.19352	1.97693	4.50383	1.01614	3.1339
P109	-0.54129	4.67429	4.9463	2.3369	5.96878	0.52211	0.77008	2.95496	1.71873	4.34935	5.99709	1.85583	3.8056	0.92991	1.42131	4.56258	-0.31588	1.57205	-0.13028	1.92419	3.86963	2.12968	3.15877	0.93111	0.72723	1.22044	0.43564	2.21203	6.15424	5.47235	5.34811	0.23244	-0.46658	6.75887	2.54508	3.3241	0.8834	-0.97685	1.42345	-1.28559	1.88434	2.07556	5.55057	1.26677	0.19446	1.91686	4.58278	0.75876	3.31955
P110	-0.20324	4.0909	4.90355	1.85797	6.44266	0.61982	0.83521	3.25571	2.03805	5.85342	6.33859	1.87891	4.34135	1.69224	0.30825	4.57241	-0.26135	1.67131	-0.20355	1.95714	4.16409	2.05215	4.19397	0.67637	0.72503	0.37161	0.47367	2.56101	6.86402	4.97702	5.65178	0.34881	0.08785	6.19344	2.60842	3.59818	1.0997	-1.0405	1.69192	-1.45319	1.40244	1.97666	5.14296	1.19222	0.1731	2.27884	4.56834	0.68887	3.29214
P111	-0.03708	5.1641	4.96246	1.62972	6.65183	0.97801	0.95354	2.67375	1.6209	5.15573	6.47394	2.02342	4.22401	1.54318	1.15759	4.62086	0.0192	1.93488	0.05378	2.08034	3.93651	1.86503	3.87738	1.11737	0.88565	1.33561	0.32797	3.12183	6.88186	5.36409	5.79409	0.37861	-0.1266	6.01749	2.96748	3.72585	1.00388	-0.72985	1.68795	-0.91734	2.37906	2.33899	5.11437	1.85506	0.55656	2.17943	5.0801	0.76392	3.48017
P112	-0.09653	5.6841	4.83135	1.97705	6.88848	0.65169	0.6692	3.27207	1.86964	6.51273	6.56093	1.99014	4.08992	1.21793	1.97762	4.89005	0.15353	1.92848	0.34312	2.61425	4.2314	2.52438	4.0766	1.13762	0.97456	1.16949	0.79397	3.11062	7.04344	4.97724	5.27757	0.73501	-0.33193	3.41503	3.07691	3.62437	0.24136	-0.33272	1.74824	-1.07751	1.59046	2.27849	5.79405	1.63489	0.37521	2.50914	4.59372	1.56314	3.35407
P113	0.27816	5.97211	4.78407	1.83535	6.83221	0.75143	1.00671	3.46732	2.53794	5.46941	6.78644	2.27028	4.13852	1.0318	1.45303	4.42129	0.08835	1.87516	-0.18031	2.68412	4.35103	2.60308	3.84125	1.14488	0.75073	1.04522	0.39023	2.7345	7.19778	5.21617	5.35969	0.93357	-0.02512	8.46841	2.74077	3.87925	1.02098	-0.21385	1.71868	-1.0409	2.09678	2.53275	5.70534	1.45963	0.28772	2.29595	4.72859	1.08924	3.37839
P114	0.055	5.83091	4.55797	1.65931	6.67269	0.53533	0.79297	3.21259	2.19618	5.04333	6.87332	2.36171	4.19903	1.6943	1.51996	4.27549	-0.18928	1.87206	-0.16056	2.38801	3.97552	1.95993	4.04629	1.10948	0.80527	1.28126	0.6602	2.73602	6.79089	5.64864	6.03397	0.42092	-0.07154	5.29954	2.71545	3.39371	0.91417	-0.37201	1.83747	-1.5088	2.03143	2.70787	5.72506	1.60252	0.28275	1.97751	5.23879	0.87988	3.10951
P115	-0.21254	5.74143	3.94828	1.31509	5.73399	0.34587	0.55601	2.18191	1.26727	4.74961	5.89897	1.40903	3.64629	0.78923	3.03436	3.98311	-0.03073	1.31461	-0.3099	1.78056	3.45712	1.69708	3.3897	0.5783	0.50719	0.87407	0.46791	1.98509	6.18477	4.80612	5.22736	0.40998	-0.36258	7.7874	2.245	3.01761	0.92045	-0.11181	1.60392	-1.3497	1.26786	2.13189	5.04357	1.1669	0.08444	1.82005	4.61531	0.73891	2.82659
P116	0.48062	6.47234	4.05342	1.36159	5.91406	0.26208	0.902	2.45016	1.84106	5.30868	5.9069	2.2509	3.89557	1.17831	2.63898	4.09171	-0.03112	1.44609	-0.51766	1.87844	3.62967	1.74442	3.49857	0.37266	0.60345	0.71736	0.46477	1.90331	6.2023	4.83956	5.15406	0.5137	-0.48412	3.56589	2.57541	3.10262	0.84023	0.15666	1.74749	-1.81709	1.44865	1.91649	4.64706	1.34567	0.09145	1.60975	4.10473	0.8493	2.97219
P117	1.27732	6.73448	5.0151	1.60295	6.67144	0.72905	0.95607	3.46585	2.57704	6.11483	6.41772	1.74138	4.04411	1.47227	0.92903	4.21446	-0.41362	1.93872	0.1657	2.61898	4.23803	2.19347	4.18675	1.48725	0.81021	0.22669	0.65412	3.08441	7.10891	5.25441	6.10258	0.70749	0.07356	7.34178	2.74898	3.78294	1.00377	0.3927	2.05449	-1.30644	2.41351	2.44785	5.68771	1.87122	0.28948	2.21196	5.24049	1.20021	3.45139
P118	0.41052	7.01631	4.98995	1.41297	6.64898	0.50019	0.80547	3.07371	2.19596	5.6377	6.77311	1.82305	4.18776	1.67563	1.78657	4.24437	0.05455	2.01278	0.07756	2.30191	4.34065	2.42092	4.41851	0.96878	0.74897	1.38737	0.71926	2.76178	6.87095	5.30305	5.80899	0.38425	0.00337	9.23354	2.99688	3.86221	1.05114	0.36853	1.99456	-1.39084	1.47391	2.26325	5.90494	1.50424	0.32565	2.40853	5.26367	1.45436	3.65123
P119	0.37334	6.40921	4.91001	1.82909	6.44647	0.40018	0.74552	2.75444	2.06561	5.48567	6.17542	1.75309	3.96088	1.61524	3.07531	4.67932	0.17718	1.8607	0.04497	2.18463	4.19188	2.24041	3.9296	0.61592	1.0009	1.32119	0.4842	2.95084	6.83698	5.29355	6.38971	0.35331	-0.08277	6.51221	2.98323	3.679	1.04277	0.28092	2.11876	-1.17735	2.34015	2.35063	5.54042	1.65204	0.4775	2.31634	5.22325	0.86167	3.21698
P121	-0.14503	7.03909	4.70153	1.73964	6.5779	0.59045	0.38287	3.21656	2.30088	5.74694	6.09479	2.58047	3.82154	0.78749	1.10326	4.23798	0.15178	1.88138	-0.31946	2.31	3.72247	2.27406	3.77642	0.89607	0.92146	1.11411	0.61639	3.04756	7.18593	5.19905	4.97177	0.44696	-0.03656	6.86885	2.36919	2.82038	0.91907	0.0834	1.56501	-1.50717	1.80016	2.38027	5.18737	1.44573	0.20091	2.21609	4.97054	1.04784	3.04524
P122	-0.05136	5.57327	5.05364	1.58256	6.86177	0.72974	1.02849	3.23984	2.37985	6.11973	7.03412	2.50002	4.20383	1.48537	2.13529	4.56936	-0.08673	2.1228	0.06056	2.63034	4.46088	1.93642	4.14052	1.19536	1.01439	0.57886	0.48491	3.37464	7.20919	5.4796	6.2602	0.43895	0.0435	8.42868	3.01032	4.36633	0.74988	-0.35887	2.08513	-1.27696	1.95931	2.63076	5.36868	1.81092	0.36026	2.05036	5.24752	1.40729	3.53736
P123	-0.11498	6.52841	5.09989	2.2724	6.2952	0.55397	0.44666	3.50831	1.99361	6.28737	6.51186	2.15142	4.3765	1.03426	0.78947	4.14503	-0.20309	1.85883	-0.10213	2.3718	4.43623	2.45109	4.12904	1.04192	0.93533	0.32693	0.68974	2.49128	6.9848	5.15528	5.95366	0.56427	0.09207	8.17974	2.86729	3.57045	0.94792	0.11697	1.77287	-1.38121	1.82961	1.91258	5.9553	1.32231	0.2612	2.06369	5.16875	0.95576	3.70706
P124	0.09032	5.77435	4.66889	1.7398	6.81131	0.27768	0.73662	3.52619	2.01331	5.90863	6.55079	1.71036	3.96986	0.96412	1.17842	4.04625	0.42078	1.75768	0.22211	2.37885	4.09782	2.40225	4.14395	0.49511	1.03243	0.81043	-0.00892	3.07139	6.63821	5.4803	4.60142	0.70323	-0.52493	6.14924	2.70772	3.67487	-0.01593	-0.45522	2.09586	-0.98123	1.51478	2.16187	5.8477	1.50183	0.122	2.59098	5.38304	1.73738	3.06861
P125	1.34514	6.7439	4.07218	1.37254	6.47123	0.34001	0.54369	3.01734	2.36699	5.08137	6.21143	2.50285	3.92802	1.18097	1.98986	4.174	-0.14115	1.67136	-0.27157	2.25207	4.19978	2.36279	4.86992	0.43493	0.83136	0.90317	0.08834	2.32491	6.55569	5.2813	5.89782	0.57694	-0.16914	8.77391	2.85191	3.05753	1.41999	0.10587	1.55936	-2.07656	1.83339	2.59229	5.69091	1.19372	0.34785	2.39228	5.27607	0.76477	3.48524
P126	-0.09682	5.50313	4.24016	1.46908	5.92463	-0.16455	0.95863	3.08043	1.85637	4.86594	5.78242	2.51161	3.67939	0.49061	3.55589	4.91325	-0.23449	1.23449	-0.23677	2.22114	3.96451	1.3851	3.36219	0.83326	0.13719	0.87753	0.33459	2.62377	6.63683	4.97084	5.14486	0.56678	-0.37304	8.35948	2.75441	3.7319	-0.26365	-0.02578	1.97502	-0.86733	1.6919	2.291	5.67744	1.26218	-0.13493	1.82193	4.73337	0.82756	2.53944
P127	0.00928	5.84203	4.96992	1.69944	7.06931	0.43154	0.92997	3.13779	2.38161	6.97937	6.13185	2.54511	3.73078	0.86465	1.06411	5.03646	-0.12666	1.75995	-0.00168	2.46102	4.02025	2.09649	3.83987	0.83726	0.84848	0.9545	1.3239	2.79525	6.81848	5.16349	5.54044	0.76916	-0.77791	9.04016	2.56697	3.81869	0.32129	-0.5205	1.48208	-0.96436	2.4521	2.33485	6.14002	1.48403	0.0823	2.17703	5.126	1.02086	3.13924
P128	-0.22854	6.63669	4.46866	1.9491	5.7581	0.08818	0.65015	2.30175	2.45923	6.48191	6.1289	1.67523	3.74635	0.72699	1.23165	4.4227	-0.29462	1.58202	-0.08992	1.89816	3.86494	2.18927	3.76992	0.98686	0.74334	0.31201	0.34286	2.67102	6.85078	4.62136	5.03865	0.79106	-0.19982	5.23613	2.60843	3.38222	-0.19355	-0.00502	1.67318	-1.19181	2.37773	1.72674	5.24942	1.64638	-0.003	2.30205	5.16087	0.96326	3.67076
P129	0.00639	5.12152	4.29713	1.14771	6.01063	-0.06588	0.34714	2.84257	2.06191	6.60354	6.05504	1.43824	3.30529	0.33742	3.19259	4.5254	-0.37028	1.51417	-0.20334	2.28941	3.433	1.96246	3.97445	1.09218	0.73614	1.61754	-0.01187	2.10481	6.53764	4.78848	5.07914	0.77819	-0.5736	8.92747	2.99437	3.1796	0.02692	-0.6125	1.22377	-1.14953	1.88067	2.68339	5.58141	0.98857	0.11915	2.16116	4.305	1.1001	2.97099
P130	0.04519	4.92322	4.69353	1.47213	6.3277	0.32708	0.73286	2.81513	1.93529	5.58493	5.89888	1.92083	3.18243	0.79898	6.25166	4.36495	0.69864	1.73089	-0.05365	2.66527	3.44347	1.99494	3.28003	0.54488	0.36831	0.92591	1.20511	2.36138	7.04205	5.06829	4.9657	0.96943	-0.4568	7.21779	3.08777	3.29695	0.10656	-0.31414	3.50569	-0.83004	1.77294	3.28638	5.69114	1.39274	0.23181	2.28848	4.47777	2.12409	2.83756
P131	-0.2848	4.56188	4.75001	1.92747	5.99593	0.4041	0.91273	2.98219	1.58193	5.95694	5.41508	2.33787	3.7648	1.22355	0.42018	4.42662	-0.19733	1.71454	0.26054	2.06827	3.79315	2.17342	3.67408	0.29038	0.55569	0.8724	1.18688	2.70986	6.22818	4.90662	5.21345	0.2135	-0.35857	5.90256	2.35872	3.18908	-0.1417	-0.97394	1.39833	-1.53657	1.94105	2.10661	5.90554	1.45704	0.02276	2.14857	4.60009	1.60145	3.14278
P132	0.26083	5.91992	4.68525	1.98543	6.48638	0.11994	0.68675	3.07576	1.84806	5.61476	6.54897	1.86175	3.89212	0.97833	1.20745	4.53284	0.9786	1.53184	-0.10809	2.53235	3.97677	1.82228	3.95256	0.77747	0.81266	0.83755	-0.25027	2.63312	6.7535	5.80822	4.9029	-0.4035	-0.58138	7.0307	2.95875	3.58955	0.03303	-0.14786	1.37928	-1.716	2.94366	2.19768	4.90711	1.17112	-0.05545	2.28959	5.45552	1.096	3.22669
P133	0.07131	5.64257	4.90689	1.8892	6.52737	0.56061	0.56274	3.44394	2.13376	5.22838	6.55267	1.69397	4.15997	1.03563	0.91376	4.4239	-0.04058	1.97045	0.03039	2.87876	4.42975	2.36079	4.58073	0.99141	0.86473	1.01475	0.02684	2.62864	6.72827	5.22781	6.08179	0.40826	-0.39845	7.57305	2.69909	4.13045	-0.01609	-0.77105	1.76752	-0.99238	2.17957	2.145	5.73361	1.37129	0.49766	2.22404	4.78201	0.8836	3.71386
P134	-0.31165	7.37339	4.48019	1.24187	6.13692	0.37547	0.33361	2.68706	2.10565	4.95733	6.31999	2.41274	3.75128	0.55052	0.45917	3.9043	-0.23864	1.54034	-0.35133	1.93245	3.5408	1.97777	3.803	0.79378	0.62807	1.02507	0.49725	2.40503	6.97506	4.81668	5.01978	0.64837	-0.15472	7.74408	2.46736	3.23807	0.93568	0.42513	1.46879	-1.2226	1.6935	2.1228	5.13218	1.41272	0.31855	2.08084	4.39526	0.8052	2.97451
P135	0.34995	5.82836	5.04166	1.7965	6.67982	0.58676	0.71836	2.63134	2.68916	5.1396	6.18875	2.73262	3.31036	2.07709	4.8692	4.5084	0.40946	1.51849	-0.24167	2.38805	3.67245	2.62552	3.87685	1.11857	0.78669	0.7915	0.51393	2.46224	6.70739	6.12324	5.05296	0.34224	-0.1056	8.39475	2.89409	3.20285	0.82116	-0.00868	3.02812	-1.54958	2.10486	3.09809	5.58291	1.29993	0.2408	2.04787	5.79689	1.73869	3.13734
P136	0.13861	5.92768	4.46377	1.91048	6.97137	0.77067	0.75442	3.12964	2.42356	6.33607	6.91954	1.76611	4.22986	1.26303	1.39737	4.38278	-0.18827	2.1276	-0.00205	2.98414	4.26852	2.2868	4.49618	0.93914	1.02748	-0.19952	0.41298	2.55225	7.01262	5.57826	6.06187	0.34266	0.17755	7.42235	2.74674	3.39736	1.11726	-0.48014	1.95869	-1.6316	1.73271	2.34834	5.3845	1.46502	0.21878	2.35001	5.01642	1.21115	3.2676
P137	-0.33405	6.03996	4.43228	1.18738	5.99716	0.23229	0.68652	2.86234	1.47848	5.91954	5.84566	2.06574	3.37021	0.82075	1.04591	3.93363	-0.32338	1.44343	-0.38463	1.62293	3.43055	1.76532	3.4639	0.17166	0.57265	0.93805	0.02684	2.10814	6.43187	4.56912	4.63893	0.11078	-0.40367	5.63417	2.03639	2.79501	0.89082	-0.12092	1.36324	-1.96693	1.45719	1.97649	5.05924	1.03952	0.06477	1.79622	4.54091	0.48777	2.74427
P138	-0.11389	5.37146	4.84046	2.72611	6.13493	0.40147	0.825	2.40991	1.86769	6.05575	5.91084	1.54298	3.84226	0.57471	1.49674	4.45523	-0.25106	1.68725	0.10592	1.5504	4.06519	2.30207	3.68657	0.77491	0.51951	0.49025	0.16162	2.72959	6.89256	4.66197	5.16267	0.47116	-0.56498	6.65666	2.80851	2.89524	0.02984	0.12544	1.71669	-1.09943	2.3318	2.34292	4.29433	1.42439	0.11918	2.20724	4.77712	1.04044	3.66719
P139	0.13066	5.91035	4.69769	1.19124	6.75284	0.16475	0.69886	3.40942	2.38391	4.73311	5.48446	2.52417	4.24193	1.0522	1.75488	3.83636	-0.07444	2.00022	0.19012	1.76898	4.64805	1.96693	3.31885	1.25502	0.80623	0.5156	-0.28296	3.17671	6.73181	4.58688	4.80787	0.27377	-0.45569	9.06879	3.4849	3.21854	0.03737	-0.18671	1.59315	-1.12154	1.5778	3.53496	5.39723	1.14672	0.67995	2.08902	5.39007	1.86082	3.36215
P140	-0.12253	5.5387	4.05532	1.42902	6.31654	-0.03981	0.12514	3.10985	2.20423	5.56249	6.07831	1.99286	3.57446	0.8953	1.04529	4.09032	-0.38887	1.48972	0.0273	1.96568	3.84158	2.0241	3.61829	1.0216	0.32189	1.08933	0.28184	2.48595	6.6204	4.91491	5.32055	0.01707	-0.57685	6.4578	2.49627	3.23251	-0.09911	-0.49771	1.21452	-1.09538	1.74472	1.74399	5.58541	1.3172	0.00997	1.94054	4.64707	1.05614	2.86203
P141	0.32995	7.67481	4.70598	1.53655	6.39246	0.05068	0.59597	2.9829	1.99445	5.53253	6.07251	2.16527	3.73313	0.60248	2.01582	4.71698	-0.16206	1.65673	-0.14474	2.28559	3.96416	2.09131	3.70456	1.20816	0.54084	0.30598	0.02195	2.66855	6.75473	5.20852	5.12794	0.00175	-0.45135	7.16606	3.01595	3.47123	-0.01378	0.79546	1.57183	-1.26533	3.4415	2.50403	5.85205	1.20708	0.04778	1.97053	4.99049	1.06194	3.25219
P142	0.81792	6.70165	4.85905	1.72938	6.47586	0.28424	0.96203	3.18025	2.32493	5.91043	6.71079	2.03282	4.31304	1.48265	1.69374	4.36723	-0.11189	1.82321	0.12843	2.42502	4.26807	2.20587	4.35707	0.80805	0.54253	0.40484	0.97635	2.44422	6.21974	4.23497	6.39377	0.35959	-0.56604	6.34572	3.15088	3.55879	0.33596	0.53848	1.79268	-0.86995	2.10364	1.75753	5.67244	1.43071	0.17608	2.38712	5.34111	1.79112	3.68855
P144	0.02415	6.61698	4.58085	1.45329	6.56771	0.36825	0.42595	2.25914	1.87118	5.58666	6.25904	2.00851	3.27434	0.59363	4.41818	3.90901	-0.03358	1.29165	-0.19461	1.81631	3.42546	2.31812	3.13986	0.71204	0.13845	0.21544	0.17562	2.14518	6.16551	4.26573	5.06895	0.47143	-0.56665	8.07177	2.81817	2.66856	0.16084	0.25246	1.78994	-0.99928	1.73717	2.3478	5.29171	1.24579	0.17758	1.64451	5.19656	1.21076	3.25947
P145	0.09849	5.48829	4.61489	1.14795	5.85323	-0.02787	0.84855	2.42638	1.91866	5.20253	6.37321	1.64643	3.29215	1.04517	0.79154	4.01892	-0.55079	1.49911	0.04063	1.91283	3.57427	1.72971	3.19149	0.71242	0.04404	0.65847	0.06088	2.27878	6.11154	4.54061	5.21837	0.27207	-0.45508	6.98581	2.31058	3.02611	0.19063	-0.41611	1.48507	-1.06515	1.55242	1.98014	5.31897	0.94063	0.24586	1.89821	4.64101	1.0499	3.25285
P146	0.4618	5.63373	4.57102	1.49356	6.11752	-0.15169	0.49461	2.73002	2.04816	5.07773	6.19072	1.80611	3.38752	0.9923	0.93119	4.20365	-0.17058	1.53613	-0.12436	2.03468	3.97014	1.46078	3.80878	0.65394	0.83259	1.00298	-0.68752	2.35468	6.22808	4.75823	5.38865	0.46777	-0.54662	5.18179	2.723	3.4118	0.10891	0.02574	1.66818	-1.75301	2.72695	1.95456	5.09349	1.10025	0.34081	2.07291	4.49422	0.67721	2.93811
P147	0.12908	6.07448	4.60415	1.51232	6.08283	0.12592	0.58062	2.78175	1.29316	5.10468	5.82821	1.5775	3.62213	1.53745	1.14645	4.33036	-0.35131	1.55087	-0.11284	1.77547	3.79791	2.06957	3.40229	0.50045	0.4461	0.82908	0.23298	2.05144	5.98115	4.72491	5.37145	0.21565	-0.52906	7.16632	2.68898	3.95586	0.02158	-0.30521	1.54347	-1.46858	1.43914	1.72871	5.1113	1.08315	0.22545	1.64621	4.65274	1.06914	3.04276
P148	-0.00592	5.91703	4.00362	1.06859	5.65852	0.07755	0.45894	2.47131	0.88488	4.7146	5.54441	1.10039	3.21088	0.61119	0.63395	3.25203	-0.37958	1.03148	-0.13927	1.2355	3.03016	1.70467	3.04585	0.71192	0.36363	1.01834	0.1587	1.7353	5.66303	4.21121	4.71307	0.39545	-0.81812	5.90933	1.86567	2.50884	-0.03967	-0.07247	1.14622	-1.04551	1.18231	1.55597	5.04539	0.71781	-0.1524	0.97927	4.05931	-0.01363	2.89351
P149	-0.09739	4.36968	4.55441	1.57886	5.9562	0.32145	0.98841	2.25463	1.92604	6.05118	6.03824	1.47039	3.47873	1.44192	1.80452	4.21828	0.08885	1.44142	0.1746	2.62923	3.72959	2.02917	3.85732	0.6913	0.92886	1.22874	1.38766	2.46615	6.32671	4.55504	6.15792	0.25578	-0.6691	5.91058	2.2188	3.2673	0.13674	-0.57858	1.54162	-1.398	1.97864	1.82411	5.05799	1.63445	0.18146	1.75935	4.67376	1.46747	3.41675
P150	-0.03714	3.99836	4.11222	1.42939	5.72342	-0.03294	0.68068	2.29179	0.85452	5.2952	5.17901	1.68606	2.88091	0.58684	1.55973	3.71078	0.08706	1.29544	-0.18789	1.70364	3.0509	1.75532	3.07422	0.66677	0.91852	0.89799	0.37178	1.77302	5.5387	4.34921	5.01364	0.17652	-0.63086	7.82471	1.92326	2.81358	-0.14761	-0.46046	1.0932	-1.39903	1.77093	1.57645	4.92339	0.75585	-0.16121	1.11715	3.95509	1.17716	2.6653
LOD	0.7437	-0.33456	0.09152	0.38027	1.08177	-0.47323	0.73911	0.23521	-0.92275	0.74939	0.14414	0.00237	0.36914	-0.48588	-0.05921	0.58921	-0.25159	0.12066	-0.65859	-0.4606	0.28193	0.74087	-0.05749	-0.4009	0.17635	1.56055	0.1562	-0.27611	-0.37897	-0.77397	-0.12104	0.37703	-0.89089	-0.95838	0.17512	-0.20221	1.38839	0.26673	0.09456	-0.61316	0.18498	0.13541	-0.1601	-0.03477	0.15035	1.36608	0.37238	0.96036	-0.27422
Missing Data freq.	0.96	0	0	0	0	0	0.53	0	0	0	0	0	0	0	0	0	0.32	0	0	0	0	0	0	0	0.03	0.95	0.42	0	0	0	0	0.41	0.09	0	0	0	0.97	0.84	0	0.97	0	0	0	0	0.22	0.03	0	0.19	0
[truncated: 891 more columns]
