# Supplementary material for: Robust prognostic signatures derived from proteomic panel profiling of plasma from patients with severe COVID-19 complications
Source: Research Square preprint supplement (doi:10.21203/rs.3.rs-126482/v1), 2021-03-08
Supplement: Supplementary file 5 [file d75a82eaa13a7b833dafe19a.xlsx]

## Sheet: Table S4
Table S4: Drug-Protein Interactions (DPI) for proteins with > 1.5-fold upregulation in severe versus mild cases. Only FDA approved drugs included.
Target	Drug	Interaction type	Sources	References PMID from DGIdb	Drug Class	Highlighted drugs interact/inhibit multiple upregulated protein targets							agonist	≥ 2-fold up
LDLR	CORTICOTROPIN		NCI	11956163	Corticosteroid
THBS2	CORTICOTROPIN		NCI	8698834	Corticosteroid
IGFBP1	DEXAMETHASONE		NCI	7683312|1714534	Corticosteroid
KRT19	DEXAMETHASONE		NCI	15793288	Corticosteroid
VCAM1	DEXAMETHASONE		NCI	7694584	Corticosteroid
CXCL10	METHYLPREDNISOLONE		NCI	17220550	Corticosteroid
IL2RA	METHYLPREDNISOLONE		NCI	8981122	Corticosteroid
CALCA	PREDNISONE		NCI	11475715	Glucocorticoid
VWF	PREDNISONE		NCI	3146197	Glucocorticoid
IL2RA	DIDANOSINE		NCI	1774603	Anti-viral
TNFRSF1B	DIDANOSINE		NCI	9430255	Anti-viral
CST3	RIBAVIRIN		NCI	18637076	Anti-viral
VWF	RIBAVIRIN		NCI	15644045	Anti-viral
CXCL10	STAVUDINE		NCI	11141242	Anti-viral
TNFRSF1B	STAVUDINE		NCI	9430255	Anti-viral
CXCL10	ZIDOVUDINE		NCI	11141242	Anti-viral
IL10	ZIDOVUDINE		NCI	10433557	Anti-viral
LDLR	ZIDOVUDINE		NCI	8211145	Anti-viral
MMP7	DOXYCYCLINE	inhibitor	GuideToPharmacologyInteractions		Antibiotic
MPO	DOXYCYCLINE		NCI	14564835	Antibiotic
IL10	MESALAMINE		NCI	15887108	Anti-inflammatory
MPO	MESALAMINE		DrugBank	17503181	Anti-inflammatory
CD274	ATEZOLIZUMAB	inhibitor|antibody	MyCancerGenome|ChemblInteractions|CGI|CIViC|DrugBank|CancerCommons|FDA	26970723|26918451|28472902	Immune checkpoint inhibitor
CX3CL1	ATEZOLIZUMAB		CIViC	25428504	Immune checkpoint inhibitor
IL1R1	ANAKINRA	inhibitor|antagonist	TdgClinicalTrial|GuideToPharmacologyInteractions|ChemblInteractions|NCI|TEND|DrugBank|TTD	17083033|9555664|12355453|12817089|10210771|17498496|17352828|11752352	Immunosuppressive
IL1R2	ANAKINRA		TEND		Immunosuppressive
IL15	CYCLOSPORINE		NCI	11571455|10679127|11817607|11683823	Immunosuppressive
VCAM1	CYCLOSPORINE		NCI	7694584	Immunosuppressive
VCAN	CYCLOSPORINE		NCI	14974815	Immunosuppressive
ACP5	FILGRASTIM		NCI	1724107	Immunosuppressive
MPO	FILGRASTIM		NCI	9287329	Immunosuppressive
PLAUR	FILGRASTIM		NCI	15747404	Immunosuppressive
HGF	METHOTREXATE		NCI	10732770	Immunosuppressive
S100A12	METHOTREXATE		NCI	15077313	Immunosuppressive
SULT2A1	METHOTREXATE		NCI	17163485	Immunosuppressive
IL15	MYCOPHENOLATE MOFETIL		NCI	12070425	Immunosuppressive
PRTN3	MYCOPHENOLATE MOFETIL		NCI	10471756	Immunosuppressive
FAS	MYCOPHENOLIC ACID		NCI	14659903	Immunosuppressive
TYMP	MYCOPHENOLIC ACID		NCI	12711006	Immunosuppressive
DCN	SIROLIMUS		NCI	17200203	Immunosuppressive
FKBP4	SIROLIMUS		NCI	1700475	Immunosuppressive
IGFBP1	SIROLIMUS		NCI	11942857	Immunosuppressive
IL10	SIROLIMUS		NCI	12907620	Immunosuppressive
IL15	SIROLIMUS		NCI	14605212	Immunosuppressive
F2R	THALIDOMIDE		NCI	14995997	Immunosuppressive
HGF	THALIDOMIDE		NCI	15939924	Immunosuppressive
IL6R	THALIDOMIDE		NCI	12515619	Immunosuppressive
VWF	THALIDOMIDE		NCI	12871448	Immunosuppressive
F2R	DALTEPARIN SODIUM		NCI	12632026	Anti-coagulant/Thrombolytic
TFPI	DALTEPARIN SODIUM	inhibitor	DrugBank	20682597|15179449|10847421	Anti-coagulant/Thrombolytic
LRP1	TENECTEPLASE		DrugBank	16303771|8344937|1378833	Anti-coagulant/Thrombolytic
MPO	TENECTEPLASE		NCI	16650886	Anti-coagulant/Thrombolytic
PLAUR	TENECTEPLASE		DrugBank	15231724|11447759|12210068	Anti-coagulant/Thrombolytic
NID1	UROKINASE		DrugBank	1499567|17139284|17016423	Anti-coagulant/Thrombolytic
PLAT	UROKINASE		TdgClinicalTrial|DrugBank	12893898|14507109|12787697|12745435|12826021	Anti-coagulant/Thrombolytic
PLAUR	UROKINASE		TdgClinicalTrial|DrugBank	14679304|14720519|17327908|12817472|12615913|14688365	Anti-coagulant/Thrombolytic
F2R	VORAPAXAR	antagonist	TdgClinicalTrial|GuideToPharmacologyInteractions|DrugBank|TTD	19715408	Anti-coagulant/Thrombolytic
F2R	VORAPAXAR SULFATE	antagonist	ChemblInteractions		Anti-coagulant/Thrombolytic
ACE2	FLUTAMIDE		GuideToPharmacologyInteractions		NSAA
IL2RA	FLUTAMIDE		NCI	11312147	NSAA
MPO	FLUTAMIDE		NCI	16330533	NSAA
F2R	ASPIRIN		NCI	15381054	NSAID
FAS	ASPIRIN		NCI	15200494	NSAID
HGF	ASPIRIN		NCI	11981761	NSAID
HMOX1	ASPIRIN		NCI	12927812	NSAID
GDF15	DICLOFENAC		NCI	15555568	NSAID
MPO	DICLOFENAC		NCI	2173589	NSAID
ADM	INDOMETHACIN		NCI	10830296	NSAID
FST	INDOMETHACIN		NCI	15941869	NSAID
IL15	MEGESTROL ACETATE		NCI	15345738	Steroid
IL2RA	MEGESTROL ACETATE		NCI	8562975	Steroid
IL1R1	OXANDROLONE	antagonist	GuideToPharmacologyInteractions		Steroid
SULT2A1	OXANDROLONE		NCI	8319371	Steroid
CXCL10	TESTOSTERONE		NCI	9681518	Steroid
FAS	TESTOSTERONE		NCI	10809356	Steroid
TNFRSF11B	TESTOSTERONE		NCI	11932280	Steroid
CA3	ISOTRETINOIN		NCI	1361281	Retinoids
IL2RA	ISOTRETINOIN		NCI	8952316	Retinoids
FAS	TRETINOIN		NCI	9792441	Retinoids
IL10	TRETINOIN		NCI	8982293	Retinoids
IL1R1	TRETINOIN		NCI	2465548	Retinoids
NPM1	TRETINOIN		CIViC	19965647|21719597	Retinoids
SPP1	TRETINOIN		NCI	9224725	Retinoids
FAS	VITAMIN K		NCI	10930097	Vitamin
IL6	VITAMIN K		NCI	12053098	Vitamin
F2R	ALPROSTADIL		NCI	7822278	Blood pressure
THBD	ALPROSTADIL		NCI	7684300	Blood pressure
NPPB	CARVEDILOL	other	DrugBank	15864245|15325927|11401111|11206715|14692707	Blood pressure
VCAM1	CARVEDILOL	inhibitor	DrugBank	17139284|15374848|17016423	Blood pressure
IL2RA	VERAPAMIL		NCI	2645720	Blood pressure
LDLR	VERAPAMIL		NCI	7683421	Blood pressure
CXCL10	ATORVASTATIN		NCI	10559511	Cholesterol/blood lipids
FAS	ATORVASTATIN		NCI	16796407	Cholesterol/blood lipids
IL2RA	ATORVASTATIN		NCI	16207471	Cholesterol/blood lipids
PLAT	ATORVASTATIN		NCI	17130267	Cholesterol/blood lipids
TFPI	ATORVASTATIN		NCI	15792677	Cholesterol/blood lipids
IL6	GEMFIBROZIL		NCI	8941582	Cholesterol/blood lipids
LDLR	GEMFIBROZIL		NCI	9409246	Cholesterol/blood lipids
FAS	ARSENIC TRIOXIDE		NCI	14719092	Chemotherapeutic
IL6	ARSENIC TRIOXIDE		NCI	16638192	Chemotherapeutic
FAS	CYCLOPHOSPHAMIDE		NCI	11437491	Chemotherapeutic
TNFRSF1A	CYCLOPHOSPHAMIDE		NCI	9894568	Chemotherapeutic
TFPI	DACTINOMYCIN		NCI	9851943	Chemotherapeutic
TNFRSF1B	DACTINOMYCIN		NCI	11125300	Chemotherapeutic
FAS	DAUNORUBICIN		NCI	10216102	Chemotherapeutic
NPM1	DAUNORUBICIN		CGI		Chemotherapeutic
DKK1	FLUOROURACIL		CIViC	25788273	Chemotherapeutic
FAS	FLUOROURACIL		NCI	12845662	Chemotherapeutic
IL2RA	FLUOROURACIL		NCI	9238541	Chemotherapeutic
IL6R	FLUOROURACIL		NCI	8888499	Chemotherapeutic
TYMP	FLUOROURACIL		PharmGKB|NCI	11205264	Chemotherapeutic
IL2RA	MERCAPTOPURINE		NCI	1580639	Chemotherapeutic
VCAM1	MERCAPTOPURINE		NCI	7694584	Chemotherapeutic
CXCL10	OXALIPLATIN		NCI	16101140	Chemotherapeutic
DKK1	OXALIPLATIN		CIViC	25788273	Chemotherapeutic
IL2RA	PACLITAXEL		NCI	16595340	Chemotherapeutic
PDGFRA	PACLITAXEL		CKB	28514312	Chemotherapeutic
ACP5	STREPTOZOTOCIN		NCI	14640894	Chemotherapeutic
CD40	STREPTOZOTOCIN		NCI	15016184|11937525	Chemotherapeutic
HGF	STREPTOZOTOCIN		NCI	12403787	Chemotherapeutic
IGFBP1	STREPTOZOTOCIN		NCI	1713293|7589849	Chemotherapeutic
VWF	STREPTOZOTOCIN		NCI	16422885|3928783	Chemotherapeutic
F2R	BEVACIZUMAB		NCI	12554695	Kinase inhibitor
MMP9	BEVACIZUMAB		CIViC	26921265	Kinase inhibitor
THBS2	BEVACIZUMAB		NCI	16365183	Kinase inhibitor
AREG	CRIZOTINIB		CIViC	21791641	Kinase inhibitor
NPM1	CRIZOTINIB		CKB	27009859|25749034|24509625|18089725|25421750	Kinase inhibitor
HMOX1	SORAFENIB		CIViC	26309414	Kinase inhibitor
PDGFRA	SORAFENIB	inhibitor	MyCancerGenomeClinicalTrial		Kinase inhibitor
HMOX1	SUNITINIB		CIViC	26309414	Kinase inhibitor
PDGFRA	SUNITINIB	inhibitor	TdgClinicalTrial|CKB|CGI|CIViC|TEND|DrugBank|DoCM|MyCancerGenomeClinicalTrial	15928335|15685537|19366796|22718859|16638875|15146165|18955458|12949711|26130666|25157968|14645423|16954519|18794084|22745105	Kinase inhibitor
LDLR	ACETYLCYSTEINE		NCI	12031897	Other
VWF	ACETYLCYSTEINE		NCI	15753537	Other
F2R	ALCOHOL		NCI	16930224	Other
IGFBP1	ALCOHOL		NCI	11894976	Other
IL1R1	ALCOHOL		NCI	16272348	Other
DCN	ASCORBATE		NCI	7944410	Other
HSPB1	ASCORBATE		NCI	12473058	Other
CXCL10	ATROPINE		NCI	15315164	Other
F2R	ATROPINE		NCI	15345469	Other
CPB1	CITRIC ACID		DrugBank		Other
RNASE3	CITRIC ACID		DrugBank	17139284|17016423	Other
MB	DEXTROSE		DrugBank	10592235|17139284|17016423	Other
SFTPD	DEXTROSE		DrugBank	17139284|17016423	Other
SIGLEC1	DEXTROSE		DrugBank	10592235	Other
IL1R1	EPOETIN ALFA		NCI	16337691	Other
LDLR	EPOETIN ALFA		NCI	9249773	Other
CA3	ETHOXZOLAMIDE	inhibitor	ChemblInteractions		Other
CA5A	ETHOXZOLAMIDE	inhibitor	ChemblInteractions		Other
IL6	FENTANYL		NCI	9527747	Other
MPO	FENTANYL		NCI	8391745	Other
CXCL10	GONADOTROPIN, CHORIONIC		NCI	15590984	Other
HGF	GONADOTROPIN, CHORIONIC		NCI	16885537	Other
IL2RA	GONADOTROPIN, CHORIONIC		NCI	9334854	Other
MSR1	HYDROGEN PEROXIDE		NCI	15316030	Other
TNFRSF10A	HYDROGEN PEROXIDE		NCI	18299966	Other
CES1	LEVOCARNITINE		DrugBank	6509906	Other
MPO	LEVOCARNITINE		DrugBank	16130180	Other
CPA1	METHYLENE BLUE		DrugBank	10592235	Other
MPO	METHYLENE BLUE		NCI	16490992	Other
VWF	METHYLENE BLUE		NCI	15043592	Other
F2R	MORPHINE		NCI	12373743	Other
HMOX2	MORPHINE		NCI	14580950|10686338	Other
IGFBP1	OCTREOTIDE		NCI	9512248|7525123	Other
MPO	OCTREOTIDE		NCI	15003363	Other
IL2RA	THEOPHYLLINE		NCI	3129507	Other
MPO	THEOPHYLLINE		NCI	8630596	Other
CD38	THROMBIN		NCI	9654134	Other
F2R	THROMBIN		NCI	15559761|15280447|11504518|10027305|15383630|12707033|11841573|15386385|14699102	Other
FAS	THROMBIN		NCI	16271051	Other
SPP1	ZOLEDRONIC ACID		PharmGKB		Other
TNFRSF11A	ZOLEDRONIC ACID		PharmGKB		Other
TNFRSF11B	ZOLEDRONIC ACID		PharmGKB		Other
CA3	ZONISAMIDE	inhibitor	DrugBank	17762320|18537527|19703035|18782051|17582922|18162396	Other
CA5A	ZONISAMIDE	inhibitor	DrugBank	15837316|17762320|18537527|19703035|18782051|17582922	Other
IL17RB	FLUPREDNISOLONE	agonist	GuideToPharmacologyInteractions		Corticosteroid
IL17RB	METHYLPREDNISOLONE ACETATE	agonist	GuideToPharmacologyInteractions		Corticosteroid
PDGFRA	BECAPLERMIN	agonist	TdgClinicalTrial|ChemblInteractions|TEND|DrugBank	7665222|1702511|10070317|14506245|12632922	Kinase inhibitor
F2R	HYDROXYCHLOROQUINE	agonist	GuideToPharmacologyInteractions		Other
F2R	KETOCONAZOLE	agonist	GuideToPharmacologyInteractions		Other
LEPR	METRELEPTIN	agonist	ChemblInteractions|DrugBank	25249580	Other
IL6R	OPRELVEKIN	agonist	GuideToPharmacologyInteractions		Anti-coagulant/Thrombolytic
HMOX2	BETAMETHASONE		NCI	11698254	Corticosteroid
IL2RA	BECLOMETHASONE DIPROPIONATE		NCI	9314351	Glucocorticoid
IL10	FLUTICASONE PROPIONATE		NCI	12372131	Glucocorticoid
IL6	INTERFERON ALFA-2B		NCI	10022737	Interferons
IL2RA	INTERFERON BETA-1B		NCI	9762669	Interferons
PLAUR	INTERFERON GAMA-1B		NCI	8049441	Interferons
IL10	ACYCLOVIR		NCI	16961277	Anti-viral
IL6	NELFINAVIR		NCI	15388451	Anti-viral
CXCL10	RITONAVIR		NCI	11141242	Anti-viral
IL6	SAQUINAVIR		NCI	15388451	Anti-viral
F2R	ARGATROBAN		NCI	10611442	Anti-coagulant/Thrombolytic
THBD	CILOSTAZOL		NCI	10918946	Anti-coagulant/Thrombolytic
CES1	CLOPIDOGREL		PharmGKB		Anti-coagulant/Thrombolytic
PLAT	CONESTAT ALFA	inhibitor|Inhibitor	DrugBank	16267649	Anti-coagulant/Thrombolytic
TFPI	DEFIBROTIDE		NCI	11441984	Anti-coagulant/Thrombolytic
LDLR	HEPARIN CALCIUM		NCI	17322644	Anti-coagulant/Thrombolytic
TFPI	HEPARIN SODIUM		NCI	9101641	Anti-coagulant/Thrombolytic
VWF	WARFARIN		NCI	7626351	Anti-coagulant/Thrombolytic
S100A12	AMLEXANOX	antagonist	DrugBank	11944917|16864903|10051426	Anti-inflammatory
TNFRSF1B	ETANERCEPT		DrugBank	11752352	Anti-inflammatory
TYMP	SULFASALAZINE		NCI	15269287	Anti-inflammatory
CD274	AVELUMAB	antibody	MyCancerGenome|ChemblInteractions|CIViC|FDA	26918451|28472902	Immune checkpoint inhibitor
CD274	NIVOLUMAB		CGI|CIViC	26918451|26086854|28472902	Immune checkpoint inhibitor
CD274	PEMBROLIZUMAB		CGI|CIViC|FDA	26918451|26086854|27718847|28472902|25891174	Immune checkpoint inhibitor
IL2RA	BASILIXIMAB	inhibitor|antibody	TdgClinicalTrial|ChemblInteractions|TEND|DrugBank	12591363|16908318|10567956|9695721|11752352|10512062	Immunosuppressive
IL2RA	CETIRIZINE		NCI	7591422	Immunosuppressive
IL2RA	DACLIZUMAB	inhibitor|antibody	TdgClinicalTrial|ChemblInteractions|TEND|DrugBank	16908318|19788505|16304857|11752352|8600944|10607689|17564638	Immunosuppressive
CD38	DARATUMUMAB	inhibitor|antibody	MyCancerGenome|GuideToPharmacologyInteractions|ChemblInteractions		Immunosuppressive
IL2RA	DENILEUKIN DIFTITOX	binder	PharmGKB|TdgClinicalTrial|ChemblInteractions|TEND|DrugBank|FDA	18684057|3124610|17187516|2786749|11752352|17139284|17016423	Immunosuppressive
IL4R	DUPILUMAB	antagonist	ChemblInteractions		Immunosuppressive
IL2RA	HUMAN INTERLEUKIN-2	modulator|agonist	TdgClinicalTrial|ChemblInteractions|TEND|DrugBank	17584597|16767920|10207608|16864089|11752352|17216565|17530023	Immunosuppressive
MPO	LORATADINE		NCI	17159802	Immunosuppressive
VWF	PHENYLEPHRINE		NCI	16996954	Immunosuppressive
IL6	SILTUXIMAB	inhibitor|antibody|antagonist	MyCancerGenome|ChemblInteractions|DrugBank	8823310	Immunosuppressive
SPP1	TACROLIMUS		NCI	16103732	Immunosuppressive
IL6R	TOCILIZUMAB	inhibitor|antibody	MyCancerGenome|TdgClinicalTrial|GuideToPharmacologyInteractions|ChemblInteractions|TEND|DrugBank|TTD	16899109	Immunosuppressive
FST	BICALUTAMIDE		NCI	14761877	NSAA
CTSL	FELBINAC		DrugBank	10592235	NSAID
PLAT	NAPROXEN		NCI	1908176	NSAID
MPO	NIMESULIDE		NCI	17176264	NSAID
TNFRSF10A	SULINDAC		NCI	16030090	NSAID
MPO	TOLMETIN		NCI	6266970	NSAID
DCN	TROMETHAMINE		DrugBank	10592235|17139284|17016423	NSAID
PLAUR	ALTEPLASE		DrugBank	17139284|17016423	Anti-coagulant/Thrombolytic
PLAUR	ANISTREPLASE		DrugBank	17139284|17016423	Anti-coagulant/Thrombolytic
PLAT	ILOPROST		DrugBank	1689620|1370924|1726988|1717784|17510465	Anti-coagulant/Thrombolytic
F2R	LEPIRUDIN		NCI	16038707	Anti-coagulant/Thrombolytic
VWF	PENTOXIFYLLINE		NCI	1719289	Anti-coagulant/Thrombolytic
PLAUR	RETEPLASE		DrugBank	17139284|17016423	Anti-coagulant/Thrombolytic
F2R	STREPTOKINASE	cleavage	DrugBank	10666203	Anti-coagulant/Thrombolytic
REN	ALISKIREN	inhibitor	TdgClinicalTrial|GuideToPharmacologyInteractions|TEND|DrugBank|TTD	11799102|16965731|16467656|11752352|12927775|16508564	Blood pressure
REN	ALISKIREN FUMARATE	inhibitor	ChemblInteractions		Blood pressure
ASGR1	AMILORIDE	channel blocker	GuideToPharmacologyInteractions		Blood pressure
MMP9	CAPTOPRIL	inhibitor	DrugBank	12381651|19057128|15993560|18501888	Blood pressure
CST3	DIGOXIN		NCI	17698593	Blood pressure
MPO	LIDOCAINE		NCI	8973808	Blood pressure
ACE2	LISINOPRIL	inhibitor	TdgClinicalTrial|DrugBank	11030016|11929321|11752352|1536695	Blood pressure
MMP9	METHYLDOPA		PharmGKB		Blood pressure
MMP9	NIFEDIPINE		PharmGKB		Blood pressure
ASGR1	TRIAMTERENE	channel blocker	GuideToPharmacologyInteractions		Blood pressure
HSPB1	VASOPRESSIN		NCI	9925748	Blood pressure
PCSK9	Alirocumab	inhibitor	TdgClinicalTrial|GuideToPharmacologyInteractions|ChemblInteractions|DrugBank	26455563	Cholesterol/blood lipids
LDLR	CHOLESTYRAMINE		NCI	2110363	Cholesterol/blood lipids
LDLR	COLESTIPOL HYDROCHLORIDE		NCI	2642754	Cholesterol/blood lipids
PCSK9	EVOLOCUMAB	inhibitor	GuideToPharmacologyInteractions|ChemblInteractions		Cholesterol/blood lipids
TFPI	FENOFIBRATE		NCI	15543343	Cholesterol/blood lipids
TFPI	LOVASTATIN		NCI	7600119	Cholesterol/blood lipids
CES1	PROBUCOL		DrugBank	16292755	Cholesterol/blood lipids
THBD	SIMVASTATIN		NCI	18663903	Cholesterol/blood lipids
LDLR	SOYBEAN OIL		NCI	2065036	Cholesterol/blood lipids
IL10	AMOXICILLIN		NCI	16815316	Antibiotic
TFPI	AZITHROMYCIN		NCI	16113783	Antibiotic
MPO	CEFDINIR	inhibitor	DrugBank	8133056	Antibiotic
IL10	CLARITHROMYCIN		NCI	16815316	Antibiotic
MMP7	DOXYCYCLINE CALCIUM	inhibitor	ChemblInteractions		Antibiotic
MMP7	DOXYCYCLINE HYCLATE	inhibitor	ChemblInteractions		Antibiotic
MMP7	DOXYCYCLINE HYDRATE	inhibitor	ChemblInteractions		Antibiotic
SPP1	GENTAMICIN		NCI	11274264	Antibiotic
CES1	ISONIAZID		PharmGKB		Antibiotic
IL6	LEVOFLOXACIN		NCI	12714806	Antibiotic
IL6	LINEZOLID		NCI	14561977	Antibiotic
IL6	METRONIDAZOLE		NCI	12111578	Antibiotic
MPO	TRIMETHOPRIM		NCI	7425598	Antibiotic
LDLR	RETINOL		NCI	2920014	Retinoids
CCL7	MIFEPRISTONE		NCI	15214937	Steroid
CALCA	NANDROLONE PHENPROPIONATE		NCI	17964731	Steroid
NPPB	OXYMETHOLONE		DrugBank		Steroid
SULT2A1	PRASTERONE		DrugBank	10592235|17139284|17016423	Steroid
IL2RA	PROGESTERONE		NCI	12405159	Steroid
CALCA	TESTOSTERONE PROPIONATE		NCI	16447649	Steroid
F2R	BLEOMYCIN (CHEMBL3039590)		NCI	15855637	Chemotherapeutic
CES1	CAPECITABINE		PharmGKB		Chemotherapeutic
PDGFRA	CARBOPLATIN		CKB	28514312	Chemotherapeutic
IL2RA	CLADRIBINE		NCI	9619876	Chemotherapeutic
ASGR1	DACARBAZINE	activator	GuideToPharmacologyInteractions		Chemotherapeutic
IL2RA	DECITABINE		NCI	15814281	Chemotherapeutic
GDF15	ETOPOSIDE		NCI	10618379	Chemotherapeutic
FAS	FLOXURIDINE		NCI	11115403	Chemotherapeutic
IL6	IFOSFAMIDE		NCI	9260581	Chemotherapeutic
DKK1	IRINOTECAN		CIViC	25788273	Chemotherapeutic
NPM1	IXAZOMIB		CKB	26634271	Chemotherapeutic
DKK1	LEVOLEUCOVORIN		CIViC	25788273	Chemotherapeutic
THBD	LEVOTHYROXINE		NCI	14763909	Chemotherapeutic
PLAT	MELPHALAN		NCI	9031449	Chemotherapeutic
VWF	MITOMYCIN		NCI	2104558	Chemotherapeutic
TFF3	TAMOXIFEN		CIViC	25900183	Chemotherapeutic
FAS	TENIPOSIDE		NCI	9543255	Chemotherapeutic
TYMP	TIPIRACIL		DrugBank		Chemotherapeutic
TYMP	TIPIRACIL HYDROCHLORIDE	inhibitor	ChemblInteractions		Chemotherapeutic
VWF	VINCRISTINE		NCI	3875694	Chemotherapeutic
NPM1	ALECTINIB		CKB	27009859|25749034|25421750	Kinase inhibitor
PDGFRA	AXITINIB		TdgClinicalTrial		Kinase inhibitor
HGF	CABOZANTINIB		CGI		Kinase inhibitor
NPM1	CERITINIB		CKB	27009859|25749034|25421750	Kinase inhibitor
AREG	CETUXIMAB		CIViC	23374602	Kinase inhibitor
PDGFRA	DASATINIB		OncoKB|CKB|CGI|DoCM	22328973|15928335|15685537|22718859|16638875|15146165|17419150|12949711|26130666|25157968|14645423|16954519|18794084|22745105	Kinase inhibitor
PDGFRA	GEFITINIB		CKB	22323597	Kinase inhibitor
PDGFRA	IMATINIB	inhibitor	MyCancerGenome|TdgClinicalTrial|OncoKB|CKB|CGI|CIViC|TEND|DoCM|FDA	23752188|22328973|15928335|15034867|16845659|19212337|12944919|15685537|21224473|22718859|16638875|15146165|12781364|24963404|28514312|16357008|18955458|12949711|12660384|17555450|16754777|25658984|14504092|16498388|26130666|25157968|24407160|24132921|14645423|22323597|16954519|24456122|18794084|22745105|17087936|25905001|27021554	Kinase inhibitor
PDGFRA	LENVATINIB		TdgClinicalTrial		Kinase inhibitor
PDGFRA	NILOTINIB	inhibitor	CKB|MyCancerGenomeClinicalTrial	18794084	Kinase inhibitor
PDGFRA	NINTEDANIB	inhibitor	TALC|MyCancerGenome|TdgClinicalTrial|ClearityFoundationClinicalTrial|GuideToPharmacologyInteractions		Kinase inhibitor
PDGFRA	NINTEDANIB ESYLATE	inhibitor	ChemblInteractions		Kinase inhibitor
PDGFRA	OLARATUMAB	antagonist|antibody	MyCancerGenome|TdgClinicalTrial|GuideToPharmacologyInteractions|ChemblInteractions|DrugBank|FDA	27291995|24816152	Kinase inhibitor
AREG	PANITUMUMAB		CIViC	26867820	Kinase inhibitor
PDGFRA	PAZOPANIB	inhibitor	TALC|MyCancerGenome|DrugBank|MyCancerGenomeClinicalTrial	17288876	Kinase inhibitor
PDGFRA	PAZOPANIB HYDROCHLORIDE	inhibitor	ChemblInteractions		Kinase inhibitor
PDGFRA	PONATINIB	inhibitor	CKB|CIViC|DrugBank	22328973|19878872|24407160	Kinase inhibitor
PDGFRA	RAMUCIRUMAB	antibody	TALC|MyCancerGenome		Kinase inhibitor
PDGFRA	REGORAFENIB	inhibitor	CKB|ChemblInteractions|CGI|DrugBank|MyCancerGenomeClinicalTrial	25905001	Kinase inhibitor
MME	SACUBITRIL	inhibitor|antagonist	ChemblInteractions|DrugBank		Kinase inhibitor
PDGFRA	SORAFENIB TOSYLATE	inhibitor	MyCancerGenomeClinicalTrial		Kinase inhibitor
PDGFRA	SUNITINIB MALATE	inhibitor	ChemblInteractions		Kinase inhibitor
HGF	TRASTUZUMAB		CGI		Kinase inhibitor
EPHB4	VANDETANIB	inhibitor	ChemblInteractions		Kinase inhibitor
CA3	ACETAZOLAMIDE		NCI	1909176	Other
PLAT	AMINOCAPROIC ACID	inhibitor|antagonist	ChemblInteractions|DrugBank	8073394|7962113|2502209|3146348	Other
TFF3	AMINOGLUTETHIMIDE		CIViC	25900183	Other
LDLR	ATENOLOL		PharmGKB|NCI	15453913	Other
PDGFRA	BENZONATATE		CKB	25805799	Other
CA5A	BRINZOLAMIDE	inhibitor	DrugBank	14971907	Other
IGFBP1	BUSERELIN		NCI	7544746	Other
IL2RA	CAFFEINE		NCI	3129507	Other
SPP1	CALCITONIN		NCI	8013390	Other
GDF15	CALCITRIOL		NCI	15386353	Other
TNFRSF1B	CARBAMAZEPINE		NCI	15565432	Other
MME	CARTEOLOL	inhibitor	GuideToPharmacologyInteractions		Other
CES1	CHOLIC ACID		DrugBank	10592235	Other
FKBP5	CLOMIPRAMINE		PharmGKB		Other
CES1	CYCLANDELATE		DrugBank	2306268	Other
MPO	DIMETHYL SULFOXIDE		NCI	1845843	Other
PDGFRA	DIPHENIDOL		CKB		Other
TNFRSF11B	EPINEPHRINE		NCI	11239501	Other
PLAT	EPOETIN BETA		NCI	10682118	Other
TFPI	FULVESTRANT		NCI	17029634	Other
IL6	GALLIUM NITRATE		NCI	8788232	Other
LDLR	GLUCAGON		NCI	2552996	Other
MMP9	GLUCOSAMINE	antagonist	DrugBank	12405690|16616490|17498959|16756968|12801482	Other
LDLR	HALOPERIDOL		NCI	17052361	Other
CD40	HYDROQUINONE		NCI	17118622	Other
IL15	LEVODOPA		NCI	14514477	Other
IGFBP1	LIOTHYRONINE SODIUM		NCI	9540232	Other
MMP7	MEGLUMINE	inhibitor	GuideToPharmacologyInteractions		Other
MPO	MELATONIN	inhibitor	DrugBank	18237195	Other
SULT2A1	MERCURIC IODIDE		DrugBank	17139284|17016423	Other
IL2RA	METHIMAZOLE		NCI	7647571|1760523|8340196	Other
ADM	PAROXETINE		PharmGKB		Other
PDGFRA	PHENOBARBITAL	inhibitor	GuideToPharmacologyInteractions		Other
MERTK	PROPARACAINE		GuideToPharmacologyInteractions		Other
IL2RA	PROPYLTHIOURACIL		NCI	8340196	Other
MPO	PYRAZINAMIDE		NCI	2832129	Other
TFF2	PYROGLUTAMIC ACID		DrugBank	10592235	Other
IL10	RABEPRAZOLE		NCI	16815316	Other
PLAT	RALOXIFENE		NCI	16167916	Other
CALCA	RANITIDINE		NCI	12495560	Other
TNFRSF11B	RISEDRONIC ACID		NCI	15777635	Other
FAS	RIZATRIPTAN		GuideToPharmacologyInteractions|NCI	12660450|10974031	Other
PVALB	SODIUM CHLORIDE		NCI	9133585	Other
PLAT	TRANEXAMIC ACID		TdgClinicalTrial|TEND		Other
HSPB1	UREA		NCI	9094264	Other
FAS	VALPROIC ACID		NCI	16328060	Other
FKBP5	VENLAFAXINE		PharmGKB		Other
NPM1	VORINOSTAT		CKB	26634271	Other
HMOX1	ZINC CHLORIDE		NCI	9175711	Other
FAS	CHOLECALCIFEROL		NCI	9811059	Vitamin
MPO	TOCOPHEROL ACETATE		NCI	15150308	Vitamin
