# Supplementary material for: Robust prognostic signatures derived from proteomic panel profiling of plasma from patients with severe COVID-19 complications
Source: Research Square preprint supplement (doi:10.21203/rs.3.rs-126482/v1), 2021-03-08
Supplement: Supplementary file 6 [file 441c710d13f9cd771172b8f0.xlsx]

## Sheet: Table S3
Table S3: Differentially Expressed Proteins (DEPs) between severe, mild and control cases
UniProt ID	Ensembl ID	Symbol	DEPs list (Figure S2D)	DEPs pathways in Severe vs Mild (Figure 2)	expCTRL	expMild	expSevere	expPlot	log2(FC) S vs. C	FC S vs. C	AdjP S vs. C	log2(FC) S vs. M	FC S vs. M	AdjP S vs. M	log2(FC) M vs. C	FC M vs. C	AdjP M vs. C	MUVR (Figure 4)	Olink Panel name (version)
Q01638	ENSG00000115602	IL1RL1	shared Severe vs mild/control 226 up	Cytokine-cytokine interaction / TNF, IL17, PI3K-Akt, Rap1 and Ras, and JAK-STAT Signaling	2.46874	2.7863	6.05817		3.58824	12.0273	1.17736e-41	3.27319	9.66783	3.37469e-37	0.31756	1.24622	0.178367	Module i	Olink CARDIOVASCULAR III(v.6112)
P49747	ENSG00000105664	COMP	Shared all 22 down		5.43377	4.76834	4.12004		-1.30966	0.403417	1.52405e-16	-0.645147	0.639428	1.6957e-05	-0.664509	0.630904	8.93602e-05	Module i	Olink CARDIOMETABOLIC(v.3603)
Q9NQ79	ENSG00000095713	CRTAC1	shared vs. Control 56 down		1.51243	0.938482	0.659514		-0.852296	0.553902	3.40288e-24	-0.278969	0.82418	0.000155818	-0.573618	0.67193	2.29862e-12	Module i	Olink CARDIOMETABOLIC(v.3603)
O14763	ENSG00000120889	TNFRSF10B	Shared all 72 up		3.35531	3.87666	5.63278		2.26706	4.81342	5.39687e-25	1.74865	3.36043	4.50374e-17	0.518415	1.43238	0.0189241	Module i	Olink INFLAMMATION(v.3021)
P07711	ENSG00000135047	CTSL	Shared all 72 up		4.63626	5.54017	7.64283		2.99366	7.96494	3.42048e-34	2.09664	4.27713	2.38978e-21	0.89702	1.86222	3.72633e-05	Module i	Olink CELL REGULATION(v.3702)
P10721	ENSG00000157404	KIT	shared vs. Control 56 down		2.51611	2.07171	1.79422		-0.709064	0.611717	4.19593e-15	-0.277493	0.825024	0.00198007	-0.440975	0.736636	5.07412e-06	Module i	Olink CARDIOMETABOLIC(v.3603)
P12644	ENSG00000125378	BMP4	Shared all 22 down		3.08476	2.29669	1.70179		-1.37704	0.385008	1.18872e-22	-0.592079	0.663386	2.44271e-06	-0.784962	0.580367	1.69522e-08	Module i	Olink NEUROLOGY(v.8012)
Q8NDB2	ENSG00000153064	BANK1	shared vs. Control 56 down		5.66812	4.01411	3.80075		-1.93817	0.260946	4.78375e-06	-0.213357	0.862528	0.601001	-1.67612	0.312922	0.000605289	Module i	Olink ORGAN DAMAGE(v.3311)
Q96JA1	ENSG00000144749	LRIG1	Shared all 72 up		1.43544	2.0316	2.58224		1.13842	2.20139	6.61802e-17	0.545375	1.4594	2.14901e-05	0.593042	1.50842	3.72633e-05	Module i	Olink METABOLISM(v.3403)
Q9H4F8	ENSG00000198732	SMOC1	Shared all 72 up		3.29461	3.98475	7.08488		3.79172	13.8491	3.43443e-39	3.10422	8.59932	1.0925e-30	0.687502	1.61049	0.00533517	Module i	Olink NEURO EXPLORATORY(v.3911)
Q92692	ENSG00000130202	NECTIN2	Shared all 72 up	Cell adhesion molecules / NF-kappa B signaling	3.91109	4.26448	5.21636		1.30424	2.46954	4.5245e-15	0.950509	1.93255	4.81171e-09	0.353732	1.27786	0.0575993	Module ii	Olink METABOLISM(v.3403)
P08887	ENSG00000160712	IL6R	shared Severe vs mild/control 226 up	Cytokine-cytokine interaction / TNF, IL17, PI3K-Akt, Rap1 and Ras, and JAK-STAT Signaling	10.2117	10.2391	11.8935		1.66485	3.1708	2.81963e-21	1.64221	3.12144	3.80455e-20	0.0273504	1.01914	0.914667	Module ii	Olink CARDIOVASCULAR III(v.6112)
P14210	ENSG00000019991	HGF	shared Severe vs mild/control 226 up	Cytokine-cytokine interaction / TNF, IL17, PI3K-Akt, Rap1 and Ras, and JAK-STAT Signaling	7.40091	7.73177	9.73119		2.3185	4.98812	1.20948e-24	1.99294	3.98047	1.60265e-19	0.330863	1.25777	0.175807	Module ii	Olink IMMUNE RESPONSE(v.3204)
P15514	ENSG00000109321	AREG	shared Severe vs mild/control 226 up	Cytokine-cytokine interaction / TNF, IL17, PI3K-Akt, Rap1 and Ras, and JAK-STAT Signaling	0.825863	1.13148	3.23888		2.41433	5.3307	1.55325e-32	2.10827	4.31173	4.61029e-27	0.305615	1.23595	0.113245	Module ii	Olink CARDIOVASCULAR II(v.5004)
P16234	ENSG00000134853	PDGFRA	shared Severe vs mild/control 226 up	Cytokine-cytokine interaction / TNF, IL17, PI3K-Akt, Rap1 and Ras, and JAK-STAT Signaling	3.21445	3.13074	4.41407		1.19113	2.28332	1.44977e-18	1.27718	2.42365	9.74818e-20	-0.0837014	0.943634	0.613049	Module ii	Olink CARDIOVASCULAR III(v.6112)/Olink METABOLISM(v.3403)
P24821	ENSG00000041982	TNC	shared Severe vs mild/control 226 up	Cytokine-cytokine interaction / TNF, IL17, PI3K-Akt, Rap1 and Ras, and JAK-STAT Signaling	1.91204	2.22743	4.49731		2.60152	6.06927	4.25867e-30	2.28345	4.8684	5.07512e-25	0.31539	1.24435	0.16378	Module ii	Olink INFLAMMATION(v.3021)
P27930	ENSG00000115590	IL1R2	shared Severe vs mild/control 226 up	Cytokine-cytokine interaction / TNF, IL17, PI3K-Akt, Rap1 and Ras, and JAK-STAT Signaling	3.23164	3.07404	4.61654		1.4013	2.6414	7.28409e-25	1.55516	2.93867	1.33119e-27	-0.157597	0.896517	0.305229	Module ii	Olink CELL REGULATION(v.3702)
P40933	ENSG00000164136	IL15	shared Severe vs mild/control 226 up	Cytokine-cytokine interaction / TNF, IL17, PI3K-Akt, Rap1 and Ras, and JAK-STAT Signaling	0.499496	0.796224	1.93395		1.43465	2.70317	1.02021e-27	1.13963	2.20325	6.41666e-20	0.296729	1.22836	0.022207	Module ii	Olink CARDIOVASCULAR III(v.6112)
Q13478	ENSG00000115604	IL18R1	shared Severe vs mild/control 226 up	Cytokine-cytokine interaction / TNF, IL17, PI3K-Akt, Rap1 and Ras, and JAK-STAT Signaling	6.74881	6.99407	8.61539		1.85658	3.62149	5.99632e-27	1.61456	3.06218	8.8065e-22	0.245254	1.1853	0.176157	Module ii	Olink CARDIOVASCULAR II(v.5004)
Q86WV1	ENSG00000141293	SKAP1	shared Severe vs mild/control 40 down	Cytokine-cytokine interaction / TNF, IL17, PI3K-Akt, Rap1 and Ras, and JAK-STAT Signaling	6.0034	5.53641	3.63315		-2.39545	0.190063	2.82854e-18	-1.92224	0.263844	8.68073e-13	-0.466991	0.723472	0.119174	Module ii	Olink NEUROLOGY(v.8012)
Q9NRM6	ENSG00000056736	IL17RB	Shared all 72 up	Cytokine-cytokine interaction / TNF, IL17, PI3K-Akt, Rap1 and Ras, and JAK-STAT Signaling	3.52169	3.96913	6.1017		2.57174	5.94526	9.66677e-27	2.12815	4.37158	3.53744e-20	0.443587	1.35998	0.0656932	Module ii	Olink NEURO EXPLORATORY(v.3911)
P15151	ENSG00000073008	PVR	Shared all 72 up		6.19004	6.65172	8.03919		1.84139	3.58354	7.35718e-28	1.38274	2.60763	1.29706e-18	0.458649	1.37425	0.00438004	Module ii	Olink NEUROLOGY(v.8012)
O14793	ENSG00000138379	MSTN	Shared all 22 down		2.94893	2.24791	0.91545		-2.03079	0.244721	2.03366e-32	-1.3312	0.397437	2.36447e-18	-0.699584	0.61575	5.07412e-06	Module ii	Olink INFLAMMATION(v.3021)
O15232	ENSG00000132031	MATN3	Shared all 72 up		6.77556	7.21603	9.94837		3.17764	9.04824	1.93726e-38	2.73671	6.66546	1.12788e-31	0.440933	1.35748	0.0415199	Module ii	Olink ORGAN DAMAGE(v.3311)
O95841	ENSG00000116194	ANGPTL1	shared Severe vs mild/control 226 up		1.99956	2.21952	3.11462		1.11644	2.16811	1.07386e-23	0.896834	1.86198	5.01534e-17	0.219968	1.16471	0.0554488	Module ii	Olink METABOLISM(v.3403)
P05231	ENSG00000136244	IL6	Shared all 72 up		1.61901	2.32109	6.52976		4.8618	29.0768	2.51846e-36	4.17233	18.03	1.01124e-29	0.689472	1.61269	0.0493787	Module ii	Olink IMMUNE RESPONSE(v.3204)/Olink INFLAMMATION(v.3021)/Olink CARDIOVASCULAR II(v.5004)
P08727	ENSG00000171345	KRT19	Shared all 72 up		0.859027	1.40226	4.46779		3.62406	12.3297	2.21673e-32	3.07912	8.45101	6.50622e-26	0.544939	1.45896	0.058645	Module ii	Olink IMMUNE RESPONSE(v.3204)
P18065	ENSG00000115457	IGFBP2	Shared all 72 up		5.24272	5.66855	7.54415		2.30965	4.95763	1.87867e-22	1.88231	3.68665	2.22255e-16	0.427339	1.34475	0.0862891	Module ii	Olink ORGAN DAMAGE(v.3311)/Olink CARDIOVASCULAR II(v.5004)
P19022	ENSG00000170558	CDH2	shared Severe vs mild/control 226 up		1.17311	1.43863	2.79927		1.61758	3.0686	1.63725e-23	1.3552	2.55833	6.64214e-18	0.265517	1.20207	0.124516	Module ii	Olink CARDIOMETABOLIC(v.3603)
P21246	ENSG00000105894	PTN	Shared all 72 up		-0.30715	0.809298	4.52575		4.80356	27.9264	5.5994e-26	3.69848	12.9824	8.47509e-18	1.10507	2.1511	0.0153817	Module ii	Olink ORGAN DAMAGE(v.3311)
P21583	ENSG00000049130	KITLG	Shared all 22 down		7.61649	7.0782	5.68343		-1.92934	0.262549	2.97636e-22	-1.39451	0.380375	1.32242e-13	-0.534837	0.690237	0.00896655	Module ii	Olink NEUROLOGY(v.8012)
P24158	ENSG00000196415	PRTN3	shared Severe vs mild/control 226 up		2.23856	2.2335	3.76449		1.52	2.86792	2.15512e-17	1.5257	2.87926	6.82863e-17	-0.00506458	0.996496	0.980063	Module ii	Olink INFLAMMATION(v.3021)
P26022	ENSG00000163661	PTX3	Shared all 72 up		2.88378	3.4386	5.75193		2.85075	7.21374	7.1428e-37	2.30267	4.9337	4.10993e-28	0.548078	1.46214	0.00533517	Module ii	Olink INFLAMMATION(v.3021)
P31997	ENSG00000124469	CEACAM8	shared Severe vs mild/control 226 up		2.72363	2.21396	3.32987		0.604263	1.5202	0.00207967	1.11456	2.16528	4.9933e-08	-0.510294	0.702079	0.0299732	Module ii	Olink CARDIOVASCULAR III(v.6112)
P35318	ENSG00000148926	ADM	Shared all 72 up		3.78754	4.40372	6.29118		2.48608	5.60255	2.74781e-24	1.87407	3.66566	5.97331e-16	0.612011	1.52839	0.0138982	Module ii	Olink CARDIOVASCULAR II(v.5004)
P56159	ENSG00000151892	GFRA1	shared Severe vs mild/control 226 up		4.86784	5.05118	6.51738		1.66666	3.17479	2.85796e-22	1.47805	2.78572	2.4928e-18	0.183349	1.13552	0.328301	Module ii	Olink CARDIOMETABOLIC(v.3603)
P80098	ENSG00000108688	CCL7	Shared all 72 up		0.835842	1.61011	3.98639		3.1263	8.73195	1.33898e-28	2.36048	5.13542	2.54442e-19	0.765822	1.70034	0.00424129	Module ii	Olink CARDIOVASCULAR III(v.6112)
Q03393	ENSG00000150787	PTS	Shared all 72 up		1.9725	2.71469	5.02833		3.03509	8.19694	2.13313e-27	2.30318	4.93543	1.76167e-18	0.73191	1.66084	0.00708614	Module ii	Olink CARDIOVASCULAR II(v.5004)
Q16620	ENSG00000148053	NTRK2	Shared all 22 down		5.02195	4.58159	4.2261		-0.794591	0.576507	5.54642e-18	-0.354814	0.781971	3.49581e-05	-0.439777	0.737249	5.07412e-06	Module ii	Olink NEUROLOGY(v.8012)
Q8WTT0	ENSG00000198178	CLEC4C	shared Severe vs mild/control 40 down		2.7675	2.54958	0.875636		-1.89196	0.269441	3.4948e-16	-1.67675	0.312787	4.65245e-13	-0.217922	0.859803	0.44465	Module ii	Olink CARDIOVASCULAR III(v.6112)
Q96B86	ENSG00000182175	RGMA	shared vs. Control 56 down		9.44795	9.05242	8.81239		-0.621403	0.650038	1.03436e-08	-0.240034	0.846726	0.0406791	-0.391308	0.762438	0.00155385	Module ii	Olink NEUROLOGY(v.8012)
Q96D42	ENSG00000113249	HAVCR1	Shared all 72 up		5.11982	5.78461	7.89119		2.75847	6.76678	1.94697e-25	2.09827	4.28195	4.50374e-17	0.6602	1.5803	0.0128482	Module ii	Olink CARDIOMETABOLIC(v.3603)
Q96LC7	ENSG00000142512	SIGLEC10	shared Severe vs mild/control 226 up		2.68007	2.84123	4.15414		1.46719	2.76483	3.32854e-25	1.30905	2.47778	5.06637e-21	0.161165	1.11819	0.308236	Module ii	Olink CARDIOVASCULAR III(v.6112)
Q9BYF1	ENSG00000130234	ACE2	Shared all 72 up		1.1889	1.84898	4.27113		3.09023	8.51629	8.08235e-28	2.43111	5.39306	9.07938e-20	0.65912	1.57912	0.0172763	Module ii	Olink NEUROLOGY(v.8012)
Q9GZM7	ENSG00000142910	TINAGL1	Shared all 72 up		2.30432	2.62749	3.99594		1.69036	3.22737	4.33346e-30	1.36825	2.58157	2.38552e-22	0.32211	1.25016	0.0231508	Module ii	Olink CARDIOVASCULAR II(v.5004)
Q9Y662	ENSG00000125430	HS3ST3B1	Shared all 72 up		0.762537	1.11712	1.92809		1.16747	2.24617	6.1725e-25	0.812819	1.75664	1.16284e-14	0.354649	1.27867	0.00144854	Module ii	Olink CELL REGULATION(v.3702)
Q9Y5Y7	ENSG00000133800	LYVE1	unique Severe vs mild 33 up		4.13975	3.81443	4.2491		0.109354	1.07875	0.37477	0.439773	1.35639	0.000522256	-0.323573	0.799088	0.0274563	Module iii	Olink CARDIOMETABOLIC(v.3603)
O00182	ENSG00000168961	LGALS9	Shared all 72 up		6.95934	7.60359	8.65186		1.67172	3.18595	1.29998e-27	1.03306	2.04636	7.43795e-14	0.638662	1.55689	9.60163e-06	Module iii	Olink IMMUNE RESPONSE(v.3204)
O75077	ENSG00000114948	ADAM23	shared vs. Control 56 down		2.02515	1.54134	1.26623		-0.752143	0.593721	2.26428e-07	-0.275115	0.826384	0.0771714	-0.481	0.716481	0.00411429	Module iii	Olink NEUROLOGY(v.8012)
P02778	ENSG00000169245	CXCL10	Shared all 72 up		6.84245	8.1693	9.96875		3.09522	8.54583	1.82773e-18	1.77652	3.42598	7.92227e-08	1.3187	2.49442	0.000365777	Module iii	Olink CARDIOVASCULAR III(v.6112)
P05107	ENSG00000160255	ITGB2	shared vs. Control 56 down		4.37154	3.86989	3.80074		-0.584319	0.666964	1.39128e-05	-0.0691457	0.953202	0.620361	-0.505409	0.704461	0.00117628	Module iii	Olink CARDIOVASCULAR III(v.6112)
P07947	ENSG00000176105	YES1	shared vs. Control 56 down		3.73797	2.74478	2.99494		-0.804116	0.572713	0.0195484	0.250156	1.18934	0.61393	-1.01222	0.495782	0.0138752	Module iii	Olink ORGAN DAMAGE(v.3311)
P13500	ENSG00000108691	CCL2	shared vs. Control 16 up		9.87448	10.2922	10.4765		0.592308	1.50766	0.00351164	0.184318	1.13628	0.447534	0.413994	1.33237	0.0915278	Module iii	Olink CARDIOVASCULAR III(v.6112)/Olink INFLAMMATION(v.3021)
P26010	ENSG00000139626	ITGB7	shared vs. Control 56 down		0.215758	-0.222478	-0.385975		-0.595456	0.661835	9.83825e-12	-0.163497	0.892858	0.076521	-0.436381	0.738986	5.07412e-06	Module iii	Olink METABOLISM(v.3403)
P29017	ENSG00000158481	CD1C	Shared all 22 down		3.00033	2.50969	1.72941		-1.25395	0.419297	3.99103e-22	-0.768795	0.586907	1.3486e-10	-0.485159	0.714418	0.000213696	Module iii	Olink METABOLISM(v.3403)
Q16288	ENSG00000140538	NTRK3	unique Severe vs control 51 down		4.98161	4.68673	4.50763		-0.468479	0.722726	1.73888e-09	-0.179097	0.883256	0.0284734	-0.294883	0.815138	0.000904868	Module iii	Olink NEUROLOGY(v.8012)
Q6UB28	ENSG00000172878	METAP1D	unique Mild vs control 21 down		2.81524	2.1602	2.52161		-0.293635	0.815844	0.307982	0.361414	1.28468	0.321288	-0.664777	0.630786	0.0684619	Module iii	Olink CELL REGULATION(v.3702)
Q8IU54	ENSG00000182393	IFNL1	Shared all 72 up		0.277246	1.01575	1.85845		1.55889	2.94627	3.24379e-10	0.826949	1.77393	0.000835731	0.731943	1.66087	0.0104507	Module iii	Olink NEURO EXPLORATORY(v.3911)
Q8N5S9	ENSG00000004660	CAMKK1	shared vs. Control 56 down		0.997225	0.421998	0.276184		-0.71899	0.607522	3.09248e-10	-0.145814	0.903869	0.242895	-0.575236	0.671176	5.07412e-06	Module iii	Olink CELL REGULATION(v.3702)
Q8NHJ6	ENSG00000186818	LILRB4	Shared all 72 up		0.891456	1.44618	2.49208		1.59038	3.0113	1.41242e-21	1.03769	2.05294	2.62468e-11	0.552694	1.46682	0.00115254	Module iii	Olink NEURO EXPLORATORY(v.3911)
Q8WX77	ENSG00000137142	IGFBPL1	shared Severe vs mild/control 226 up		1.142	1.45746	1.81519		0.670979	1.59215	5.98933e-09	0.355146	1.27912	0.00227264	0.31546	1.24441	0.0188133	Module iii	Olink METABOLISM(v.3403)
Q99075	ENSG00000113070	HBEGF	shared vs. Control 16 up		3.13225	3.53252	3.73983		0.59937	1.51505	0.000165629	0.207309	1.15453	0.255416	0.397472	1.3172	0.0375506	Module iii	Olink CARDIOVASCULAR II(v.5004)
Q99727	ENSG00000157150	TIMP4	Shared all 72 up		1.26496	1.70159	2.48366		1.21963	2.32886	3.82205e-22	0.782285	1.71985	2.43485e-11	0.437342	1.35411	0.000605289	Module iii	Olink CARDIOVASCULAR III(v.6112)
Q99988	ENSG00000130513	GDF15	Shared all 72 up		3.21375	4.1723	5.8575		2.62598	6.17303	1.20948e-24	1.67209	3.18676	1.14454e-12	0.95389	1.93709	0.000159893	Module iii	Olink NEUROLOGY(v.8012)
Q9BWV1	ENSG00000144857	BOC	Shared all 22 down		3.30133	2.9002	2.46032		-0.820752	0.566147	8.5596e-14	-0.425393	0.744636	6.27097e-05	-0.395359	0.7603	0.00106955	Module iii	Olink CELL REGULATION(v.3702)/Olink CARDIOVASCULAR II(v.5004)
Q9GZY6	ENSG00000086730	LAT2	shared vs. Control 56 down		3.59013	2.82975	3.06848		-0.550219	0.682916	0.0234709	0.238728	1.17995	0.432866	-0.769831	0.586486	0.00708614	Module iii	Olink ORGAN DAMAGE(v.3311)
Q9HAN9	ENSG00000173614	NMNAT1	unique Severe vs mild 33 up		4.10938	2.85623	3.88257		-0.226811	0.854522	0.397141	1.00474	2.00658	0.000685568	-1.26418	0.416335	0.000159893	Module iii	Olink NEUROLOGY(v.8012)
Q9NPY3	ENSG00000125810	CD93	unique Mild vs control 21 down		9.11769	8.67679	8.98992		-0.127776	0.915242	0.30981	0.313129	1.2424	0.00536903	-0.437082	0.738627	0.000661141	Module iii	Olink CARDIOVASCULAR III(v.6112)
Q9NX58	ENSG00000145220	LYAR	shared vs. Control 56 down		1.4184	0.334529	0.334895		-1.11004	0.46328	1.02462e-05	0.000366566	1.00025	0.960007	-1.09245	0.468966	0.000159893	Module iii	Olink CELL REGULATION(v.3702)
Q9NZN5	ENSG00000196914	ARHGEF12	shared vs. Control 56 down		2.24726	1.14629	1.11914		-1.1876	0.439034	0.000301562	-0.027148	0.981358	0.880361	-1.11888	0.460452	0.00357881	Module iii	Olink CELL REGULATION(v.3702)
Q9UKX5	ENSG00000137809	ITGA11	Shared all 22 down		2.09634	1.36488	0.680118		-1.40862	0.376671	1.1933e-23	-0.679836	0.624236	5.80892e-08	-0.728786	0.603412	1.21276e-07	Module iii	Olink IMMUNE RESPONSE(v.3204)
Q9UMR7	ENSG00000111729	CLEC4A	Shared all 22 down		2.61194	2.03882	1.68676		-0.932028	0.524121	1.00433e-11	-0.358492	0.77998	0.00863745	-0.573537	0.671968	0.000159893	Module iii	Olink IMMUNE RESPONSE(v.3204)
Q9Y6K9	ENSG00000269335	IKBKG	shared vs. Control 56 down		3.73272	2.56073	2.57833		-1.20521	0.433705	0.000117743	0.0175939	1.01227	0.968124	-1.18817	0.438858	0.00111046	Module iii	Olink CARDIOVASCULAR II(v.5004)
P13611	ENSG00000038427	VCAN	shared Severe vs mild/control 226 up	Cell adhesion molecules / NF-kappa B signaling	1.73008	2.00204	3.07494		1.35194	2.55256	9.0973e-21	1.07921	2.11287	1.40986e-14	0.271957	1.20744	0.0785665	Module iv	Olink CELL REGULATION(v.3702)
P19438	ENSG00000067182	TNFRSF1A	shared Severe vs mild/control 226 up	Cell adhesion molecules / NF-kappa B signaling	4.71881	4.89366	5.917		1.2034	2.30281	3.36801e-12	1.02553	2.03571	3.10401e-09	0.174843	1.12884	0.409136	Module iv	Olink NEUROLOGY(v.8012)
Q9Y624	ENSG00000158769	F11R	unique Severe vs mild 33 up	Cell adhesion molecules / NF-kappa B signaling	2.81813	2.45738	3.1503		0.332173	1.25891	0.216492	0.672815	1.59418	0.00617482	-0.360745	0.778762	0.226465	Module iv	Olink CARDIOVASCULAR III(v.6112)
P07204	ENSG00000178726	THBD	shared Severe vs mild/control 226 up	Complement and coagulation cascades	7.63596	7.47315	8.42273		0.79494	1.73501	4.04085e-10	0.95589	1.93978	8.04648e-13	-0.162816	0.89328	0.314318	Module iv	Olink CARDIOVASCULAR II(v.5004)
P10646	ENSG00000003436	TFPI	shared Severe vs mild/control 226 up	Complement and coagulation cascades	7.30024	7.43594	8.41352		1.11594	2.16736	2.24871e-18	0.979283	1.97149	1.1456e-14	0.1357	1.09863	0.365012	Module iv	Olink CARDIOVASCULAR III(v.6112)
Q03405	ENSG00000011422	PLAUR	shared Severe vs mild/control 226 up	Complement and coagulation cascades	3.73127	3.89851	4.96015		1.21924	2.32824	1.84634e-13	1.05405	2.07635	1.93903e-10	0.167238	1.12291	0.420813	Module iv	Olink IMMUNE RESPONSE(v.3204)
O14788	ENSG00000120659	TNFSF11	Shared all 22 down	Cytokine-cytokine interaction / TNF, IL17, PI3K-Akt, Rap1 and Ras, and JAK-STAT Signaling	2.89421	2.56641	1.26378		-1.6238	0.32448	8.94666e-20	-1.30011	0.406096	7.33559e-14	-0.32369	0.799024	0.0914836	Module iv	Olink INFLAMMATION(v.3021)
P01374	ENSG00000173503	LTA	shared Severe vs mild/control 40 down	Cytokine-cytokine interaction / TNF, IL17, PI3K-Akt, Rap1 and Ras, and JAK-STAT Signaling	2.9282	3.03857	2.06752		-0.872581	0.546169	8.61352e-11	-0.981325	0.506514	2.27071e-12	0.110371	1.07951	0.532524	Module iv	Olink INFLAMMATION(v.3021)
P06127	ENSG00000110448	CD5	shared Severe vs mild/control 40 down	Cytokine-cytokine interaction / TNF, IL17, PI3K-Akt, Rap1 and Ras, and JAK-STAT Signaling	4.65449	4.60519	3.62181		-1.05427	0.481541	5.73178e-11	-1.00126	0.499563	8.6151e-10	-0.0493008	0.966405	0.820218	Module iv	Olink INFLAMMATION(v.3021)
P09919	ENSG00000108342	CSF3	shared Severe vs mild/control 226 up	Cytokine-cytokine interaction / TNF, IL17, PI3K-Akt, Rap1 and Ras, and JAK-STAT Signaling	0.775898	1.07574	2.05252		1.27077	2.4129	6.39618e-14	0.971433	1.96079	5.92176e-09	0.299844	1.23101	0.125569	Module iv	Olink NEUROLOGY(v.8012)
P24394	ENSG00000077238	IL4R	shared Severe vs mild/control 226 up	Cytokine-cytokine interaction / TNF, IL17, PI3K-Akt, Rap1 and Ras, and JAK-STAT Signaling	0.391858	0.519344	1.30146		0.9128	1.8827	4.5245e-15	0.785129	1.72325	1.30607e-11	0.127486	1.09239	0.366156	Module iv	Olink CARDIOVASCULAR II(v.5004)
P29459	ENSG00000168811	IL12A	shared Severe vs mild/control 40 down	Cytokine-cytokine interaction / TNF, IL17, PI3K-Akt, Rap1 and Ras, and JAK-STAT Signaling	6.1577	6.40143	4.9646		-1.20055	0.43511	7.61835e-08	-1.44503	0.367283	4.97823e-10	0.243737	1.18406	0.39472	Module iv	Olink INFLAMMATION(v.3021)/Olink CARDIOVASCULAR II(v.5004)
P29460	ENSG00000113302	IL12B	shared Severe vs mild/control 40 down	Cytokine-cytokine interaction / TNF, IL17, PI3K-Akt, Rap1 and Ras, and JAK-STAT Signaling	4.02889	4.3088	2.8485		-1.19929	0.435488	9.56387e-08	-1.47689	0.359263	2.93617e-10	0.279912	1.21412	0.332836	Module iv	Olink INFLAMMATION(v.3021)
P48357	ENSG00000116678	LEPR	shared Severe vs mild/control 226 up	Cytokine-cytokine interaction / TNF, IL17, PI3K-Akt, Rap1 and Ras, and JAK-STAT Signaling	2.60387	2.75893	3.52666		0.931798	1.90765	1.25372e-16	0.775708	1.71203	3.04389e-12	0.155052	1.11346	0.237097	Module iv	Olink NEURO EXPLORATORY(v.3911)
P49771	ENSG00000090554	FLT3LG	shared Severe vs mild/control 40 down	Cytokine-cytokine interaction / TNF, IL17, PI3K-Akt, Rap1 and Ras, and JAK-STAT Signaling	6.99571	6.99564	5.60594		-1.41054	0.376171	5.66875e-14	-1.40556	0.377473	2.20946e-13	-6.80556e-05	0.999953	0.982769	Module iv	Olink NEUROLOGY(v.8012)
P50591	ENSG00000121858	TNFSF10	shared Severe vs mild/control 40 down	Cytokine-cytokine interaction / TNF, IL17, PI3K-Akt, Rap1 and Ras, and JAK-STAT Signaling	6.42641	6.45144	5.86459		-0.569347	0.673922	6.01144e-06	-0.593272	0.662838	4.07931e-06	0.0250232	1.0175	0.899723	Module iv	Olink INFLAMMATION(v.3021)
P51671	ENSG00000172156	CCL11	shared Severe vs mild/control 40 down	Cytokine-cytokine interaction / TNF, IL17, PI3K-Akt, Rap1 and Ras, and JAK-STAT Signaling	5.57836	5.53586	5.20948		-0.371692	0.772876	0.00385661	-0.328029	0.796624	0.0149467	-0.0425026	0.970969	0.821521	Module iv	Olink IMMUNE RESPONSE(v.3204)/Olink INFLAMMATION(v.3021)
Q9H2A7	ENSG00000161921	CXCL16	shared Severe vs mild/control 226 up	Cytokine-cytokine interaction / TNF, IL17, PI3K-Akt, Rap1 and Ras, and JAK-STAT Signaling	4.5811	4.63836	5.9733		1.41614	2.66871	1.19127e-05	1.35159	2.55192	4.34332e-05	0.0572621	1.04049	0.896537	Module iv	Olink CARDIOVASCULAR II(v.5004)
Q9NP84	ENSG00000006327	TNFRSF12A	shared Severe vs mild/control 226 up	Cytokine-cytokine interaction / TNF, IL17, PI3K-Akt, Rap1 and Ras, and JAK-STAT Signaling	1.95188	2.00971	3.55103		1.60507	3.0421	1.00496e-12	1.54512	2.91829	1.39e-11	0.0578256	1.0409	0.844815	Module iv	Olink NEUROLOGY(v.8012)
P17936	ENSG00000146674	IGFBP3	shared Severe vs mild/control 40 down		2.00955	1.95759	1.3196		-0.682948	0.622891	6.05086e-08	-0.634344	0.644234	7.75273e-07	-0.0519608	0.964624	0.796737	Module iv	Olink CARDIOMETABOLIC(v.3603)
A6NI73	ENSG00000187116	LILRA5	shared Severe vs mild/control 226 up		2.48276	2.79954	3.56546		1.08355	2.11924	3.02245e-17	0.766713	1.70139	5.52147e-10	0.316779	1.24555	0.0231508	Module iv	Olink METABOLISM(v.3403)
NTPROBNP	NTPROBNP	NT-proBNP	shared Severe vs mild/control 226 up		0.993342	1.27804	2.92933		1.93719	3.82958	5.10256e-10	1.64966	3.13759	1.41504e-07	0.284701	1.21816	0.471685	Module iv	Olink NEUROLOGY(v.8012)
O00221	ENSG00000146232	NFKBIE	unique Severe vs control 51 down		1.62467	1.33731	1.10655		-0.534913	0.6902	0.000839926	-0.230766	0.852183	0.167044	-0.287358	0.819401	0.140848	Module iv	Olink CELL REGULATION(v.3702)
O43699	ENSG00000105492	SIGLEC6	shared Severe vs mild/control 40 down		5.07794	5.18243	4.66278		-0.417028	0.748966	0.000436747	-0.521751	0.696526	1.96589e-05	0.104487	1.07511	0.510228	Module iv	Olink CELL REGULATION(v.3702)
O60243	ENSG00000136720	HS6ST1	shared Severe vs mild/control 226 up		2.51998	2.80469	3.6921		1.18956	2.28082	4.5484e-19	0.901116	1.86751	2.58217e-12	0.284714	1.21817	0.0446027	Module iv	Olink CELL REGULATION(v.3702)
P01130	ENSG00000130164	LDLR	shared Severe vs mild/control 226 up		2.05481	2.24061	3.55402		1.49454	2.81775	5.63564e-19	1.31225	2.48329	3.4332e-15	0.185794	1.13744	0.351967	Module iv	Olink CARDIOVASCULAR III(v.6112)
P01222	ENSG00000134200	TSHB	shared Severe vs mild/control 40 down		2.08124	1.90301	0.90472		-1.17873	0.441741	2.64726e-08	-0.99997	0.50001	3.21651e-06	-0.178226	0.883789	0.524867	Module iv	Olink METABOLISM(v.3403)
P01258	ENSG00000110680	CALCA	shared Severe vs mild/control 226 up		2.51436	2.70752	5.65983		3.17956	9.06029	9.04956e-15	2.97689	7.87285	7.10267e-13	0.193166	1.14327	0.728186	Module iv	Olink NEURO EXPLORATORY(v.3911)
P02144	ENSG00000198125	MB	shared Severe vs mild/control 226 up		4.84955	5.13666	7.58797		2.72962	6.63282	1.40016e-18	2.44442	5.44306	2.81012e-15	0.287106	1.22019	0.438317	Module iv	Olink NEUROLOGY(v.8012)
P05164	ENSG00000005381	MPO	shared Severe vs mild/control 226 up		2.42679	2.58326	3.68829		1.25266	2.3828	3.40073e-15	1.09905	2.14213	4.61183e-12	0.15647	1.11456	0.427934	Module iv	Olink CARDIOVASCULAR II(v.5004)
P05451	ENSG00000115386	REG1A	shared Severe vs mild/control 226 up		4.5778	4.66571	6.35344		1.77857	3.43086	1.50166e-11	1.68755	3.2211	2.83224e-10	0.0879046	1.06283	0.809671	Module iv	Olink CELL REGULATION(v.3702)
P06850	ENSG00000147571	CRH	shared Severe vs mild/control 40 down		0.95145	0.919627	0.167111		-0.772172	0.585535	1.47926e-07	-0.744598	0.596834	6.76036e-07	-0.0318233	0.978183	0.899807	Module iv	Olink ORGAN DAMAGE(v.3311)
P07306	ENSG00000141505	ASGR1	Shared all 72 up		2.26902	2.60991	3.79958		1.52511	2.87809	2.17735e-20	1.18569	2.27473	9.6686e-14	0.33942	1.26525	0.0525827	Module iv	Olink CARDIOVASCULAR II(v.5004)
P07478	ENSG00000275896	PRSS2	shared Severe vs mild/control 226 up		1.36889	1.64341	3.40257		2.03915	4.11003	3.54775e-18	1.76335	3.39487	3.49813e-14	0.274517	1.20959	0.314318	Module iv	Olink CARDIOVASCULAR III(v.6112)
P07585	ENSG00000011465	DCN	shared Severe vs mild/control 226 up		2.43708	2.56303	3.45221		1.01723	2.02403	5.91457e-15	0.890402	1.85369	7.87779e-12	0.125952	1.09123	0.426183	Module iv	Olink CARDIOVASCULAR II(v.5004)
P08473	ENSG00000196549	MME	shared Severe vs mild/control 226 up		1.23387	1.38034	3.127		1.8981	3.72722	8.61379e-16	1.7509	3.36569	1.63875e-13	0.146472	1.10686	0.633204	Module iv	Olink CARDIOVASCULAR III(v.6112)
P10451	ENSG00000118785	SPP1	Shared all 72 up		4.7758	5.25736	6.89339		2.12089	4.34963	1.53852e-22	1.63772	3.11173	3.4332e-15	0.483175	1.39782	0.0322251	Module iv	Olink NEURO EXPLORATORY(v.3911)
P12544	ENSG00000145649	GZMA	shared Severe vs mild/control 40 down		4.67567	4.69891	4.21023		-0.495806	0.709165	0.000782723	-0.511005	0.701733	0.000807236	0.0232446	1.01624	0.942756	Module iv	Olink NEUROLOGY(v.8012)
P20023	ENSG00000117322	CR2	Shared all 22 down		5.59441	4.97676	3.9928		-1.56934	0.336962	1.15006e-20	-0.96419	0.512566	7.72544e-10	-0.605154	0.657401	0.000464371	Module iv	Olink CARDIOMETABOLIC(v.3603)
P25815	ENSG00000163993	S100P	shared Severe vs mild/control 40 down		1.48362	1.06136	0.60427		-0.87409	0.545598	0.00026488	-0.452653	0.730698	0.0774338	-0.422259	0.746255	0.15826	Module iv	Olink METABOLISM(v.3403)
P30203	ENSG00000013725	CD6	shared Severe vs mild/control 40 down		3.73409	3.50228	2.65253		-1.09828	0.467072	3.41834e-12	-0.863734	0.549528	3.61793e-08	-0.231808	0.851567	0.224385	Module iv	Olink INFLAMMATION(v.3021)
P30533	ENSG00000163956	LRPAP1	shared Severe vs mild/control 226 up		6.04417	5.9309	7.05629		0.997302	1.99626	2.01875e-10	1.11532	2.16643	7.14766e-12	-0.113264	0.924494	0.56832	Module iv	Olink IMMUNE RESPONSE(v.3204)
P40818	ENSG00000138592	USP8	Shared all 22 down		0.699735	0.363042	-0.252152		-0.957605	0.514911	1.42609e-13	-0.619717	0.650799	9.15537e-07	-0.337889	0.791198	0.019913	Module iv	Olink METABOLISM(v.3403)
P50749	ENSG00000101265	RASSF2	shared Severe vs mild/control 40 down		1.72991	1.28831	0.662		-1.0777	0.473782	0.000268726	-0.632616	0.645006	0.0432213	-0.441597	0.736319	0.239325	Module iv	Olink ORGAN DAMAGE(v.3311)
P52823	ENSG00000159167	STC1	Shared all 72 up		4.23209	4.62028	5.76473		1.52203	2.87195	9.24452e-19	1.13825	2.20114	7.13188e-12	0.38378	1.30476	0.039483	Module iv	Olink METABOLISM(v.3403)
P54760	ENSG00000196411	EPHB4	shared Severe vs mild/control 226 up		3.42484	3.51712	4.36234		0.94093	1.91977	2.07225e-15	0.847596	1.7995	9.99056e-13	0.0922783	1.06605	0.529548	Module iv	Olink CARDIOVASCULAR III(v.6112)
P58294	ENSG00000143125	PROK1	shared Severe vs mild/control 226 up		2.2255	2.4959	4.27574		2.05076	4.14325	6.93835e-24	1.78272	3.44075	3.48434e-19	0.270398	1.20614	0.229152	Module iv	Olink METABOLISM(v.3403)
P61244	ENSG00000125952	MAX	unique Severe vs control 51 down		-0.0449688	-0.263262	-0.395427		-0.369359	0.774126	0.00306939	-0.132165	0.912461	0.299681	-0.218293	0.859582	0.149361	Module iv	Olink ORGAN DAMAGE(v.3311)
P80511	ENSG00000163221	S100A12	shared Severe vs mild/control 226 up		2.10446	2.28586	4.67041		2.55066	5.85902	2.502e-17	2.37516	5.18794	4.68692e-15	0.181395	1.13398	0.657967	Module iv	Olink METABOLISM(v.3403)
P98073	ENSG00000154646	TMPRSS15	unique Severe vs mild 33 up		0.68159	0.589018	1.02626		0.344667	1.26986	0.128518	0.442969	1.3594	0.0673199	-0.0925718	0.937849	0.7957	Module iv	Olink ORGAN DAMAGE(v.3311)
Q07065	ENSG00000136026	CKAP4	shared Severe vs mild/control 226 up		3.1649	3.12632	4.55345		1.38084	2.60421	9.54874e-12	1.42157	2.67877	8.06603e-12	-0.0385797	0.973613	0.890078	Module iv	Olink IMMUNE RESPONSE(v.3204)
Q10589	ENSG00000130303	BST2	Shared all 72 up		4.06429	4.47162	5.8885		1.82268	3.53738	1.663e-20	1.41676	2.66986	8.26381e-14	0.405918	1.32493	0.051395	Module iv	Olink NEUROLOGY(v.8012)
Q13867	ENSG00000108578	BLMH	shared Severe vs mild/control 226 up		0.966115	1.19448	2.04916		1.06809	2.09666	1.75938e-21	0.845512	1.7969	6.14852e-15	0.22837	1.17151	0.0595132	Module iv	Olink CARDIOVASCULAR III(v.6112)
Q16651	ENSG00000052344	PRSS8	shared Severe vs mild/control 226 up		6.93003	7.08947	8.1838		1.25293	2.38325	4.74973e-17	1.0936	2.13406	1.75996e-13	0.159438	1.11685	0.369451	Module iv	Olink CARDIOVASCULAR III(v.6112)
Q2MKA7	ENSG00000169218	RSPO1	shared Severe vs mild/control 226 up		0.430796	0.734296	1.90429		1.47105	2.77225	4.7996e-16	1.16866	2.24803	5.11311e-11	0.3035	1.23413	0.144309	Module iv	Olink CARDIOVASCULAR III(v.6112)
Q6UXK5	ENSG00000175928	LRRN1	Shared all 22 down		3.25803	2.71028	2.01953		-1.22363	0.428204	2.71661e-18	-0.680767	0.623834	2.16204e-07	-0.542862	0.686408	0.000214569	Module iv	Olink CELL REGULATION(v.3702)
Q86SJ6	ENSG00000175065	DSG4	Shared all 22 down		1.26211	0.869116	0.133464		-1.09668	0.467591	1.29542e-14	-0.713797	0.609713	2.16642e-07	-0.382885	0.766903	0.0161032	Module iv	Olink ORGAN DAMAGE(v.3311)
Q86Z14	ENSG00000134962	KLB	Shared all 72 up		1.92831	2.28008	2.88239		0.946065	1.92661	9.04755e-14	0.596143	1.51167	1.37336e-06	0.349921	1.27449	0.0139354	Module iv	Olink NEURO EXPLORATORY(v.3911)
Q8IUK5	ENSG00000161381	PLXDC1	Shared all 22 down		1.54933	1.15783	0.801491		-0.752091	0.593742	5.28966e-14	-0.359304	0.779541	0.000195488	-0.392787	0.761657	0.000309986	Module iv	Olink ORGAN DAMAGE(v.3311)
Q8NFT8	ENSG00000187957	DNER	shared vs. Control 56 down		7.6905	7.35535	7.03216		-0.656644	0.634352	5.84362e-10	-0.323194	0.799298	0.00246314	-0.335132	0.792712	0.00542227	Module iv	Olink INFLAMMATION(v.3021)
Q92765	ENSG00000162998	FRZB	shared Severe vs mild/control 226 up		2.77266	3.05335	4.6394		1.86278	3.63708	1.16929e-19	1.58401	2.99803	4.68485e-15	0.280684	1.21477	0.235069	Module iv	Olink CARDIOVASCULAR III(v.6112)
Q96GW7	ENSG00000132692	BCAN	unique Severe vs control 51 down		2.41751	2.24933	1.98705		-0.419805	0.747526	9.16773e-05	-0.262274	0.833772	0.0239946	-0.168184	0.889962	0.227034	Module iv	Olink NEUROLOGY(v.8012)
Q96PD2	ENSG00000057019	DCBLD2	shared Severe vs mild/control 226 up		3.35115	3.37907	4.1909		0.836644	1.78589	1.01019e-11	0.809317	1.75238	9.42237e-11	0.0279213	1.01954	0.871399	Module iv	Olink CELL REGULATION(v.3702)/Olink IMMUNE RESPONSE(v.3204)
Q9C0C4	ENSG00000168758	SEMA4C	shared Severe vs mild/control 226 up		1.29187	1.30719	1.93386		0.640896	1.5593	9.04956e-15	0.626852	1.54419	9.62397e-14	0.0153225	1.01068	0.900563	Module iv	Olink CELL REGULATION(v.3702)
Q9HD89	ENSG00000104918	RETN	shared Severe vs mild/control 226 up		4.21604	4.28577	5.45185		1.24151	2.36445	1.30307e-13	1.17004	2.25017	5.3831e-12	0.0697274	1.04952	0.765724	Module iv	Olink METABOLISM(v.3403)
Q9NY25	ENSG00000258227	CLEC5A	shared Severe vs mild/control 226 up		2.92545	2.85088	3.89706		0.967802	1.95586	8.54558e-10	1.04369	2.06149	1.35924e-10	-0.0745658	0.949628	0.74362	Module iv	Olink INFLAMMATION(v.3021)
Q9UJ72	ENSG00000109511	ANXA10	shared Severe vs mild/control 226 up		0.650215	0.603769	2.03273		1.38682	2.61502	6.39496e-09	1.434	2.70195	4.81171e-09	-0.0464457	0.968319	0.896472	Module iv	Olink NEURO EXPLORATORY(v.3911)
Q9UN19	ENSG00000070190	DAPP1	Shared all 22 down		1.63661	0.8004	0.309116		-1.37415	0.385779	3.85547e-06	-0.52387	0.695504	0.0997471	-0.850285	0.554675	0.0161032	Module iv	Olink IMMUNE RESPONSE(v.3204)
Q9Y3P8	ENSG00000137078	SIT1	shared Severe vs mild/control 40 down		2.7156	2.55448	1.46548		-1.26239	0.416852	8.22721e-14	-1.09896	0.466852	8.01474e-11	-0.161126	0.894327	0.434502	Module iv	Olink IMMUNE RESPONSE(v.3204)
P19320	ENSG00000162692	VCAM1	shared Severe vs mild/control 226 up	Cell adhesion molecules / NF-kappa B signaling	2.56197	2.68218	3.41154		0.844718	1.79591	1.90123e-12	0.725846	1.65387	1.49683e-09	0.120209	1.08689	0.427167		Olink CARDIOMETABOLIC(v.3603)
P05362	ENSG00000090339	ICAM1	shared Severe vs mild/control 226 up	Cell adhesion molecules / NF-kappa B signaling	4.617	4.59794	5.14355		0.530549	1.44448	1.63644e-07	0.548828	1.4629	1.21452e-07	-0.0190642	0.986873	0.900563		Olink CARDIOMETABOLIC(v.3603)
P13598	ENSG00000108622	ICAM2	shared Severe vs mild/control 226 up	Cell adhesion molecules / NF-kappa B signaling	3.4859	3.75414	4.24259		0.756308	1.68916	8.04437e-11	0.489033	1.4035	2.26145e-05	0.268238	1.20434	0.0480715		Olink CARDIOVASCULAR III(v.6112)
P14778	ENSG00000115594	IL1R1	shared Severe vs mild/control 226 up	Cell adhesion molecules / NF-kappa B signaling	4.23994	4.27685	4.8561		0.629651	1.54719	1.84968e-09	0.588713	1.5039	3.16819e-08	0.0369158	1.02592	0.7942		Olink CARDIOVASCULAR III(v.6112)
P16109	ENSG00000174175	SELP	unique Severe vs mild 33 up	Cell adhesion molecules / NF-kappa B signaling	8.01595	7.7271	8.20156		0.185609	1.1373	0.361499	0.461286	1.37677	0.00943784	-0.288854	0.818552	0.165152		Olink CARDIOVASCULAR III(v.6112)
P16581	ENSG00000007908	SELE	unique Severe vs mild 33 up	Cell adhesion molecules / NF-kappa B signaling	10.5202	10.2047	10.5694		0.0492244	1.03471	0.734832	0.366326	1.28907	0.00773628	-0.315525	0.803559	0.0478243		Olink CARDIOVASCULAR III(v.6112)
P22223	ENSG00000062038	CDH3	unique Severe vs mild 33 up	Cell adhesion molecules / NF-kappa B signaling	4.88893	4.80674	5.15907		0.27015	1.20593	0.0970668	0.361722	1.28496	0.0426754	-0.082185	0.944626	0.765724		Olink NEUROLOGY(v.8012)
P25942	ENSG00000101017	CD40	shared Severe vs mild/control 226 up	Cell adhesion molecules / NF-kappa B signaling	9.56339	9.48414	10.2612		0.673376	1.5948	0.000616655	0.757763	1.69087	0.000181948	-0.0792497	0.94655	0.777163		Olink INFLAMMATION(v.3021)
P36941	ENSG00000111321	LTBR	shared Severe vs mild/control 226 up	Cell adhesion molecules / NF-kappa B signaling	1.86167	1.90057	2.58924		0.735281	1.66472	4.94855e-08	0.692828	1.61645	4.50692e-07	0.0388961	1.02733	0.830681		Olink CARDIOVASCULAR III(v.6112)
Q07954	ENSG00000123384	LRP1	shared Severe vs mild/control 226 up	Cell adhesion molecules / NF-kappa B signaling	0.61336	0.555967	1.2471		0.621844	1.53884	3.76396e-08	0.683034	1.60551	4.68089e-09	-0.0573938	0.960999	0.717599		Olink ORGAN DAMAGE(v.3311)
Q13740	ENSG00000170017	ALCAM	unique Severe vs mild 33 up	Cell adhesion molecules / NF-kappa B signaling	5.27465	5.16971	5.53569		0.261039	1.19834	0.000481103	0.372545	1.29463	3.33619e-06	-0.104941	0.929843	0.313653		Olink CARDIOVASCULAR III(v.6112)
Q9HAV5	ENSG00000131080	EDA2R	shared Severe vs mild/control 226 up	Cell adhesion molecules / NF-kappa B signaling	2.40312	2.7121	3.33504		0.924984	1.89866	9.13394e-06	0.615659	1.53226	0.00406915	0.308977	1.23883	0.242776		Olink NEUROLOGY(v.8012)
Q9Y6Q6	ENSG00000141655	TNFRSF11A	shared Severe vs mild/control 226 up	Cell adhesion molecules / NF-kappa B signaling	3.61356	3.92519	4.89674		1.27994	2.42828	2.18589e-11	0.967374	1.95528	3.56669e-07	0.311635	1.24111	0.174327		Olink CARDIOVASCULAR II(v.5004)
P03951	ENSG00000088926	F11	shared Severe vs mild/control 226 up	Complement and coagulation cascades	5.01361	5.25122	5.63647		0.609264	1.52548	4.87836e-08	0.375876	1.29763	0.000897571	0.237616	1.17904	0.0804574		Olink CARDIOMETABOLIC(v.3603)
P00749	ENSG00000122861	PLAU	unique Severe vs mild 33 up	Complement and coagulation cascades	5.70805	5.61728	5.94786		0.239818	1.18084	0.0178511	0.331306	1.25815	0.00155213	-0.0907681	0.939023	0.502676		Olink CARDIOVASCULAR III(v.6112)/Olink INFLAMMATION(v.3021)
P00750	ENSG00000104368	PLAT	Shared all 72 up	Complement and coagulation cascades	4.10142	4.48031	5.47888		1.34699	2.5438	1.02803e-12	0.978807	1.97084	1.41504e-07	0.368181	1.29072	0.0903863		Olink CARDIOVASCULAR III(v.6112)
P04070	ENSG00000115718	PROC	shared Severe vs mild/control 226 up	Complement and coagulation cascades	2.17947	2.26547	2.65815		0.483399	1.39803	3.66771e-06	0.395624	1.31551	0.000201432	0.0860022	1.06142	0.529548		Olink CARDIOMETABOLIC(v.3603)
P13726	ENSG00000117525	F3	shared Severe vs mild/control 226 up	Complement and coagulation cascades	3.28611	3.32713	4.10968		0.828854	1.77627	1.37194e-12	0.787271	1.72581	3.10397e-11	0.0410226	1.02884	0.80129		Olink CARDIOVASCULAR II(v.5004)
P25116	ENSG00000181104	F2R	shared Severe vs mild/control 226 up	Complement and coagulation cascades	6.00502	5.96197	6.58067		0.568788	1.48328	8.91469e-05	0.612891	1.52932	3.79289e-05	-0.0430454	0.970604	0.836609		Olink CARDIOVASCULAR II(v.5004)
O00300	ENSG00000164761	TNFRSF11B	shared Severe vs mild/control 226 up	Cytokine-cytokine interaction / TNF, IL17, PI3K-Akt, Rap1 and Ras, and JAK-STAT Signaling	8.20291	8.4869	9.31683		1.11327	2.16335	2.29554e-17	0.83019	1.77792	6.9035e-11	0.28399	1.21756	0.049757		Olink CARDIOVASCULAR III(v.6112)/Olink INFLAMMATION(v.3021)
O14798	ENSG00000173535	TNFRSF10C	unique Severe vs mild 33 up	Cytokine-cytokine interaction / TNF, IL17, PI3K-Akt, Rap1 and Ras, and JAK-STAT Signaling	4.76822	4.57942	4.96001		0.191786	1.14218	0.154562	0.378307	1.29982	0.00452327	-0.188805	0.877332	0.249478		Olink CARDIOVASCULAR III(v.6112)
O14836	ENSG00000240505	TNFRSF13B	shared Severe vs mild/control 226 up	Cytokine-cytokine interaction / TNF, IL17, PI3K-Akt, Rap1 and Ras, and JAK-STAT Signaling	6.68508	6.88054	7.38766		0.700476	1.62504	7.76394e-06	0.50357	1.41772	0.0016896	0.195457	1.14509	0.328301		Olink CARDIOVASCULAR II(v.5004)
O15123	ENSG00000091879	ANGPT2	shared Severe vs mild/control 226 up	Cytokine-cytokine interaction / TNF, IL17, PI3K-Akt, Rap1 and Ras, and JAK-STAT Signaling	1.24431	1.474	1.9324		0.694885	1.61876	1.34581e-08	0.462587	1.37801	0.000174351	0.229683	1.17258	0.110903		Olink METABOLISM(v.3403)
O43508	ENSG00000239697	TNFSF12	shared Severe vs mild/control 40 down	Cytokine-cytokine interaction / TNF, IL17, PI3K-Akt, Rap1 and Ras, and JAK-STAT Signaling	7.78247	7.6122	7.196		-0.589588	0.664533	2.88185e-06	-0.418642	0.748129	0.00113819	-0.170273	0.888675	0.288907		Olink INFLAMMATION(v.3021)
O43915	ENSG00000165197	VEGFD	unique Severe vs mild 10 down	Cytokine-cytokine interaction / TNF, IL17, PI3K-Akt, Rap1 and Ras, and JAK-STAT Signaling	6.63603	6.87231	6.41403		-0.222006	0.857372	0.0970668	-0.459213	0.727383	0.000808845	0.236273	1.17795	0.1579		Olink CARDIOVASCULAR II(v.5004)/Olink CELL REGULATION(v.3702)
O75015	ENSG00000162747	FCGR3B	unique Severe vs mild 33 up	Cytokine-cytokine interaction / TNF, IL17, PI3K-Akt, Rap1 and Ras, and JAK-STAT Signaling	1.96555	1.82227	2.16675		0.2012	1.14965	0.111647	0.341502	1.26708	0.00701122	-0.143277	0.90546	0.366156		Olink CARDIOMETABOLIC(v.3603)
O95750	ENSG00000162344	FGF19	shared Severe vs mild/control 40 down	Cytokine-cytokine interaction / TNF, IL17, PI3K-Akt, Rap1 and Ras, and JAK-STAT Signaling	5.84442	5.53679	4.65147		-1.18215	0.440694	1.85988e-06	-0.878351	0.543989	0.000511389	-0.307632	0.807967	0.339759		Olink INFLAMMATION(v.3021)
P01135	ENSG00000163235	TGFA	shared Severe vs mild/control 226 up	Cytokine-cytokine interaction / TNF, IL17, PI3K-Akt, Rap1 and Ras, and JAK-STAT Signaling	2.39108	2.30267	2.89301		0.511197	1.42523	0.00300088	0.596198	1.51173	0.000808845	-0.0884122	0.940557	0.743997		Olink INFLAMMATION(v.3021)
P01242	ENSG00000136487	GH2	unique Mild vs control 5 up	Cytokine-cytokine interaction / TNF, IL17, PI3K-Akt, Rap1 and Ras, and JAK-STAT Signaling	0.728062	1.06139	0.633986		-0.0940761	0.936872	0.605683	-0.427715	0.743438	0.0118498	0.335931	1.26219	0.0886695		Olink CELL REGULATION(v.3702)
P02462	ENSG00000187498	COL4A1	shared Severe vs mild/control 226 up	Cytokine-cytokine interaction / TNF, IL17, PI3K-Akt, Rap1 and Ras, and JAK-STAT Signaling	3.52243	3.78491	4.24635		0.730508	1.65922	2.18373e-05	0.466229	1.38149	0.00894596	0.262486	1.19954	0.228688		Olink CELL REGULATION(v.3702)
P05113	ENSG00000113525	IL5	unique Severe vs mild 10 down	Cytokine-cytokine interaction / TNF, IL17, PI3K-Akt, Rap1 and Ras, and JAK-STAT Signaling	-0.264806	-0.0207933	-0.36728		-0.102473	0.931435	0.482753	-0.359391	0.779494	0.0318861	0.244013	1.18428	0.238294		Olink IMMUNE RESPONSE(v.3204)/Olink INFLAMMATION(v.3021)
P08254	ENSG00000149968	MMP3	shared Severe vs mild/control 226 up	Cytokine-cytokine interaction / TNF, IL17, PI3K-Akt, Rap1 and Ras, and JAK-STAT Signaling	5.46123	5.29476	6.87708		1.42724	2.68932	1.37338e-09	1.59208	3.01483	6.83648e-11	-0.166465	0.891023	0.603576		Olink CARDIOVASCULAR III(v.6112)
P08581	ENSG00000105976	MET	shared Severe vs mild/control 226 up	Cytokine-cytokine interaction / TNF, IL17, PI3K-Akt, Rap1 and Ras, and JAK-STAT Signaling	0.68115	0.778376	1.14162		0.46468	1.38001	2.6158e-11	0.366978	1.28965	1.28925e-07	0.0972256	1.06971	0.255655		Olink CARDIOMETABOLIC(v.3603)
P10147	ENSG00000274221	CCL3	Shared all 72 up	Cytokine-cytokine interaction / TNF, IL17, PI3K-Akt, Rap1 and Ras, and JAK-STAT Signaling	3.51464	3.98446	4.48292		0.943098	1.92265	9.03841e-06	0.480499	1.39523	0.0307545	0.462599	1.37802	0.0695654		Olink CARDIOVASCULAR II(v.5004)/Olink INFLAMMATION(v.3021)
P12318	ENSG00000143226	FCGR2A	unique Severe vs mild 33 up	Cytokine-cytokine interaction / TNF, IL17, PI3K-Akt, Rap1 and Ras, and JAK-STAT Signaling	1.67793	1.52243	1.91971		0.241776	1.18245	0.0753332	0.399326	1.31889	0.00431081	-0.155505	0.897818	0.378974		Olink CARDIOMETABOLIC(v.3603)
P13232	ENSG00000104432	IL7	shared Severe vs mild/control 226 up	Cytokine-cytokine interaction / TNF, IL17, PI3K-Akt, Rap1 and Ras, and JAK-STAT Signaling	1.14362	1.24645	1.60305		0.443593	1.35999	0.00131087	0.346293	1.27129	0.0167202	0.102834	1.07388	0.613147		Olink INFLAMMATION(v.3021)
P13725	ENSG00000099985	OSM	shared Severe vs mild/control 226 up	Cytokine-cytokine interaction / TNF, IL17, PI3K-Akt, Rap1 and Ras, and JAK-STAT Signaling	3.80778	3.61299	5.03383		1.23162	2.3483	1.94243e-08	1.42643	2.6878	3.4895e-10	-0.194794	0.873697	0.493884		Olink INFLAMMATION(v.3021)
P14780	ENSG00000100985	MMP9	shared Severe vs mild/control 226 up	Cytokine-cytokine interaction / TNF, IL17, PI3K-Akt, Rap1 and Ras, and JAK-STAT Signaling	4.32278	4.12558	5.18682		0.877727	1.83748	0.000233704	1.07329	2.10423	1.24661e-05	-0.197208	0.872237	0.541937		Olink CARDIOVASCULAR III(v.6112)
P15144	ENSG00000166825	ANPEP	shared Severe vs mild/control 226 up	Cytokine-cytokine interaction / TNF, IL17, PI3K-Akt, Rap1 and Ras, and JAK-STAT Signaling	3.12193	3.05632	3.53856		0.421686	1.33949	8.78787e-05	0.485291	1.39987	1.09612e-05	-0.0656157	0.955537	0.690142		Olink CARDIOVASCULAR III(v.6112)
P18564	ENSG00000115221	ITGB6	unique Severe vs mild 33 up	Cytokine-cytokine interaction / TNF, IL17, PI3K-Akt, Rap1 and Ras, and JAK-STAT Signaling	0.789283	0.632322	1.0369		0.247619	1.18725	0.0154302	0.415182	1.33347	0.000197676	-0.156961	0.896912	0.278971		Olink IMMUNE RESPONSE(v.3204)
P19878	ENSG00000116701	NCF2	shared Severe vs mild/control 40 down	Cytokine-cytokine interaction / TNF, IL17, PI3K-Akt, Rap1 and Ras, and JAK-STAT Signaling	6.76949	5.738	4.01753		-2.74536	0.14913	2.4897e-06	-1.71375	0.304867	0.00415284	-1.03149	0.489206	0.149331		Olink ORGAN DAMAGE(v.3311)
P20333	ENSG00000028137	TNFRSF1B	Shared all 72 up	Cytokine-cytokine interaction / TNF, IL17, PI3K-Akt, Rap1 and Ras, and JAK-STAT Signaling	3.58905	3.94336	4.79651		1.20906	2.31187	2.08911e-13	0.853577	1.80698	1.21452e-07	0.355483	1.27941	0.0575993		Olink CARDIOVASCULAR III(v.6112)
P25445	ENSG00000026103	FAS	shared Severe vs mild/control 226 up	Cytokine-cytokine interaction / TNF, IL17, PI3K-Akt, Rap1 and Ras, and JAK-STAT Signaling	3.9029	3.90119	4.7677		0.869544	1.82709	3.74747e-10	0.869341	1.82683	8.6151e-10	-0.00171083	0.998815	0.998657		Olink CARDIOVASCULAR III(v.6112)
P29474	ENSG00000164867	NOS3	shared Severe vs mild/control 226 up	Cytokine-cytokine interaction / TNF, IL17, PI3K-Akt, Rap1 and Ras, and JAK-STAT Signaling	2.98021	2.9201	3.42614		0.444604	1.36094	0.000234123	0.505928	1.42004	4.61746e-05	-0.060104	0.959195	0.73989		Olink ORGAN DAMAGE(v.3311)
P35442	ENSG00000186340	THBS2	shared Severe vs mild/control 226 up	Cytokine-cytokine interaction / TNF, IL17, PI3K-Akt, Rap1 and Ras, and JAK-STAT Signaling	4.52677	4.75295	5.39598		0.863398	1.81932	5.66875e-14	0.639481	1.55777	1.46245e-08	0.226184	1.16974	0.0865625		Olink CARDIOVASCULAR II(v.5004)
P37023	ENSG00000139567	ACVRL1	shared Severe vs mild/control 226 up	Cytokine-cytokine interaction / TNF, IL17, PI3K-Akt, Rap1 and Ras, and JAK-STAT Signaling	5.16838	5.16949	5.78648		0.621793	1.53879	0.000227698	0.617056	1.53374	0.000375097	0.00111208	1.00077	0.982769		Olink NEUROLOGY(v.8012)
P42702	ENSG00000113594	LIFR	shared Severe vs mild/control 226 up	Cytokine-cytokine interaction / TNF, IL17, PI3K-Akt, Rap1 and Ras, and JAK-STAT Signaling	2.06842	2.20448	2.90222		0.821185	1.76686	1.40054e-12	0.688272	1.61135	2.72655e-09	0.136053	1.09889	0.353551		Olink INFLAMMATION(v.3021)
P42830	ENSG00000163735	CXCL5	shared Severe vs mild/control 40 down	Cytokine-cytokine interaction / TNF, IL17, PI3K-Akt, Rap1 and Ras, and JAK-STAT Signaling	5.89958	6.07485	4.45377		-1.4983	0.35397	3.16183e-05	-1.65946	0.316558	7.03925e-06	0.17527	1.12918	0.767729		Olink INFLAMMATION(v.3021)
P49763	ENSG00000119630	PGF	shared Severe vs mild/control 226 up	Cytokine-cytokine interaction / TNF, IL17, PI3K-Akt, Rap1 and Ras, and JAK-STAT Signaling	5.99136	6.12652	6.66843		0.683151	1.60564	2.93155e-06	0.544981	1.459	0.000253689	0.135162	1.09822	0.471368		Olink CARDIOVASCULAR II(v.5004)/Olink ORGAN DAMAGE(v.3311)
P52798	ENSG00000243364	EFNA4	shared Severe vs mild/control 226 up	Cytokine-cytokine interaction / TNF, IL17, PI3K-Akt, Rap1 and Ras, and JAK-STAT Signaling	1.11291	1.22933	1.75192		0.640658	1.55904	3.25808e-05	0.521477	1.43542	0.000985563	0.116421	1.08404	0.569076		Olink NEUROLOGY(v.8012)
P52888	ENSG00000172009	THOP1	shared Severe vs mild/control 226 up	Cytokine-cytokine interaction / TNF, IL17, PI3K-Akt, Rap1 and Ras, and JAK-STAT Signaling	3.54741	3.58184	4.28985		0.735253	1.66469	7.71885e-10	0.70444	1.62951	6.92574e-09	0.0344361	1.02416	0.854178		Olink METABOLISM(v.3403)
P53539	ENSG00000125740	FOSB	shared Severe vs mild/control 226 up	Cytokine-cytokine interaction / TNF, IL17, PI3K-Akt, Rap1 and Ras, and JAK-STAT Signaling	-0.105104	0.0220733	0.435007		0.527281	1.44121	0.00224585	0.403675	1.32287	0.0267166	0.127177	1.09215	0.60594		Olink ORGAN DAMAGE(v.3311)
P55957	ENSG00000015475	BID	shared Severe vs mild/control 40 down	Cytokine-cytokine interaction / TNF, IL17, PI3K-Akt, Rap1 and Ras, and JAK-STAT Signaling	1.16847	0.86898	0.0266773		-1.14865	0.451049	0.000147721	-0.847187	0.555868	0.00701122	-0.299491	0.812539	0.4496		Olink ORGAN DAMAGE(v.3311)
P63098	ENSG00000221823	PPP3R1	shared Severe vs mild/control 226 up	Cytokine-cytokine interaction / TNF, IL17, PI3K-Akt, Rap1 and Ras, and JAK-STAT Signaling	2.07591	1.97017	2.63705		0.540521	1.4545	1.86943e-06	0.653035	1.57247	2.54309e-08	-0.105735	0.929331	0.448149		Olink NEURO EXPLORATORY(v.3911)
P78324	ENSG00000198053	SIRPA	shared Severe vs mild/control 226 up	Cytokine-cytokine interaction / TNF, IL17, PI3K-Akt, Rap1 and Ras, and JAK-STAT Signaling	1.71876	1.74559	2.26439		0.557076	1.47128	1.40975e-08	0.526807	1.44074	1.3133e-07	0.0268304	1.01877	0.832486		Olink CARDIOVASCULAR III(v.6112)
P78423	ENSG00000006210	CX3CL1	shared Severe vs mild/control 226 up	Cytokine-cytokine interaction / TNF, IL17, PI3K-Akt, Rap1 and Ras, and JAK-STAT Signaling	3.45201	3.76097	4.67589		1.21473	2.32097	8.54451e-12	0.908552	1.87716	2.51128e-07	0.308952	1.23881	0.146353		Olink INFLAMMATION(v.3021)
P78556	ENSG00000115009	CCL20	shared Severe vs mild/control 226 up	Cytokine-cytokine interaction / TNF, IL17, PI3K-Akt, Rap1 and Ras, and JAK-STAT Signaling	4.17982	3.94002	5.36554		1.1963	2.29151	3.90817e-06	1.43173	2.69769	8.25475e-08	-0.239794	0.846866	0.491301		Olink INFLAMMATION(v.3021)
P80188	ENSG00000148346	LCN2	unique Severe vs mild 33 up	Cytokine-cytokine interaction / TNF, IL17, PI3K-Akt, Rap1 and Ras, and JAK-STAT Signaling	-0.768262	-0.932476	-0.473064		0.295199	1.22705	0.013786	0.464159	1.37951	0.00024009	-0.164213	0.892415	0.313823		Olink CARDIOMETABOLIC(v.3603)
Q01344	ENSG00000091181	IL5RA	Shared all 72 up	Cytokine-cytokine interaction / TNF, IL17, PI3K-Akt, Rap1 and Ras, and JAK-STAT Signaling	1.88864	2.33296	3.24415		1.34095	2.53318	1.99129e-09	0.902441	1.86923	5.55045e-05	0.438509	1.3552	0.0954415		Olink NEUROLOGY(v.8012)
Q07011	ENSG00000049249	TNFRSF9	shared Severe vs mild/control 40 down	Cytokine-cytokine interaction / TNF, IL17, PI3K-Akt, Rap1 and Ras, and JAK-STAT Signaling	5.11573	5.13784	4.69036		-0.424289	0.745206	0.0172982	-0.449548	0.732272	0.0158704	0.0221128	1.01545	0.916717		Olink INFLAMMATION(v.3021)
Q07325	ENSG00000138755	CXCL9	Shared all 72 up	Cytokine-cytokine interaction / TNF, IL17, PI3K-Akt, Rap1 and Ras, and JAK-STAT Signaling	5.17161	5.72592	6.33635		1.16144	2.23681	6.65589e-06	0.605739	1.52176	0.0245171	0.555702	1.46988	0.0726786		Olink INFLAMMATION(v.3021)
Q16663	ENSG00000275528	CCL15	Shared all 72 up	Cytokine-cytokine interaction / TNF, IL17, PI3K-Akt, Rap1 and Ras, and JAK-STAT Signaling	5.18657	5.55467	6.32065		1.14676	2.21415	1.99445e-10	0.775634	1.71194	1.55568e-05	0.371121	1.29336	0.0799302		Olink CARDIOVASCULAR III(v.6112)
Q8IU57	ENSG00000185436	IFNLR1	shared Severe vs mild/control 226 up	Cytokine-cytokine interaction / TNF, IL17, PI3K-Akt, Rap1 and Ras, and JAK-STAT Signaling	0.385967	0.490771	0.959698		0.584241	1.49925	1.25868e-09	0.476234	1.39111	8.77259e-07	0.104804	1.07535	0.377354		Olink IMMUNE RESPONSE(v.3204)
Q8N6P7	ENSG00000142677	IL22RA1	unique Severe vs mild 33 up	Cytokine-cytokine interaction / TNF, IL17, PI3K-Akt, Rap1 and Ras, and JAK-STAT Signaling	0.888835	0.818151	1.19052		0.301685	1.23258	0.0612828	0.350428	1.27494	0.0209073	-0.0706843	0.952186	0.728186		Olink INFLAMMATION(v.3021)
Q96F46	ENSG00000177663	IL17RA	shared Severe vs mild/control 226 up	Cytokine-cytokine interaction / TNF, IL17, PI3K-Akt, Rap1 and Ras, and JAK-STAT Signaling	2.57902	2.57939	2.9706		0.421203	1.33904	0.0300374	0.412172	1.33069	0.0439778	0.00036375	1.00025	0.973853		Olink CARDIOVASCULAR III(v.6112)
Q9GZT9	ENSG00000135766	EGLN1	shared Severe vs mild/control 40 down	Cytokine-cytokine interaction / TNF, IL17, PI3K-Akt, Rap1 and Ras, and JAK-STAT Signaling	1.34465	1.14182	0.664475		-0.677447	0.625271	0.00189489	-0.47504	0.719447	0.03944	-0.20283	0.868845	0.484875		Olink IMMUNE RESPONSE(v.3204)
Q9HB29	ENSG00000115598	IL1RL2	shared Severe vs mild/control 226 up	Cytokine-cytokine interaction / TNF, IL17, PI3K-Akt, Rap1 and Ras, and JAK-STAT Signaling	2.55333	2.62974	3.021		0.469619	1.38474	1.09408e-05	0.392713	1.31286	0.000321458	0.0764111	1.05439	0.600033		Olink CARDIOVASCULAR II(v.5004)
P07339	ENSG00000117984	CTSD	shared Severe vs mild/control 226 up	Lysosome	1.07539	1.32798	1.74592		0.660083	1.58017	1.60979e-07	0.410932	1.32954	0.00132943	0.252588	1.19134	0.0968189		Olink CARDIOVASCULAR III(v.6112)
P08962	ENSG00000135404	CD63	shared Severe vs mild/control 226 up	Lysosome	4.30807	4.21002	5.23514		0.894495	1.85896	2.0403e-05	1.00377	2.00523	3.28438e-06	-0.0980532	0.934293	0.732796		Olink NEURO EXPLORATORY(v.3911)
P09668	ENSG00000103811	CTSH	shared Severe vs mild/control 226 up	Lysosome	-0.737127	-0.524344	-0.181502		0.54897	1.46304	0.000102658	0.337975	1.26398	0.0225785	0.212783	1.15892	0.241566		Olink METABOLISM(v.3403)
P35475	ENSG00000127415	IDUA	shared Severe vs mild/control 226 up	Lysosome	4.27475	4.27174	4.82731		0.566497	1.48092	0.000424894	0.564305	1.47868	0.000673684	-0.00300361	0.99792	0.991246		Olink CARDIOVASCULAR II(v.5004)
P53634	ENSG00000109861	CTSC	shared Severe vs mild/control 226 up	Lysosome	1.60544	1.74972	2.20746		0.580452	1.49532	1.08384e-05	0.442751	1.35919	0.00104797	0.144287	1.10518	0.422546		Olink NEUROLOGY(v.8012)
Q14108	ENSG00000138760	SCARB2	shared Severe vs mild/control 226 up	Lysosome	2.02502	2.19726	3.00582		0.977368	1.96887	5.71258e-05	0.803223	1.745	0.00127859	0.172246	1.12681	0.603576		Olink NEUROLOGY(v.8012)
Q99523	ENSG00000134243	SORT1	shared Severe vs mild/control 226 up	Lysosome	6.40435	6.69459	7.42825		1.00204	2.00282	2.84751e-14	0.720114	1.64731	2.32827e-08	0.290237	1.22284	0.0575993		Olink CARDIOVASCULAR II(v.5004)
Q9UBR2	ENSG00000101160	CTSZ	shared Severe vs mild/control 226 up	Lysosome	3.45713	3.60906	4.11092		0.664338	1.58484	2.48374e-08	0.509086	1.42315	2.32524e-05	0.151927	1.11105	0.308236		Olink CARDIOVASCULAR III(v.6112)
P04275	ENSG00000110799	VWF	Shared all 72 up		6.49298	7.10856	8.37063		1.86164	3.63419	3.22447e-15	1.25141	2.38073	4.33319e-08	0.610229	1.5265	0.0194999		Olink CARDIOVASCULAR III(v.6112)
P28799	ENSG00000030582	GRN	Shared all 72 up		3.93273	4.3505	4.97524		1.03923	2.05513	2.57563e-13	0.621616	1.5386	6.89069e-06	0.417614	1.33572	0.00848786		Olink CARDIOVASCULAR III(v.6112)
P14543	ENSG00000116962	NID1	Shared all 72 up		2.25668	2.59737	3.30469		1.03092	2.04333	7.49229e-16	0.695447	1.61939	1.77545e-08	0.335476	1.26179	0.0172867		Olink CARDIOMETABOLIC(v.3603)
P35542	ENSG00000148965	SAA4	shared vs. Control 16 up		2.28623	2.70018	2.81905		0.512902	1.42692	0.000321044	0.11887	1.08588	0.535468	0.408062	1.3269	0.0168178		Olink CARDIOMETABOLIC(v.3603)
P13987	ENSG00000085063	CD59	shared Severe vs mild/control 226 up		-0.652115	-0.539162	-0.165739		0.489067	1.40354	0.000360896	0.373914	1.29586	0.00889407	0.112952	1.08144	0.532524		Olink CARDIOMETABOLIC(v.3603)
P12830	ENSG00000039068	CDH1	unique Severe vs mild 33 up		1.078	1.00494	1.3941		0.316102	1.24496	0.0091037	0.388162	1.30872	0.0018503	-0.0730514	0.950625	0.685885		Olink CARDIOMETABOLIC(v.3603)
Q9UGM5	ENSG00000090512	FETUB	unique Severe vs mild 10 down		0.8094	1.0124	0.652198		-0.157202	0.896762	0.125739	-0.360084	0.779119	0.000499737	0.202996	1.15109	0.0952629		Olink CARDIOMETABOLIC(v.3603)
O95445	ENSG00000204444	APOM	unique Severe vs control 51 down		4.30297	4.06596	3.77641		-0.524063	0.695411	2.39101e-08	-0.289553	0.818155	0.00245076	-0.237015	0.848499	0.0322818		Olink CARDIOMETABOLIC(v.3603)
P06681	ENSG00000166278	C2	shared Severe vs mild/control 226 up		4.33036	4.63943	5.22596		0.879633	1.83991	5.15522e-12	0.575458	1.49015	4.50919e-06	0.309066	1.23891	0.0375506		Olink CARDIOMETABOLIC(v.3603)
P35443	ENSG00000113296	THBS4	shared vs. Control 56 down		2.76165	2.34828	2.22811		-0.530077	0.692518	0.00238288	-0.120171	0.920079	0.570791	-0.412558	0.75129	0.0501335		Olink CARDIOMETABOLIC(v.3603)
Q9BXR6	ENSG00000134389	CFHR5	Shared all 72 up		5.39887	5.94399	6.47718		1.07437	2.10581	3.6195e-15	0.531753	1.44568	4.59302e-05	0.542621	1.45662	0.000214569		Olink CARDIOMETABOLIC(v.3603)
O00161	ENSG00000092531	SNAP23	shared vs. Control 56 down		1.70942	0.997613	0.787795		-0.962095	0.513311	0.000201558	-0.209818	0.864646	0.425691	-0.724278	0.6053	0.0188133		Olink METABOLISM(v.3403)
O00214	ENSG00000116977	LGALS8	shared Severe vs mild/control 226 up		4.61831	4.60272	5.29677		0.651082	1.57035	1.15174e-05	0.675688	1.59736	8.76051e-06	-0.0155907	0.989252	0.907697		Olink NEUROLOGY(v.8012)
O00220	ENSG00000104689	TNFRSF10A	Shared all 72 up		1.81281	2.31094	3.23948		1.42055	2.67688	1.51679e-18	0.924369	1.89785	1.59277e-09	0.496184	1.41048	0.00357881		Olink CARDIOVASCULAR II(v.5004)/Olink CELL REGULATION(v.3702)
O00253	ENSG00000159723	AGRP	shared Severe vs mild/control 226 up		1.89394	2.29224	3.34749		1.45296	2.73769	2.0596e-10	1.05468	2.07725	3.74983e-06	0.398303	1.31796	0.146353		Olink CARDIOVASCULAR II(v.5004)
O00273	ENSG00000160049	DFFA	shared Severe vs mild/control 226 up		3.1436	2.77594	3.53677		0.377243	1.29886	0.0700053	0.750804	1.68273	0.000375097	-0.367658	0.77504	0.140848		Olink IMMUNE RESPONSE(v.3204)
O00308	ENSG00000198373	WWP2	shared vs. Control 56 down		4.33556	3.7957	3.67556		-0.679901	0.624208	0.00140469	-0.120141	0.920098	0.600876	-0.546853	0.684512	0.0322669		Olink NEURO EXPLORATORY(v.3911)
O14625	ENSG00000169248	CXCL11	Shared all 72 up		6.0542	6.77658	7.54277		1.44227	2.71749	2.11808e-08	0.731856	1.66077	0.00518345	0.710419	1.63628	0.0188133		Olink INFLAMMATION(v.3021)
O14867	ENSG00000156273	BACH1	unique Severe vs control 51 down		0.997138	0.683891	0.629566		-0.373709	0.771796	0.0167194	-0.0543252	0.963045	0.76553	-0.313246	0.804829	0.0945646		Olink IMMUNE RESPONSE(v.3204)
O14904	ENSG00000143816	WNT9A	unique Severe vs control 39 up		0.847337	0.98938	1.29714		0.447758	1.36392	0.00034923	0.307763	1.23779	0.0202216	0.142042	1.10347	0.386997		Olink CELL REGULATION(v.3702)
O14917	ENSG00000118946	PCDH17	shared Severe vs mild/control 226 up		2.85341	2.92783	3.39393		0.537646	1.4516	0.000141907	0.46508	1.38039	0.00138504	0.0744185	1.05294	0.737467		Olink CELL REGULATION(v.3702)
O14944	ENSG00000124882	EREG	shared vs. Control 16 up		0.173056	0.697727	0.562561		0.379496	1.30089	0.0329946	-0.135165	0.910565	0.49667	0.520437	1.43439	0.0138982		Olink NEURO EXPLORATORY(v.3911)
O15031	ENSG00000196576	PLXNB2	shared Severe vs mild/control 226 up		0.193708	0.329107	0.766543		0.566439	1.48086	1.30657e-16	0.432836	1.34988	8.98642e-11	0.135398	1.0984	0.0802908		Olink CARDIOMETABOLIC(v.3603)
O15169	ENSG00000103126	AXIN1	shared vs. Control 56 down		2.11174	1.3435	1.02201		-1.14241	0.453001	0.00012439	-0.321491	0.800242	0.282602	-0.783551	0.580935	0.0269743		Olink INFLAMMATION(v.3021)
O15357	ENSG00000165458	INPPL1	shared vs. Control 56 down		2.29403	1.39403	1.23275		-1.11452	0.461845	0.000716252	-0.161283	0.894229	0.615836	-0.916107	0.529937	0.0194999		Olink ORGAN DAMAGE(v.3311)
O15467	ENSG00000275095	CCL16	unique Severe vs control 39 up		3.74059	3.79132	4.15027		0.432694	1.34975	0.0612828	0.35895	1.28249	0.131853	0.050726	1.03579	0.859955		Olink CARDIOVASCULAR III(v.6112)
O15496	ENSG00000069764	PLA2G10	unique Severe vs control 39 up		3.72141	3.74558	4.04045		0.331619	1.25842	0.0454128	0.294868	1.22677	0.0852598	0.0241694	1.01689	0.906627		Olink NEURO EXPLORATORY(v.3911)
O43157	ENSG00000164050	PLXNB1	shared Severe vs mild/control 226 up		0.147333	0.3626	1.05622		0.900044	1.86612	1.78257e-08	0.686567	1.60945	2.05416e-05	0.215267	1.16092	0.291842		Olink NEUROLOGY(v.8012)
O43240	ENSG00000129451	KLK10	shared Severe vs mild/control 40 down		-0.507519	-0.510582	-0.991668		-0.470245	0.721842	2.50206e-06	-0.47238	0.720775	3.74067e-06	-0.00306347	0.997879	0.987495		Olink METABOLISM(v.3403)
O43570	ENSG00000074410	CA12	unique Severe vs control 39 up		1.04616	1.09148	1.40801		0.360332	1.28372	0.00576936	0.316531	1.24533	0.0216988	0.0453131	1.03191	0.818865		Olink ORGAN DAMAGE(v.3311)
O43736	ENSG00000078596	ITM2A	unique Severe vs control 39 up		0.140444	0.316736	0.61667		0.480371	1.3951	0.000250167	0.299935	1.23109	0.0284734	0.176292	1.12998	0.295326		Olink IMMUNE RESPONSE(v.3204)
O60240	ENSG00000166819	PLIN1	shared Severe vs mild/control 226 up		1.21886	1.1489	1.74536		0.49926	1.41349	0.00272769	0.575368	1.49006	0.000826472	-0.0699518	0.95267	0.765724		Olink ORGAN DAMAGE(v.3311)
O60462	ENSG00000118257	NRP2	shared Severe vs mild/control 226 up		7.48141	7.62	7.9673		0.477639	1.39246	2.82072e-15	0.341643	1.2672	6.29038e-09	0.13859	1.10083	0.0439605		Olink NEUROLOGY(v.8012)
O60609	ENSG00000146013	GFRA3	shared Severe vs mild/control 40 down		2.95211	2.69201	2.22907		-0.713756	0.60973	1.29873e-10	-0.456999	0.7285	3.4002e-05	-0.260093	0.835034	0.0467826		Olink NEUROLOGY(v.8012)
O60760	ENSG00000163106	HPGDS	unique Severe vs control 51 down		1.20502	1.09937	0.857839		-0.351854	0.783576	1.57646e-05	-0.24153	0.845848	0.00337139	-0.10565	0.929386	0.313823		Olink ORGAN DAMAGE(v.3311)
O60880	ENSG00000183918	SH2D1A	unique Severe vs control 51 down		1.0148	0.724331	0.456002		-0.575283	0.671155	6.30075e-05	-0.268329	0.830281	0.0658235	-0.290467	0.817637	0.0904944		Olink IMMUNE RESPONSE(v.3204)
O60934	ENSG00000104320	NBN	shared vs. Control 56 down		2.20439	1.4839	1.48059		-0.765457	0.588267	0.0102445	-0.00331353	0.997706	0.935892	-0.732054	0.602046	0.0412145		Olink ORGAN DAMAGE(v.3311)
O75054	ENSG00000143061	IGSF3	shared Severe vs mild/control 226 up		1.38288	1.40138	1.89867		0.523177	1.43712	1.43378e-06	0.502982	1.41714	5.59087e-06	0.0185029	1.01291	0.900563		Olink CELL REGULATION(v.3702)
O75354	ENSG00000197586	ENTPD6	unique Severe vs control 39 up		0.550429	0.803593	1.05103		0.494343	1.40868	1.81719e-09	0.247438	1.1871	0.00331934	0.253164	1.19182	0.00785592		Olink CELL REGULATION(v.3702)/Olink ORGAN DAMAGE(v.3311)
O75356	ENSG00000187097	ENTPD5	unique Severe vs control 39 up		1.2928	1.61234	1.84611		0.546581	1.46062	2.13542e-09	0.233771	1.1759	0.0139083	0.319534	1.24793	0.0020966		Olink METABOLISM(v.3403)
O75569	ENSG00000180228	PRKRA	unique Severe vs control 51 down		0.882592	0.630827	0.446305		-0.442304	0.735958	0.000980019	-0.184522	0.87994	0.201269	-0.251765	0.839868	0.124992		Olink ORGAN DAMAGE(v.3311)
O75594	ENSG00000008438	PGLYRP1	shared Severe vs mild/control 226 up		5.40649	5.48262	6.33346		0.912945	1.88289	3.30022e-08	0.840828	1.79108	5.58233e-07	0.0761307	1.05419	0.770115		Olink CARDIOVASCULAR III(v.6112)
O75791	ENSG00000100351	GRAP2	shared vs. Control 56 down		1.09094	0.584762	0.416534		-0.710818	0.610973	0.000690903	-0.168228	0.889935	0.420937	-0.51605	0.699284	0.0412145		Olink METABOLISM(v.3403)
O76070	ENSG00000173267	SNCG	shared Severe vs mild/control 226 up		0.508206	0.628082	1.47562		0.934855	1.9117	1.14967e-05	0.820824	1.76641	0.000164467	0.119876	1.08664	0.724684		Olink NEURO EXPLORATORY(v.3911)
O94760	ENSG00000153904	DDAH1	shared Severe vs mild/control 226 up		1.50904	1.57912	2.00653		0.499671	1.41389	0.000355249	0.430037	1.34727	0.0029681	0.0700807	1.04978	0.742615		Olink CELL REGULATION(v.3702)
O94779	ENSG00000149972	CNTN5	Shared all 22 down		3.1944	2.65909	2.18865		-1.00725	0.497493	1.58254e-14	-0.470706	0.721611	0.000188427	-0.536546	0.68942	0.000159893		Olink NEUROLOGY(v.8012)
O94907	ENSG00000107984	DKK1	Shared all 72 up		6.36214	6.89501	7.91122		1.52981	2.88749	3.99552e-12	1.0024	2.00333	3.86657e-06	0.527412	1.44134	0.0371625		Olink CARDIOVASCULAR II(v.5004)
O94992	ENSG00000186834	HEXIM1	shared Severe vs mild/control 226 up		3.81657	3.33839	4.50073		0.646163	1.565	0.00197642	1.13566	2.19718	1.56069e-07	-0.489493	0.712276	0.0513513		Olink IMMUNE RESPONSE(v.3204)
O95183	ENSG00000168899	VAMP5	shared Severe vs mild/control 226 up		0.109444	0.116991	0.706173		0.602175	1.518	2.251e-05	0.59333	1.50873	4.52582e-05	0.00754736	1.00525	0.962748		Olink CELL REGULATION(v.3702)
O95185	ENSG00000182168	UNC5C	unique Severe vs mild 33 up		1.93165	1.84454	2.23962		0.307966	1.23796	0.0252811	0.398951	1.31855	0.00613563	-0.0871122	0.941405	0.685885		Olink NEUROLOGY(v.8012)
O95502	ENSG00000221890	NPTXR	shared vs. Control 56 down		2.022	1.59553	1.68586		-0.323571	0.79909	0.0221379	0.0903302	1.06461	0.559023	-0.42203	0.746374	0.0121865		Olink METABOLISM(v.3403)
O95544	ENSG00000008130	NADK	shared Severe vs mild/control 226 up		4.70475	4.5636	6.08963		1.3548	2.55761	1.9553e-05	1.50729	2.84275	3.74067e-06	-0.141146	0.906799	0.750021		Olink METABOLISM(v.3403)
O95644	ENSG00000131196	NFATC1	shared vs. Control 56 down		0.487323	-0.275698	-0.553284		-1.07034	0.476206	2.6732e-06	-0.277586	0.82497	0.23159	-0.770997	0.586012	0.0035704		Olink CELL REGULATION(v.3702)
O95988	ENSG00000213231	TCL1B	unique Severe vs control 39 up		-0.545252	-0.270236	-0.20002		0.355315	1.27926	0.0878703	0.0702151	1.04987	0.772357	0.275017	1.21001	0.286096		Olink CELL REGULATION(v.3702)
O95994	ENSG00000106541	AGR2	shared Severe vs mild/control 226 up		2.13953	2.38648	3.40809		1.26971	2.41113	2.02078e-09	1.02155	2.0301	1.69373e-06	0.246946	1.18669	0.355845		Olink ORGAN DAMAGE(v.3311)
O95998	ENSG00000137496	IL18BP	shared Severe vs mild/control 226 up		4.08576	4.25995	4.90337		0.825807	1.77253	5.72102e-09	0.648434	1.56747	5.59849e-06	0.174191	1.12833	0.321493		Olink CARDIOVASCULAR III(v.6112)
P00352	ENSG00000165092	ALDH1A1	shared Severe vs mild/control 226 up		1.84308	2.00657	2.3682		0.51958	1.43354	4.22064e-06	0.359453	1.28294	0.00186961	0.163492	1.11999	0.267445		Olink METABOLISM(v.3403)
P00797	ENSG00000143839	REN	shared Severe vs mild/control 226 up		4.79021	4.87101	5.97309		1.18916	2.2802	2.36236e-09	1.10656	2.15331	4.5157e-08	0.0807963	1.0576	0.779492		Olink CARDIOVASCULAR II(v.5004)
P01033	ENSG00000102265	TIMP1	Shared all 72 up		2.68306	3.0862	3.90677		1.2107	2.3145	1.11887e-21	0.811855	1.75547	7.79642e-12	0.398848	1.31845	0.00192163		Olink CARDIOMETABOLIC(v.3603)
P01034	ENSG00000101439	CST3	shared Severe vs mild/control 226 up		3.92431	4.12597	5.1551		1.23032	2.34619	1.80179e-10	1.02696	2.03773	1.12689e-07	0.201665	1.15002	0.405451		Olink CARDIOMETABOLIC(v.3603)
P01137	ENSG00000105329	TGFB1	shared vs. Control 16 up		5.57251	6.05844	6.17927		0.579722	1.49456	4.04394e-05	0.120831	1.08736	0.541256	0.477516	1.39234	0.00359029		Olink INFLAMMATION(v.3021)
P01229	ENSG00000104826	LHB	unique Severe vs mild 33 up		0.585652	0.303289	0.798493		0.212841	1.15897	0.468629	0.488255	1.40275	0.0809257	-0.282363	0.822243	0.4058		Olink ORGAN DAMAGE(v.3311)
P01241	ENSG00000259384	GH1	shared vs. Control 16 up		3.99297	5.38138	5.6918		1.68695	3.21975	0.000193921	0.310425	1.24007	0.570791	1.38382	2.60959	0.0100551		Olink CARDIOVASCULAR II(v.5004)
P01375	ENSG00000204490	TNF	shared vs. Control 16 up		1.29493	1.77509	1.97326		0.656575	1.57634	0.000188583	0.19817	1.14724	0.363885	0.474122	1.38907	0.0233637		Olink INFLAMMATION(v.3021)
P01589	ENSG00000134460	IL2RA	Shared all 72 up		1.97121	2.3839	3.15809		1.18336	2.27106	5.63564e-19	0.770683	1.70608	8.6151e-10	0.41268	1.33116	0.00306272		Olink CARDIOVASCULAR III(v.6112)
P01833	ENSG00000162896	PIGR	unique Severe vs control 39 up		1.69468	1.76665	2.06102		0.373497	1.29549	1.1966e-11	0.294372	1.22635	5.16049e-08	0.0719763	1.05116	0.273722		Olink CARDIOVASCULAR II(v.5004)
P02452	ENSG00000108821	COL1A1	unique Severe vs control 51 down		1.71909	1.55433	1.28048		-0.425058	0.744809	1.57745e-05	-0.273856	0.827106	0.00916698	-0.164761	0.892077	0.19828		Olink CARDIOVASCULAR III(v.6112)
P03956	ENSG00000196611	MMP1	shared vs. Control 16 up		8.49881	9.57797	9.38968		0.88709	1.84944	0.00510497	-0.188296	0.877642	0.616	1.07754	2.11044	0.00359029		Olink INFLAMMATION(v.3021)
P04080	ENSG00000160213	CSTB	shared Severe vs mild/control 226 up		2.14282	2.107	2.70509		0.5451	1.45912	0.0119567	0.585194	1.50024	0.00933057	-0.035821	0.975477	0.900563		Olink CARDIOVASCULAR III(v.6112)
P04179	ENSG00000112096	SOD2	shared Severe vs mild/control 226 up		8.7715	8.83418	9.20266		0.421507	1.33933	7.54939e-11	0.361736	1.28497	2.78035e-08	0.0626735	1.0444	0.469454		Olink CARDIOVASCULAR II(v.5004)
P04792	ENSG00000106211	HSPB1	shared Severe vs mild/control 226 up		6.79419	6.70277	7.74796		0.885382	1.84725	0.00226993	0.997529	1.99658	0.000863303	-0.0914187	0.938599	0.797578		Olink CARDIOVASCULAR II(v.5004)
P05089	ENSG00000118520	ARG1	unique Severe vs control 51 down		0.463625	0.221562	-0.204895		-0.673131	0.627144	0.0126907	-0.426458	0.744087	0.146627	-0.242063	0.845535	0.493103		Olink METABOLISM(v.3403)
P05121	ENSG00000106366	SERPINE1	shared vs. Control 16 up		3.92933	4.57102	4.62249		0.66403	1.5845	0.0024183	0.0514731	1.03632	0.914192	0.631396	1.54906	0.0161032		Olink CARDIOVASCULAR III(v.6112)
P05154	ENSG00000188488	SERPINA5	unique Mild vs control 21 down		6.21722	5.86922	5.92211		-0.295107	0.815012	0.0798718	0.0528936	1.03734	0.80613	-0.34662	0.786424	0.0852612		Olink CARDIOMETABOLIC(v.3603)
P06748	ENSG00000181163	NPM1	unique Severe vs mild 33 up		5.40005	4.52338	5.22681		-0.173241	0.886848	0.516601	0.6731	1.5945	0.0405928	-0.890641	0.539374	0.0165098		Olink NEURO EXPLORATORY(v.3911)
P07196	ENSG00000277586	NEFL	Shared all 72 up		1.80468	2.37399	3.68379		1.87454	3.66684	2.60693e-13	1.30764	2.47537	1.86083e-07	0.566893	1.48133	0.0513513		Olink NEURO EXPLORATORY(v.3911)
P07451	ENSG00000164879	CA3	shared Severe vs mild/control 226 up		0.605231	0.699984	1.45976		0.839767	1.78976	3.46748e-06	0.749813	1.68158	4.75055e-05	0.0947532	1.06788	0.741551		Olink CARDIOMETABOLIC(v.3603)
P08833	ENSG00000146678	IGFBP1	shared Severe vs mild/control 226 up		2.19974	1.99185	2.9214		0.743794	1.67457	0.0163981	0.944511	1.92454	0.00315762	-0.207884	0.865806	0.65213		Olink CARDIOVASCULAR III(v.6112)
P09237	ENSG00000137673	MMP7	shared Severe vs mild/control 226 up		4.44535	4.91697	5.75326		1.31033	2.47999	3.18885e-07	0.838129	1.78773	0.00131591	0.471625	1.38667	0.128965		Olink CARDIOVASCULAR II(v.5004)
P09238	ENSG00000166670	MMP10	shared Severe vs mild/control 226 up		6.32216	6.43409	6.91413		0.608699	1.52488	4.85818e-05	0.492509	1.40689	0.0013694	0.111935	1.08068	0.56832		Olink INFLAMMATION(v.3021)
P09417	ENSG00000151552	QDPR	shared Severe vs mild/control 226 up		3.13107	3.21097	3.67281		0.528139	1.44207	0.0020853	0.454394	1.37021	0.0111481	0.0798937	1.05694	0.777163		Olink METABOLISM(v.3403)
P09467	ENSG00000165140	FBP1	Shared all 72 up		0.382071	1.09736	2.48643		2.08033	4.22903	6.10062e-16	1.37411	2.59208	2.84304e-08	0.706219	1.63152	0.0126122		Olink METABOLISM(v.3403)
P09525	ENSG00000196975	ANXA4	unique Severe vs control 51 down		0.678779	0.404433	0.141023		-0.535371	0.689981	0.000110435	-0.263411	0.833116	0.0771714	-0.274346	0.826825	0.100817		Olink METABOLISM(v.3403)
P09601	ENSG00000100292	HMOX1	Shared all 72 up		9.00216	9.40922	10.3525		1.3344	2.5217	3.76804e-14	0.932443	1.90851	5.81154e-08	0.401953	1.3213	0.0433487		Olink CARDIOVASCULAR II(v.5004)
P09603	ENSG00000184371	CSF1	Shared all 72 up		8.15515	8.59054	9.16919		1.00151	2.0021	1.36071e-12	0.569956	1.48448	3.64916e-05	0.431557	1.34869	0.00630592		Olink INFLAMMATION(v.3021)
P09758	ENSG00000184292	TACSTD2	shared Severe vs mild/control 226 up		2.64095	2.68104	3.53278		0.90241	1.86919	9.97076e-13	0.85982	1.81481	2.07166e-11	0.0400924	1.02818	0.811817		Olink CELL REGULATION(v.3702)
P09769	ENSG00000000938	FGR	shared vs. Control 56 down		3.06046	2.27319	2.07538		-0.999779	0.500077	0.00113467	-0.197809	0.871874	0.570791	-0.79329	0.577027	0.0315443		Olink ORGAN DAMAGE(v.3311)
P0CG37	ENSG00000136698	CFC1	shared Severe vs mild/control 226 up		0.663629	0.767936	1.11942		0.46006	1.3756	0.000310116	0.354101	1.27819	0.00766622	0.104306	1.07498	0.534171		Olink CELL REGULATION(v.3702)
P0DOY2	ENSG00000211677	IGLC2	Shared all 72 up		4.35038	4.83612	5.56888		1.20566	2.30642	2.09415e-10	0.721807	1.64925	0.000131816	0.483849	1.39847	0.0269743		Olink CARDIOMETABOLIC(v.3603)
P10145	ENSG00000169429	CXCL8	unique Severe vs control 39 up		3.88892	4.29683	4.77875		0.843371	1.79424	0.00232582	0.481923	1.3966	0.138577	0.407906	1.32676	0.267775		Olink INFLAMMATION(v.3021)
P11226	ENSG00000165471	MBL2	unique Severe vs control 39 up		6.97047	7.43155	7.70946		0.735351	1.6648	0.040042	0.277912	1.21244	0.50896	0.46108	1.37657	0.317571		Olink CARDIOMETABOLIC(v.3603)
P11274	ENSG00000186716	BCR	shared vs. Control 56 down		1.63386	1.07999	0.863148		-0.800757	0.574048	0.000839926	-0.216843	0.860446	0.388978	-0.562953	0.676915	0.0513513		Olink CELL REGULATION(v.3702)
P12104	ENSG00000145384	FABP2	unique Severe vs control 51 down		5.83657	5.50235	5.18497		-0.633288	0.644705	0.0197713	-0.317381	0.802526	0.323719	-0.334215	0.793215	0.351177		Olink CARDIOVASCULAR II(v.5004)
P12724	ENSG00000169397	RNASE3	unique Severe vs mild 33 up		1.37938	1.05065	1.69543		0.316046	1.24491	0.136296	0.649292	1.5684	0.00287695	-0.328737	0.796233	0.227034		Olink METABOLISM(v.3403)
P12931	ENSG00000197122	SRC	shared vs. Control 56 down		4.23014	3.11877	3.22389		-1.08018	0.472969	0.00244819	0.105117	1.07558	0.91393	-1.13387	0.455691	0.00708614		Olink CARDIOVASCULAR II(v.5004)
P13236	ENSG00000275302	CCL4	unique Severe vs control 39 up		4.08591	4.44236	4.69323		0.587702	1.50285	0.00241049	0.25087	1.18992	0.273737	0.35645	1.28027	0.146444		Olink INFLAMMATION(v.3021)
P13284	ENSG00000216490	IFI30	shared Severe vs mild/control 226 up		1.40747	1.5337	2.52648		1.09247	2.13238	8.57882e-10	0.973983	1.96426	6.21743e-08	0.126233	1.09144	0.626438		Olink NEURO EXPLORATORY(v.3911)
P13385	ENSG00000241186	TDGF1	shared Severe vs mild/control 226 up		0.0308208	0.535789	1.49006		1.46952	2.76929	0.000133563	0.960306	1.94572	0.0170271	0.504968	1.41909	0.308384		Olink NEURO EXPLORATORY(v.3911)
P13501	ENSG00000271503	CCL5	unique Mild vs control 5 up		1.91582	2.60767	2.18068		0.264861	1.20152	0.497364	-0.426992	0.743811	0.171121	0.679201	1.60125	0.0653743		Olink CARDIOMETABOLIC(v.3603)
P13686	ENSG00000102575	ACP5	Shared all 72 up		1.80037	2.29216	3.3245		1.52016	2.86823	1.32566e-19	1.03076	2.04309	9.06316e-11	0.489407	1.40387	0.00533517		Olink CARDIOVASCULAR III(v.6112)
P14317	ENSG00000180353	HCLS1	shared Severe vs mild/control 40 down		4.67472	3.9864	3.18873		-1.49972	0.353621	0.000717918	-0.805729	0.572073	0.0916856	-0.688325	0.620574	0.22348		Olink IMMUNE RESPONSE(v.3204)
P14384	ENSG00000135678	CPM	unique Severe vs mild 33 up		5.30721	5.07356	5.49131		0.184105	1.13611	0.115707	0.420093	1.33801	0.000487075	-0.233653	0.850479	0.100817		Olink NEUROLOGY(v.8012)
P15085	ENSG00000091704	CPA1	shared Severe vs mild/control 226 up		3.91952	4.19795	5.49211		1.57514	2.97964	6.48353e-11	1.29647	2.45627	7.81181e-08	0.278434	1.21288	0.355903		Olink CARDIOVASCULAR III(v.6112)
P15086	ENSG00000153002	CPB1	shared Severe vs mild/control 226 up		3.98605	4.21117	5.40608		1.41469	2.66602	1.3544e-08	1.19229	2.28515	2.25581e-06	0.225125	1.16888	0.493103		Olink CARDIOVASCULAR III(v.6112)
P15311	ENSG00000092820	EZR	shared Severe vs mild/control 226 up		3.86595	3.73608	4.3953		0.509928	1.42398	0.000315605	0.645896	1.56471	9.62904e-06	-0.129874	0.913911	0.468859		Olink NEUROLOGY(v.8012)
P15692	ENSG00000112715	VEGFA	shared vs. Control 16 up		8.68867	9.18878	9.40834		0.69948	1.62392	5.81074e-05	0.219565	1.16438	0.295577	0.495211	1.40953	0.0168178		Olink INFLAMMATION(v.3021)
P15907	ENSG00000073849	ST6GAL1	Shared all 72 up		1.09357	1.59497	2.11203		1.0155	2.0216	5.36677e-12	0.515297	1.42929	0.000372922	0.500198	1.41441	0.00214653		Olink CARDIOMETABOLIC(v.3603)
P16284	ENSG00000261371	PECAM1	unique Mild vs control 21 down		3.03835	2.71882	2.99171		-0.0466473	0.968184	0.685607	0.272885	1.20822	0.0765748	-0.323883	0.798917	0.0513513		Olink CARDIOVASCULAR III(v.6112)
P16444	ENSG00000015413	DPEP1	unique Severe vs control 51 down		1.76446	1.6253	1.39781		-0.346773	0.786341	0.0107511	-0.227486	0.854122	0.152121	-0.13916	0.908047	0.452698		Olink NEURO EXPLORATORY(v.3911)
P16455	ENSG00000170430	MGMT	unique Mild vs control 21 down		2.66676	2.07626	2.36749		-0.299272	0.812662	0.221576	0.291224	1.22368	0.393667	-0.603338	0.658229	0.0609411		Olink IMMUNE RESPONSE(v.3204)
P16860	ENSG00000120937	NPPB	shared Severe vs mild/control 226 up		0.0368333	0.27442	1.17449		1.13404	2.19472	3.93119e-07	0.896149	1.86109	7.88137e-05	0.237587	1.17902	0.409444		Olink CARDIOVASCULAR II(v.5004)
P17405	ENSG00000166311	SMPD1	Shared all 72 up		2.80213	3.34096	4.25335		1.44493	2.7225	2.29554e-17	0.908898	1.87761	2.1051e-08	0.536034	1.44998	0.00308496		Olink NEUROLOGY(v.8012)
P18510	ENSG00000136689	IL1RN	shared Severe vs mild/control 226 up		4.97996	4.95275	5.45747		0.454349	1.37016	0.0851072	0.489502	1.40396	0.0771714	-0.0272135	0.981314	0.920118		Olink CARDIOVASCULAR II(v.5004)
P18627	ENSG00000089692	LAG3	unique Severe vs control 39 up		0.632288	0.789931	1.08049		0.444625	1.36096	0.000254872	0.290558	1.22311	0.0245171	0.157644	1.11546	0.317571		Olink IMMUNE RESPONSE(v.3204)
P19429	ENSG00000129991	TNNI3	shared Severe vs mild/control 226 up		6.56114	6.66632	7.7404		1.1561	2.22854	0.00510497	1.05665	2.08009	0.0144776	0.105178	1.07563	0.870957		Olink ORGAN DAMAGE(v.3311)
P19474	ENSG00000132109	TRIM21	shared Severe vs mild/control 226 up		1.0091	0.927251	1.50296		0.473031	1.38802	0.000450644	0.561135	1.47543	5.24169e-05	-0.081851	0.944845	0.649363		Olink IMMUNE RESPONSE(v.3204)
P19801	ENSG00000002726	AOC1	shared Severe vs mild/control 226 up		-0.743348	-0.8254	-0.293273		0.443919	1.36029	0.00302402	0.528122	1.44205	0.000644176	-0.0820521	0.944713	0.714396		Olink NEURO EXPLORATORY(v.3911)
P19883	ENSG00000134363	FST	shared Severe vs mild/control 226 up		9.03964	8.96545	9.95177		0.90049	1.8667	7.92978e-09	0.977719	1.96935	1.17593e-09	-0.0741864	0.949878	0.73989		Olink CARDIOVASCULAR II(v.5004)
P19957	ENSG00000124102	PI3	shared Severe vs mild/control 226 up		0.554737	0.531787	0.868805		0.326883	1.2543	0.096285	0.343643	1.26896	0.097666	-0.0229508	0.984218	0.952718		Olink CARDIOVASCULAR III(v.6112)
P19971	ENSG00000025708	TYMP	Shared all 72 up		3.96404	4.71032	5.53762		1.53752	2.90295	9.63325e-13	0.802277	1.74385	0.000135171	0.735243	1.66468	0.00194441		Olink METABOLISM(v.3403)
P20062	ENSG00000185339	TCN2	Shared all 72 up		2.90964	3.30569	4.15125		1.23672	2.35662	1.97312e-20	0.842104	1.79266	2.49141e-11	0.394614	1.31459	0.00424129		Olink CARDIOMETABOLIC(v.3603)
P20160	ENSG00000172232	AZU1	unique Severe vs mild 33 up		2.52016	1.90192	2.94069		0.420537	1.33843	0.11012	1.04645	2.06544	0.000116866	-0.614968	0.652944	0.0525827		Olink CARDIOVASCULAR III(v.6112)
P20472	ENSG00000100362	PVALB	shared Severe vs mild/control 226 up		3.12419	2.62314	3.89604		0.73268	1.66172	0.0298854	1.24414	2.36878	0.000321458	-0.501054	0.70659	0.235069		Olink ORGAN DAMAGE(v.3311)
P20711	ENSG00000132437	DDC	shared Severe vs mild/control 226 up		3.52016	3.57039	3.91669		0.397509	1.31723	0.00491836	0.347363	1.27223	0.0195081	0.0502308	1.03543	0.811817		Olink METABOLISM(v.3403)
P21757	ENSG00000038945	MSR1	shared Severe vs mild/control 226 up		4.66412	4.96161	5.7892		1.10609	2.15262	2.3693e-12	0.813544	1.75752	1.73857e-07	0.297488	1.229	0.109745		Olink NEUROLOGY(v.8012)
P21980	ENSG00000198959	TGM2	unique Severe vs control 51 down		8.2052	7.98791	7.72242		-0.510466	0.701996	0.000993381	-0.265493	0.831914	0.08829	-0.217287	0.860182	0.256631		Olink CARDIOVASCULAR II(v.5004)
P22301	ENSG00000136634	IL10	Shared all 72 up		1.08719	1.64258	3.20013		2.09534	4.27327	8.38699e-20	1.54423	2.91649	2.58217e-12	0.551108	1.46521	0.023775		Olink IMMUNE RESPONSE(v.3204)/Olink INFLAMMATION(v.3021)
P22681	ENSG00000110395	CBL	shared Severe vs mild/control 40 down		3.22272	2.60913	2.01589		-1.20401	0.434067	0.000122812	-0.591357	0.663718	0.0771714	-0.613583	0.653571	0.107292		Olink CELL REGULATION(v.3702)
P23141	ENSG00000198848	CES1	shared Severe vs mild/control 226 up		1.19142	0.962202	2.1139		0.936539	1.91393	2.14674e-06	1.1636	2.24016	1.33427e-08	-0.229219	0.853097	0.374191		Olink CARDIOMETABOLIC(v.3603)
P23229	ENSG00000091409	ITGA6	unique Severe vs control 51 down		1.73653	1.57706	1.32446		-0.426127	0.744257	0.000821776	-0.252596	0.839384	0.0527826	-0.159476	0.89535	0.321493		Olink IMMUNE RESPONSE(v.3204)
P23443	ENSG00000108443	RPS6KB1	unique Severe vs control 51 down		0.235198	-0.0663044	-0.240264		-0.502107	0.706075	0.00926479	-0.173959	0.886407	0.385852	-0.301502	0.811407	0.205683		Olink NEURO EXPLORATORY(v.3911)
P23526	ENSG00000101444	AHCY	unique Severe vs mild 33 up		0.869615	0.637153	1.0994		0.229785	1.17266	0.116682	0.448497	1.36462	0.000799289	-0.232461	0.851182	0.132326		Olink METABOLISM(v.3403)
P23588	ENSG00000063046	EIF4B	unique Severe vs control 51 down		5.67953	5.35064	4.97695		-0.753476	0.593173	0.00449946	-0.373699	0.771801	0.159438	-0.328883	0.796153	0.314318		Olink NEURO EXPLORATORY(v.3911)
P24001	ENSG00000008517	IL32	unique Severe vs control 39 up		2.90186	3.04065	3.26291		0.364666	1.28758	0.0223989	0.222258	1.16656	0.20105	0.138793	1.10098	0.510581		Olink NEURO EXPLORATORY(v.3911)
P24071	ENSG00000186431	FCAR	shared Severe vs mild/control 226 up		0.570125	0.517807	0.95065		0.372835	1.29489	0.000111205	0.427575	1.34497	1.60886e-05	-0.0523183	0.964385	0.709763		Olink NEURO EXPLORATORY(v.3911)
P24592	ENSG00000167779	IGFBP6	unique Severe vs mild 33 up		3.81371	3.73185	4.11275		0.299044	1.23033	0.061788	0.382585	1.30368	0.0237148	-0.0818593	0.944839	0.747689		Olink CARDIOMETABOLIC(v.3603)
P27352	ENSG00000134812	CBLIF	unique Severe vs control 51 down		5.52037	5.31929	5.06499		-0.435092	0.739647	0.0502386	-0.254302	0.838392	0.333915	-0.201077	0.869901	0.510794		Olink CARDIOVASCULAR II(v.5004)
P27695	ENSG00000100823	APEX1	unique Severe vs control 51 down		2.94692	2.38176	1.85787		-1.09506	0.468117	0.00328235	-0.523896	0.695491	0.198854	-0.565158	0.675881	0.235268		Olink METABOLISM(v.3403)
P28845	ENSG00000117594	HSD11B1	shared Severe vs mild/control 226 up		1.30325	1.24047	1.66746		0.362933	1.28604	0.00397681	0.425776	1.3433	0.00107156	-0.062779	0.957418	0.742615		Olink IMMUNE RESPONSE(v.3204)
P28907	ENSG00000004468	CD38	shared Severe vs mild/control 226 up		3.58406	3.88442	4.67648		1.09295	2.1331	3.40743e-12	0.791332	1.73067	3.30452e-07	0.300362	1.23145	0.0952629		Olink NEUROLOGY(v.8012)
P30041	ENSG00000117592	PRDX6	unique Severe vs control 51 down		3.49881	3.25741	3.17019		-0.344156	0.787769	0.0943626	-0.087218	0.941336	0.686033	-0.241404	0.845922	0.347862		Olink CELL REGULATION(v.3702)
P30044	ENSG00000126432	PRDX5	shared vs. Control 56 down		4.93583	4.05459	3.71188		-1.23901	0.423663	0.00203336	-0.342716	0.788555	0.445179	-0.885099	0.54145	0.0684619		Olink IMMUNE RESPONSE(v.3204)
P30048	ENSG00000165672	PRDX3	unique Mild vs control 21 down		-0.395942	-0.750191	-0.638518		-0.242577	0.845234	0.131505	0.111673	1.08048	0.647351	-0.361236	0.778497	0.0854296		Olink IMMUNE RESPONSE(v.3204)
P30519	ENSG00000103415	HMOX2	unique Severe vs mild 33 up		2.30979	1.82794	2.73238		0.422583	1.34033	0.100939	0.882637	1.84374	0.000241341	-0.491152	0.711457	0.0837212		Olink NEURO EXPLORATORY(v.3911)
P30530	ENSG00000167601	AXL	shared Severe vs mild/control 226 up		7.25583	7.08441	7.58921		0.352339	1.27663	0.00148666	0.518561	1.43253	5.75636e-06	-0.171418	0.887969	0.241566		Olink CARDIOVASCULAR III(v.6112)
P30838	ENSG00000108602	ALDH3A1	unique Severe vs control 39 up		-0.916894	-0.780122	-0.470332		0.452502	1.36841	0.0133693	0.30979	1.23953	0.114709	0.136772	1.09944	0.572934		Olink ORGAN DAMAGE(v.3311)
P32926	ENSG00000134757	DSG3	Shared all 22 down		4.3101	3.79682	3.2326		-1.06196	0.47898	1.54307e-12	-0.55437	0.680954	0.000161034	-0.507594	0.703394	0.00214653		Olink NEURO EXPLORATORY(v.3911)
P33151	ENSG00000179776	CDH5	unique Severe vs control 51 down		2.4721	2.20484	2.12248		-0.340764	0.789623	0.000160505	-0.0823559	0.944514	0.462499	-0.267262	0.830895	0.0139354		Olink CARDIOVASCULAR III(v.6112)
P35218	ENSG00000174990	CA5A	Shared all 72 up		0.810177	1.49195	2.76359		1.97995	3.94479	2.11279e-12	1.293	2.45038	3.04914e-06	0.686943	1.60987	0.0322818		Olink CARDIOVASCULAR II(v.5004)
P35247	ENSG00000133661	SFTPD	Shared all 72 up		0.366473	0.70556	1.52804		1.16753	2.24627	1.13284e-11	0.826102	1.77289	1.23461e-06	0.34143	1.26701	0.0869409		Olink CARDIOVASCULAR III(v.6112)
P36222	ENSG00000133048	CHI3L1	shared Severe vs mild/control 226 up		1.9004	2.04702	3.66628		1.78045	3.43533	1.14202e-11	1.63006	3.09526	7.72544e-10	0.146618	1.10697	0.686685		Olink CARDIOVASCULAR III(v.6112)
P36269	ENSG00000099998	GGT5	unique Severe vs control 39 up		2.73814	2.85168	3.08363		0.343223	1.26859	0.00663889	0.231956	1.17443	0.0931271	0.113538	1.08188	0.493884		Olink NEURO EXPLORATORY(v.3911)
P39060	ENSG00000182871	COL18A1	unique Severe vs control 39 up		1.38341	1.65328	1.77542		0.394743	1.31471	0.00209188	0.122134	1.08834	0.403245	0.269876	1.2057	0.0813646		Olink CARDIOMETABOLIC(v.3603)
P39900	ENSG00000262406	MMP12	shared Severe vs mild/control 40 down		4.66105	4.38073	3.40905		-1.22128	0.428902	3.08552e-10	-0.950742	0.517366	9.91698e-07	-0.280328	0.823404	0.262638		Olink CARDIOVASCULAR II(v.5004)
P40121	ENSG00000042493	CAPG	unique Severe vs control 51 down		3.28181	2.89388	2.44976		-0.850286	0.554675	0.00653497	-0.444116	0.735034	0.184987	-0.387926	0.764227	0.32977		Olink ORGAN DAMAGE(v.3311)
P40259	ENSG00000007312	CD79B	unique Severe vs control 39 up		1.45131	1.56021	1.82245		0.383655	1.30464	0.00220879	0.262237	1.19934	0.04191	0.108905	1.07841	0.493884		Olink METABOLISM(v.3403)
P41159	ENSG00000174697	LEP	shared vs. Control 16 up		4.47042	5.11899	5.50822		0.963575	1.95014	0.0019036	0.389227	1.30969	0.353253	0.635369	1.55334	0.0905525		Olink CARDIOVASCULAR II(v.5004)
P41208	ENSG00000147400	CETN2	unique Severe vs control 51 down		-0.0238771	-0.370471	-0.455705		-0.470074	0.721928	0.0163981	-0.0852334	0.942632	0.629676	-0.346594	0.786439	0.139043		Olink NEURO EXPLORATORY(v.3911)
P42574	ENSG00000164305	CASP3	shared vs. Control 56 down		4.2104	3.63792	3.43858		-0.815279	0.568299	0.00482357	-0.199345	0.870946	0.500667	-0.586657	0.665884	0.0940415		Olink CARDIOVASCULAR III(v.6112)
P42701	ENSG00000096996	IL12RB1	unique Severe vs control 39 up		0.4227	0.589787	0.863493		0.433827	1.35081	1.23972e-05	0.273707	1.20891	0.00933057	0.167087	1.12279	0.176157		Olink IMMUNE RESPONSE(v.3204)
P43234	ENSG00000256043	CTSO	shared Severe vs mild/control 226 up		0.522735	0.618049	0.971102		0.45258	1.36849	3.62297e-08	0.355602	1.27952	1.8831e-05	0.0953135	1.0683	0.355845		Olink METABOLISM(v.3403)
P43629	ENSG00000167633	KIR3DL1	unique Severe vs control 39 up		0.215829	0.337927	0.561636		0.353396	1.27756	0.068174	0.22371	1.16773	0.288572	0.122097	1.08832	0.647485		Olink ORGAN DAMAGE(v.3311)
P46379	ENSG00000096155	BAG6	unique Severe vs mild 33 up		1.9945	1.78227	2.25149		0.256993	1.19499	0.0558252	0.454192	1.37002	0.000274281	-0.212229	0.863202	0.144731		Olink METABOLISM(v.3403)
P49023	ENSG00000089159	PXN	unique Severe vs control 51 down		3.33302	2.83601	2.5692		-0.772703	0.58532	0.00768299	-0.266813	0.831153	0.412929	-0.497007	0.708575	0.166928		Olink ORGAN DAMAGE(v.3311)
P49789	ENSG00000189283	FHIT	unique Severe vs control 51 down		0.00293542	-0.181749	-0.339398		-0.350851	0.784121	0.0518791	-0.157649	0.896485	0.432017	-0.184684	0.879842	0.421153		Olink NEURO EXPLORATORY(v.3911)
P50135	ENSG00000150540	HNMT	shared Severe vs mild/control 226 up		6.08879	6.18549	6.55798		0.471626	1.38667	0.0138931	0.373957	1.2959	0.0673517	0.0967036	1.06933	0.739377		Olink IMMUNE RESPONSE(v.3204)
P50225	ENSG00000196502	SULT1A1	shared Severe vs mild/control 40 down		2.22485	1.94387	1.23646		-1.00967	0.49666	0.000131551	-0.72299	0.605841	0.00844547	-0.280977	0.823034	0.4058		Olink INFLAMMATION(v.3021)
P50995	ENSG00000122359	ANXA11	shared Severe vs mild/control 40 down		-0.0660167	-0.428644	-0.964834		-0.890387	0.539469	0.000122812	-0.52988	0.692612	0.0298047	-0.362628	0.777747	0.224385		Olink METABOLISM(v.3403)
P51161	ENSG00000170231	FABP6	unique Severe vs mild 33 up		-0.0708333	-0.298802	0.112348		0.183181	1.13538	0.361499	0.412625	1.33111	0.0432213	-0.227969	0.853836	0.368717		Olink CARDIOVASCULAR II(v.5004)
P51693	ENSG00000105290	APLP1	unique Mild vs control 21 down		3.90827	3.53627	3.56133		-0.346944	0.786248	0.0646138	0.0250606	1.01752	0.806094	-0.361838	0.778172	0.0708894		Olink METABOLISM(v.3403)
P51888	ENSG00000188783	PRELP	shared Severe vs mild/control 226 up		6.32251	6.34664	6.73074		0.404234	1.32339	2.31408e-07	0.381158	1.30239	1.72238e-06	0.0241337	1.01687	0.837779		Olink CARDIOVASCULAR II(v.5004)
P52564	ENSG00000108984	MAP2K6	unique Severe vs control 51 down		1.94334	1.69954	1.56999		-0.3976	0.75912	0.0144855	-0.129549	0.914117	0.434529	-0.243798	0.844519	0.227374		Olink CELL REGULATION(v.3702)
P55285	ENSG00000113361	CDH6	shared vs. Control 56 down		2.80919	2.28824	2.05612		-0.751506	0.593983	4.32843e-08	-0.232117	0.851384	0.114092	-0.520381	0.697188	0.000941508		Olink NEUROLOGY(v.8012)
P55773	ENSG00000274736	CCL23	shared Severe vs mild/control 226 up		7.23022	7.57656	8.92079		1.68345	3.21195	6.43375e-16	1.3381	2.52818	6.23986e-11	0.346333	1.27132	0.146457		Olink INFLAMMATION(v.3021)
P55774	ENSG00000275385	CCL18	unique Severe vs control 39 up		4.16308	4.55915	4.78466		0.613159	1.52961	0.0176774	0.225513	1.16919	0.459875	0.396074	1.31592	0.235069		Olink CARDIOMETABOLIC(v.3603)
P56470	ENSG00000171747	LGALS4	shared Severe vs mild/control 226 up		2.04965	2.10159	2.54206		0.496179	1.41047	0.000126304	0.442402	1.35887	0.000894661	0.0519408	1.03666	0.786173		Olink CARDIOVASCULAR III(v.6112)
P59665	ENSG00000206047	DEFA1	shared Severe vs mild/control 226 up		-0.33466	-0.42668	0.0454091		0.382874	1.30394	6.7201e-05	0.473388	1.38837	1.71137e-06	-0.0920196	0.938208	0.473677		Olink CARDIOMETABOLIC(v.3603)
P78310	ENSG00000154639	CXADR	shared Severe vs mild/control 226 up		0.701788	0.799773	1.36861		0.689489	1.61271	4.7582e-07	0.584248	1.49926	2.68106e-05	0.0979858	1.07028	0.56832		Olink IMMUNE RESPONSE(v.3204)
P78333	ENSG00000179399	GPC5	unique Severe vs mild 10 down		2.76218	2.85004	2.46664		-0.295534	0.814771	0.0138601	-0.383445	0.766605	0.00190509	0.0878672	1.0628	0.592023		Olink NEUROLOGY(v.8012)
P78362	ENSG00000135250	SRPK2	shared vs. Control 56 down		-0.317692	-0.68818	-0.796007		-0.488872	0.712582	0.000495982	-0.107827	0.927985	0.479853	-0.373276	0.772027	0.0260407		Olink IMMUNE RESPONSE(v.3204)
P78380	ENSG00000173391	OLR1	shared vs. Control 56 down		6.73218	5.90521	6.24812		-0.481945	0.716012	0.0361425	0.342909	1.26831	0.167971	-0.826667	0.56383	0.00192163		Olink CARDIOVASCULAR II(v.5004)
P78410	ENSG00000186470	BTN3A2	shared Severe vs mild/control 226 up		0.469552	0.776564	1.5494		1.08328	2.11884	3.22327e-15	0.77456	1.71067	6.91222e-09	0.307012	1.23714	0.0442897		Olink IMMUNE RESPONSE(v.3204)
P78560	ENSG00000169372	CRADD	Shared all 22 down		3.7977	3.17982	2.6343		-1.19153	0.437838	1.23972e-05	-0.564372	0.67625	0.0498527	-0.62716	0.64745	0.0541654		Olink NEURO EXPLORATORY(v.3911)
P80075	ENSG00000108700	CCL8	shared vs. Control 16 up		6.65866	7.27307	7.53253		0.829339	1.77687	0.0004189	0.259456	1.19703	0.402133	0.602526	1.51837	0.0322818		Olink INFLAMMATION(v.3021)
P80162	ENSG00000124875	CXCL6	unique Mild vs control 5 up		5.31391	5.69835	5.61054		0.296628	1.22827	0.140229	-0.0878147	0.940947	0.562641	0.373687	1.29566	0.0684619		Olink INFLAMMATION(v.3021)
P80303	ENSG00000070081	NUCB2	shared Severe vs mild/control 226 up		2.02043	2.30543	3.1919		1.1524	2.22283	2.81012e-08	0.871671	1.82978	3.2063e-05	0.285004	1.21841	0.285661		Olink ORGAN DAMAGE(v.3311)
P80370	ENSG00000185559	DLK1	shared Severe vs mild/control 40 down		4.06829	3.79308	3.18314		-0.885932	0.541138	5.15387e-06	-0.612105	0.654241	0.00210125	-0.275207	0.826331	0.269599		Olink CARDIOVASCULAR III(v.6112)
P98160	ENSG00000142798	HSPG2	unique Severe vs mild 33 up		6.23785	6.11442	6.44732		0.209473	1.15627	0.157802	0.335182	1.26154	0.0318861	-0.12343	0.918003	0.549505		Olink CARDIOVASCULAR III(v.6112)
PPP1R9B	ENSG00000108819	PPP1R9B	shared vs. Control 56 down		2.6643	1.818	1.56486		-1.14347	0.452669	0.000285558	-0.253134	0.839072	0.434529	-0.859144	0.55128	0.0222418		Olink IMMUNE RESPONSE(v.3204)
Q00978	ENSG00000213928	IRF9	unique Severe vs control 51 down		1.49107	1.22759	1.08147		-0.417447	0.748749	0.00699783	-0.146123	0.903676	0.392894	-0.263482	0.833075	0.169816		Olink IMMUNE RESPONSE(v.3204)
Q01543	ENSG00000151702	FLI1	shared Severe vs mild/control 40 down		0.89104	0.629431	0.262236		-0.63289	0.644883	0.000672587	-0.36981	0.773884	0.0628343	-0.261608	0.834157	0.273552		Olink CELL REGULATION(v.3702)
Q02246	ENSG00000184144	CNTN2	unique Severe vs control 51 down		2.50897	2.3413	2.12163		-0.387079	0.764676	0.00474087	-0.219668	0.858763	0.142343	-0.167675	0.890276	0.347862		Olink ORGAN DAMAGE(v.3311)
Q02742	ENSG00000187210	GCNT1	unique Severe vs control 39 up		1.5497	1.67635	1.94283		0.396749	1.31654	0.000124077	0.266472	1.20286	0.0125503	0.126658	1.09176	0.339759		Olink CELL REGULATION(v.3702)
Q02790	ENSG00000004478	FKBP4	shared Severe vs mild/control 226 up		0.425767	0.539373	1.25366		0.823137	1.76925	3.11236e-08	0.712263	1.63837	2.36411e-06	0.113607	1.08193	0.578507		Olink METABOLISM(v.3403)
Q03403	ENSG00000160181	TFF2	shared Severe vs mild/control 226 up		3.22269	3.06243	3.86723		0.674049	1.59554	0.000745179	0.824454	1.77086	6.1533e-05	-0.160259	0.894865	0.58285		Olink METABOLISM(v.3403)
Q04759	ENSG00000065675	PRKCQ	unique Mild vs control 21 down		-0.87724	-1.21145	-1.1352		-0.257956	0.836272	0.0242426	0.0762579	1.05428	0.713903	-0.340586	0.78972	0.0233637		Olink IMMUNE RESPONSE(v.3204)
Q04760	ENSG00000124767	GLO1	unique Severe vs control 51 down		5.78274	5.46312	5.20596		-0.603711	0.658059	0.016702	-0.257163	0.836732	0.338351	-0.319622	0.80128	0.314318		Olink CARDIOVASCULAR II(v.5004)
Q04900	ENSG00000135535	CD164	unique Severe vs control 39 up		1.8731	1.98836	2.26727		0.402046	1.32138	5.96205e-05	0.278908	1.21328	0.00606411	0.115269	1.08318	0.366056		Olink METABOLISM(v.3403)
Q05516	ENSG00000109906	ZBTB16	shared Severe vs mild/control 226 up		1.24704	0.952142	1.80339		0.530498	1.44443	0.00815536	0.83484	1.78366	5.03819e-05	-0.294899	0.815129	0.235268		Olink IMMUNE RESPONSE(v.3204)/Olink CELL REGULATION(v.3702)
Q06323	ENSG00000092010	PSME1	unique Severe vs mild 33 up		3.85601	3.84832	4.20698		0.350978	1.27542	0.06342	0.338331	1.26429	0.0623757	-0.00768625	0.994686	0.940854		Olink NEURO EXPLORATORY(v.3911)
Q06520	ENSG00000105398	SULT2A1	Shared all 72 up		-0.271562	0.133718	1.18848		1.46209	2.75508	6.76858e-16	1.05918	2.08375	1.67221e-09	0.402912	1.32217	0.0449372		Olink CELL REGULATION(v.3702)
Q07654	ENSG00000160180	TFF3	shared Severe vs mild/control 226 up		2.99867	3.1491	3.83326		0.852574	1.80572	2.15338e-05	0.69435	1.61815	0.000751808	0.150433	1.1099	0.562179		Olink CARDIOVASCULAR III(v.6112)
Q07960	ENSG00000175220	ARHGAP1	unique Mild vs control 21 down		2.09847	1.70988	1.85221		-0.246253	0.843083	0.154993	0.142336	1.10369	0.527071	-0.393474	0.761294	0.0669737		Olink CELL REGULATION(v.3702)
Q08629	ENSG00000152377	SPOCK1	shared Severe vs mild/control 226 up		0.272427	0.431387	1.12489		0.839858	1.78987	5.7826e-17	0.684571	1.60722	4.10522e-12	0.15896	1.11648	0.176157		Olink NEUROLOGY(v.8012)
Q08708	ENSG00000167850	CD300C	shared Severe vs mild/control 226 up		4.33953	4.51399	5.2591		0.910748	1.88002	8.2322e-12	0.7382	1.66809	2.83981e-08	0.17446	1.12854	0.295326		Olink NEUROLOGY(v.8012)
Q0Z7S8	ENSG00000205186	FABP9	unique Severe vs control 51 down		0.93174	0.703438	0.53557		-0.387719	0.764337	5.15387e-06	-0.167867	0.890158	0.0712139	-0.228302	0.853639	0.0259707		Olink ORGAN DAMAGE(v.3311)
Q10471	ENSG00000143641	GALNT2	shared Severe vs mild/control 226 up		4.5682	4.69783	5.34755		0.777742	1.71445	2.38339e-10	0.64957	1.5687	1.36709e-07	0.129629	1.09401	0.409136		Olink CELL REGULATION(v.3702)
Q11201	ENSG00000008513	ST3GAL1	Shared all 72 up		2.23793	2.87875	3.95528		1.70414	3.25834	4.9852e-21	1.06847	2.09721	2.3751e-10	0.635667	1.55366	0.000605289		Olink ORGAN DAMAGE(v.3311)
Q12778	ENSG00000150907	FOXO1	shared vs. Control 56 down		1.68719	1.19348	0.788089		-0.935171	0.522981	0.000208314	-0.405387	0.755034	0.11456	-0.504323	0.704991	0.0974009		Olink ORGAN DAMAGE(v.3311)
Q12860	ENSG00000018236	CNTN1	shared vs. Control 56 down		2.11157	1.75931	1.50188		-0.594356	0.66234	1.15676e-09	-0.257432	0.836576	0.0129231	-0.347779	0.785793	0.00167083		Olink CARDIOVASCULAR III(v.6112)
Q12864	ENSG00000079112	CDH17	shared vs. Control 56 down		2.61063	2.0829	1.8076		-0.780119	0.582319	0.000524292	-0.275295	0.826281	0.315415	-0.52356	0.695653	0.0525827		Olink NEURO EXPLORATORY(v.3911)
Q12866	ENSG00000153208	MERTK	Shared all 72 up		3.176	3.65225	4.50765		1.3244	2.50429	1.5591e-19	0.850603	1.80325	7.0604e-10	0.473798	1.38876	0.00191295		Olink CARDIOVASCULAR II(v.5004)
Q12912	ENSG00000118308	LRMP	unique Mild vs control 21 down		2.9305	2.42474	2.8415		-0.0889936	0.940178	0.668146	0.416764	1.33493	0.158425	-0.515858	0.699377	0.0950073		Olink CELL REGULATION(v.3702)
Q12933	ENSG00000127191	TRAF2	shared vs. Control 56 down		0.62574	0.0521333	0.234468		-0.41992	0.747466	0.0211389	0.182335	1.13472	0.439706	-0.582413	0.667846	0.00653411		Olink IMMUNE RESPONSE(v.3204)
Q13043	ENSG00000101109	STK4	Shared all 22 down		3.50205	2.51513	1.32962		-2.1887	0.219349	2.57318e-07	-1.19496	0.4368	0.00604751	-0.99374	0.502174	0.0494509		Olink CARDIOVASCULAR II(v.5004)
Q13105	ENSG00000116809	ZBTB17	shared Severe vs mild/control 226 up		1.75679	1.76559	2.87296		1.09664	2.13856	1.56747e-10	1.09388	2.13447	4.04083e-10	0.00879958	1.00612	0.989619		Olink CELL REGULATION(v.3702)
Q13145	ENSG00000095739	BAMBI	unique Severe vs control 39 up		0.190337	0.274551	0.591593		0.396588	1.31639	0.00976309	0.317042	1.24577	0.0552358	0.0842136	1.06011	0.717599		Olink ORGAN DAMAGE(v.3311)
Q13219	ENSG00000182752	PAPPA	shared Severe vs mild/control 226 up		1.9541	1.7303	2.73197		0.785522	1.72372	9.13015e-07	1.00831	2.01156	1.40787e-09	-0.223807	0.856303	0.273722		Olink CARDIOVASCULAR II(v.5004)
Q13241	ENSG00000134539	KLRD1	Shared all 72 up		4.0067	4.40826	5.04426		1.03569	2.0501	9.35016e-10	0.633341	1.55115	0.000181948	0.40235	1.32166	0.0419935		Olink IMMUNE RESPONSE(v.3204)
Q13261	ENSG00000134470	IL15RA	unique Severe vs control 39 up		0.224881	0.39338	0.602302		0.362554	1.2857	0.0126744	0.208922	1.15582	0.217833	0.168499	1.12389	0.384744		Olink INFLAMMATION(v.3021)
Q13308	ENSG00000112655	PTK7	unique Severe vs control 39 up		0.297429	0.455107	0.687082		0.397198	1.31695	0.0159721	0.231975	1.17444	0.194785	0.157677	1.11549	0.455505		Olink ORGAN DAMAGE(v.3311)
Q13451	ENSG00000096060	FKBP5	shared Severe vs mild/control 226 up		3.61938	3.52684	5.55815		1.88967	3.7055	7.4285e-08	1.99816	3.99489	3.01216e-08	-0.0925478	0.937865	0.832486		Olink NEURO EXPLORATORY(v.3911)
Q13541	ENSG00000187840	EIF4EBP1	unique Severe vs control 51 down		7.66131	7.53135	7.13029		-0.583173	0.667494	0.0797648	-0.401053	0.757305	0.226149	-0.129966	0.913853	0.770115		Olink INFLAMMATION(v.3021)
Q14005	ENSG00000172349	IL16	shared vs. Control 56 down		4.99944	4.43449	4.26638		-0.742992	0.597499	0.00266661	-0.168114	0.890006	0.551533	-0.567283	0.674887	0.0575993		Olink CARDIOVASCULAR II(v.5004)
Q14203	ENSG00000204843	DCTN1	shared vs. Control 56 down		2.85573	2.2168	2.2143		-0.666564	0.630005	0.00380226	-0.00250672	0.998264	0.952799	-0.64631	0.638913	0.0188133		Olink IMMUNE RESPONSE(v.3204)
Q14213	ENSG00000105246	EBI3	Shared all 72 up		4.41966	4.93372	5.86958		1.46289	2.7566	6.82382e-21	0.946029	1.92656	9.06316e-11	0.516862	1.43084	0.0012039		Olink CARDIOVASCULAR II(v.5004)
Q14393	ENSG00000183087	GAS6	shared Severe vs mild/control 226 up		2.36586	2.48474	2.94743		0.584545	1.49957	4.12255e-08	0.464232	1.37958	1.68513e-05	0.118875	1.08589	0.378749		Olink CARDIOMETABOLIC(v.3603)
Q14515	ENSG00000152583	SPARCL1	shared Severe vs mild/control 226 up		1.34768	1.24842	1.84438		0.504839	1.41897	4.34422e-07	0.601344	1.51713	6.16419e-09	-0.099259	0.933512	0.457293		Olink CARDIOMETABOLIC(v.3603)
Q14767	ENSG00000119681	LTBP2	unique Severe vs mild 33 up		0.848137	0.7257	1.07518		0.227047	1.17044	0.0302482	0.351866	1.27621	0.00123421	-0.122438	0.918634	0.376395		Olink CARDIOMETABOLIC(v.3603)
Q14790	ENSG00000064012	CASP8	unique Severe vs control 51 down		1.84256	1.59082	1.3463		-0.518115	0.698284	0.0118636	-0.244511	0.844102	0.258477	-0.251749	0.839878	0.330001		Olink INFLAMMATION(v.3021)
Q14956	ENSG00000136235	GPNMB	unique Severe vs control 51 down		5.85016	5.58751	5.42529		-0.417622	0.748658	1.9553e-05	-0.162218	0.89365	0.139024	-0.262645	0.833558	0.0245775		Olink NEURO EXPLORATORY(v.3911)
Q15109	ENSG00000204305	AGER	shared Severe vs mild/control 226 up		10.843	11.0398	12.1213		1.2936	2.4514	2.41042e-11	1.09242	2.13232	1.92131e-08	0.196852	1.14619	0.408604		Olink CARDIOVASCULAR II(v.5004)
Q15126	ENSG00000163344	PMVK	shared vs. Control 56 down		2.42109	1.5782	1.16904		-1.29236	0.408282	2.72412e-05	-0.409152	0.753066	0.196415	-0.856	0.552482	0.0190677		Olink NEURO EXPLORATORY(v.3911)
Q15155	ENSG00000103512	NOMO1	shared Severe vs mild/control 226 up		3.05241	3.33997	3.92868		0.878407	1.83834	2.0843e-15	0.590139	1.50539	3.42073e-08	0.287557	1.22057	0.0188133		Olink METABOLISM(v.3403)
Q15165	ENSG00000105854	PON2	shared Severe vs mild/control 226 up		-0.29765	-0.127242	0.425459		0.698111	1.62238	5.55134e-07	0.535265	1.44921	0.000161034	0.170408	1.12538	0.366056		Olink ORGAN DAMAGE(v.3311)
Q15166	ENSG00000105852	PON3	shared Severe vs mild/control 40 down		3.61874	3.29666	2.63048		-0.963673	0.51275	2.46428e-09	-0.648683	0.637862	6.20151e-05	-0.322088	0.799911	0.0981594		Olink CARDIOVASCULAR III(v.6112)
Q15389	ENSG00000154188	ANGPT1	unique Severe vs mild 10 down		6.58466	6.99531	6.53949		-0.045172	0.969174	0.772556	-0.479511	0.717221	0.0722989	0.410653	1.32929	0.208701		Olink CARDIOVASCULAR II(v.5004)
Q15517	ENSG00000137197	CDSN	unique Severe vs mild 33 up		1.54238	1.25511	1.81526		0.27288	1.20822	0.130226	0.572814	1.48742	0.00334442	-0.287277	0.819447	0.247522		Olink IMMUNE RESPONSE(v.3204)
Q15582	ENSG00000120708	TGFBI	shared Severe vs mild/control 226 up		6.36051	6.44396	6.86869		0.503755	1.4179	3.41415e-07	0.422128	1.3399	2.6041e-05	0.0834451	1.05955	0.532524		Olink CARDIOMETABOLIC(v.3603)
Q16270	ENSG00000163453	IGFBP7	shared Severe vs mild/control 226 up		5.30098	5.37789	5.74886		0.455219	1.37099	0.000218135	0.374353	1.29626	0.00324829	0.0769163	1.05476	0.647004		Olink CARDIOVASCULAR III(v.6112)
Q16627	ENSG00000276409	CCL14	shared vs. Control 16 up		4.31149	4.64898	4.76283		0.44545	1.36174	0.00444255	0.11385	1.08211	0.559873	0.336953	1.26309	0.0764239		Olink CARDIOMETABOLIC(v.3603)
Q16698	ENSG00000104325	DECR1	unique Mild vs control 21 down		4.25084	3.27504	3.69552		-0.555326	0.680503	0.120722	0.420478	1.33837	0.386056	-0.994133	0.502037	0.0311038		Olink CARDIOVASCULAR II(v.5004)
Q16719	ENSG00000115919	KYNU	shared Severe vs mild/control 226 up		6.65395	6.83951	7.76963		1.1019	2.14637	2.73711e-08	0.921532	1.89413	4.39757e-06	0.185563	1.13726	0.484875		Olink NEUROLOGY(v.8012)
Q16775	ENSG00000063854	HAGH	unique Severe vs control 51 down		5.38833	5.28537	4.85474		-0.591128	0.663824	0.0639955	-0.430626	0.74194	0.171696	-0.102958	0.931122	0.797578		Olink NEUROLOGY(v.8012)
Q6EIG7	ENSG00000205846	CLEC6A	shared Severe vs mild/control 226 up		0.257498	0.335536	0.66713		0.405571	1.32461	0.00309439	0.328767	1.25594	0.0230215	0.0780376	1.05558	0.714572		Olink IMMUNE RESPONSE(v.3204)
Q6NW40	ENSG00000174136	RGMB	unique Severe vs control 51 down		3.91032	3.72039	3.48388		-0.41682	0.749074	0.000321044	-0.236505	0.848799	0.0626395	-0.189936	0.876644	0.205683		Olink NEUROLOGY(v.8012)
Q6UWV6	ENSG00000182156	ENPP7	shared Severe vs mild/control 226 up		2.02648	2.12408	3.43729		1.40404	2.64642	1.50184e-09	1.30681	2.47394	3.01216e-08	0.0975967	1.06999	0.777163		Olink METABOLISM(v.3403)
Q6UX15	ENSG00000204381	LAYN	shared Severe vs mild/control 226 up		3.18063	3.32224	4.01255		0.835784	1.78483	5.41815e-05	0.69167	1.61515	0.00113518	0.141602	1.10313	0.617128		Olink NEUROLOGY(v.8012)
Q6UX27	ENSG00000189068	VSTM1	shared Severe vs mild/control 226 up		0.187835	0.241149	0.67203		0.48074	1.39546	3.53656e-05	0.42799	1.34536	0.000326802	0.0533135	1.03765	0.765724		Olink NEURO EXPLORATORY(v.3911)
Q6ZUJ8	ENSG00000155629	PIK3AP1	unique Severe vs control 51 down		2.9625	2.57377	2.30684		-0.672564	0.627391	0.00605656	-0.266935	0.831083	0.317677	-0.388731	0.763801	0.205683		Olink IMMUNE RESPONSE(v.3204)
Q76M96	ENSG00000091986	CCDC80	shared Severe vs mild/control 226 up		3.67783	3.64669	4.37177		0.706204	1.63151	6.28871e-06	0.734113	1.66337	4.49126e-06	-0.0311381	0.978648	0.900563		Olink METABOLISM(v.3403)
Q7Z5A7	ENSG00000219438	FAM19A5	unique Severe vs control 51 down		-0.111492	-0.16646	-0.452402		-0.331584	0.794664	0.0534135	-0.285942	0.820206	0.126412	-0.0549683	0.962616	0.840147		Olink CELL REGULATION(v.3702)
Q7Z5R6	ENSG00000077420	APBB1IP	unique Severe vs control 51 down		4.2334	4.08716	3.90283		-0.33185	0.794517	0.00220879	-0.184337	0.880053	0.114793	-0.146231	0.903608	0.29728		Olink CELL REGULATION(v.3702)
Q7Z6M3	ENSG00000271605	MILR1	shared Severe vs mild/control 226 up		1.01822	1.0839	1.50249		0.488453	1.40294	9.60718e-06	0.421454	1.33928	0.00018454	0.0656749	1.04657	0.678409		Olink IMMUNE RESPONSE(v.3204)
Q86SR1	ENSG00000164574	GALNT10	shared Severe vs mild/control 226 up		1.06585	1.26446	1.69961		0.63187	1.54957	7.98151e-10	0.434107	1.35107	2.3962e-05	0.19861	1.14759	0.101554		Olink ORGAN DAMAGE(v.3311)
Q86VB7	ENSG00000177575	CD163	shared Severe vs mild/control 226 up		5.9032	5.95504	6.50545		0.606657	1.52273	1.1849e-05	0.553918	1.46807	9.01309e-05	0.0518314	1.03658	0.797578		Olink CARDIOVASCULAR III(v.6112)
Q86VZ4	ENSG00000120256	LRP11	unique Severe vs control 39 up		1.95759	2.11867	2.38803		0.4391	1.35576	0.000102658	0.269361	1.20527	0.0202344	0.161077	1.11812	0.256325		Olink METABOLISM(v.3403)
Q86WD7	ENSG00000170054	SERPINA9	unique Severe vs control 51 down		1.31134	1.05811	0.865891		-0.433543	0.740441	0.0123313	-0.192216	0.87526	0.347919	-0.253231	0.839015	0.262638		Olink ORGAN DAMAGE(v.3311)
Q8IUN9	ENSG00000132514	CLEC10A	shared Severe vs mild/control 40 down		2.59421	2.36438	1.84044		-0.759736	0.590604	1.33294e-06	-0.53	0.692555	0.000940813	-0.229832	0.852734	0.248658		Olink NEUROLOGY(v.8012)
Q8IW75	ENSG00000165953	SERPINA12	unique Severe vs control 39 up		1.68191	2.19779	2.78323		1.09116	2.13046	0.0361425	0.585447	1.5005	0.3226	0.515876	1.42986	0.455904		Olink CARDIOVASCULAR II(v.5004)
Q8IX05	ENSG00000241399	CD302	shared Severe vs mild/control 226 up		4.57004	4.80198	5.32415		0.753032	1.68533	2.94913e-05	0.519641	1.4336	0.00524696	0.231942	1.17442	0.314318		Olink NEURO EXPLORATORY(v.3911)
Q8IYS5	ENSG00000170909	OSCAR	unique Severe vs control 39 up		9.23688	9.54017	9.81529		0.577991	1.49277	3.49694e-06	0.27512	1.21009	0.0351913	0.303285	1.23395	0.0415199		Olink CARDIOVASCULAR II(v.5004)
Q8N1Q1	ENSG00000185015	CA13	shared vs. Control 56 down		1.47201	0.824069	0.930627		-0.581785	0.668137	0.0122729	0.106558	1.07666	0.792664	-0.659404	0.63314	0.0172763		Olink METABOLISM(v.3403)
Q8N423	ENSG00000131042	LILRB2	shared Severe vs mild/control 226 up		1.8855	2.08013	2.53397		0.638784	1.55702	5.86401e-10	0.4477	1.36386	1.41718e-05	0.194629	1.14443	0.118456		Olink CARDIOMETABOLIC(v.3603)
Q8N474	ENSG00000104332	SFRP1	shared Severe vs mild/control 226 up		3.96889	4.58527	7.519		3.54918	11.706	9.25894e-19	2.9356	7.65076	9.2177e-14	0.616375	1.53302	0.174327		Olink NEURO EXPLORATORY(v.3911)
Q8N8S7	ENSG00000154380	ENAH	shared Severe vs mild/control 226 up		1.23253	1.20746	1.84223		0.598988	1.51465	3.09566e-08	0.627252	1.54462	1.65348e-08	-0.0250628	0.982778	0.854178		Olink ORGAN DAMAGE(v.3311)
Q8NBI3	ENSG00000162490	DRAXIN	shared Severe vs mild/control 226 up		1.14996	1.03457	1.51382		0.388504	1.30903	0.00584356	0.495953	1.41025	0.000650862	-0.115392	0.923132	0.577122		Olink NEUROLOGY(v.8012)
Q8NBJ7	ENSG00000129103	SUMF2	shared vs. Control 56 down		1.69155	1.18569	1.34315		-0.348144	0.785594	0.0129504	0.157459	1.11532	0.325334	-0.50436	0.704973	0.00192163		Olink METABOLISM(v.3403)
Q8NBP7	ENSG00000169174	PCSK9	shared Severe vs mild/control 226 up		1.21237	1.44164	2.03028		0.828234	1.77551	1.72534e-18	0.596416	1.51196	4.84678e-11	0.229276	1.17225	0.0222418		Olink CARDIOVASCULAR III(v.6112)
Q8NBS9	ENSG00000239264	TXNDC5	shared Severe vs mild/control 226 up		0.692538	0.946593	1.35482		0.671823	1.59308	0.000114371	0.413494	1.33191	0.0237148	0.254056	1.19256	0.245357		Olink METABOLISM(v.3403)
Q8NC01	ENSG00000150048	CLEC1A	shared Severe vs mild/control 226 up		1.75535	1.85384	2.25864		0.500055	1.41427	0.000180213	0.400866	1.3203	0.00365252	0.0984903	1.07065	0.587519		Olink ORGAN DAMAGE(v.3311)
Q8NEV9	ENSG00000197272	IL27	Shared all 72 up		4.41966	4.93372	5.86958		1.46289	2.7566	6.82382e-21	0.946029	1.92656	9.06316e-11	0.516862	1.43084	0.0012039		Olink CARDIOVASCULAR II(v.5004)
Q8NFP4	ENSG00000112139	MDGA1	unique Severe vs control 51 down		1.96768	1.65471	1.46847		-0.487523	0.713249	0.00100112	-0.186243	0.878892	0.289544	-0.31297	0.804983	0.0852612		Olink NEUROLOGY(v.8012)
Q8NHL6	ENSG00000104972	LILRB1	shared Severe vs mild/control 226 up		0.835129	0.923896	1.29411		0.450631	1.36664	2.62066e-07	0.364867	1.28776	3.99557e-05	0.0887664	1.06346	0.450656		Olink CARDIOMETABOLIC(v.3603)
Q8NI22	ENSG00000180398	MCFD2	shared Severe vs mild/control 226 up		1.6109	1.85088	2.70716		1.09336	2.1337	4.8502e-18	0.854307	1.80789	3.96308e-12	0.239984	1.18098	0.0853907		Olink METABOLISM(v.3403)
Q8TCT1	ENSG00000173868	PHOSPHO1	shared Severe vs mild/control 226 up		1.54102	1.41884	2.22803		0.685874	1.60868	1.06585e-06	0.808377	1.75124	2.58756e-08	-0.122185	0.918795	0.510304		Olink NEURO EXPLORATORY(v.3911)
Q8TD06	ENSG00000173467	AGR3	shared Severe vs mild/control 226 up		0.813608	0.997084	1.5397		0.713345	1.6396	0.000263174	0.534007	1.44795	0.00870451	0.183476	1.13562	0.491063		Olink CELL REGULATION(v.3702)
Q8TDQ1	ENSG00000186074	CD300LF	shared Severe vs mild/control 226 up		4.14367	4.48139	5.38135		1.22623	2.33955	9.82873e-07	0.890276	1.85353	0.000487075	0.337712	1.26375	0.295326		Olink NEUROLOGY(v.8012)
Q8WTU2	ENSG00000146700	SSC4D	shared Severe vs mild/control 40 down		1.51344	1.40299	0.647818		-0.900595	0.535666	0.00039224	-0.785123	0.580303	0.00281129	-0.110453	0.926297	0.765724		Olink METABOLISM(v.3403)
Q8WVQ1	ENSG00000171302	CANT1	unique Severe vs control 39 up		2.87295	3.11937	3.34206		0.468411	1.38358	2.01666e-08	0.222695	1.16691	0.00906415	0.246413	1.18625	0.0117306		Olink METABOLISM(v.3403)
Q8WXI8	ENSG00000166527	CLEC4D	shared Severe vs mild/control 226 up		1.91361	1.70827	2.49177		0.588095	1.50326	0.000369267	0.78922	1.72814	3.74067e-06	-0.205335	0.867337	0.349901		Olink IMMUNE RESPONSE(v.3204)
Q8WYN0	ENSG00000101844	ATG4A	unique Severe vs control 51 down		3.18253	2.8629	2.57729		-0.647134	0.638548	0.0123313	-0.285607	0.820396	0.27991	-0.319634	0.801273	0.317571		Olink CELL REGULATION(v.3702)
Q92520	ENSG00000196937	FAM3C	shared Severe vs mild/control 226 up		3.7013	3.79636	4.28278		0.601227	1.51701	0.00300724	0.498149	1.4124	0.0195164	0.0950622	1.06811	0.73989		Olink METABOLISM(v.3403)
Q92558	ENSG00000112290	WASF1	shared vs. Control 56 down		0.726592	0.226169	0.26985		-0.481589	0.716188	0.0118636	0.0436811	1.03074	0.920095	-0.507578	0.703403	0.0260407		Olink CELL REGULATION(v.3702)
Q92583	ENSG00000102970	CCL17	shared Severe vs mild/control 40 down		5.52783	5.47268	5.06499		-0.46921	0.72236	0.0329734	-0.414605	0.750225	0.0771714	-0.0551449	0.962498	0.865894		Olink CARDIOVASCULAR II(v.5004)
Q92844	ENSG00000136560	TANK	shared vs. Control 56 down		1.4034	0.53722	0.0897227		-1.33073	0.397566	2.80192e-05	-0.447497	0.733314	0.186628	-0.870912	0.546801	0.0207938		Olink IMMUNE RESPONSE(v.3204)
Q92956	ENSG00000157873	TNFRSF14	shared Severe vs mild/control 226 up		2.75481	2.93861	3.59228		0.837659	1.78715	4.87272e-08	0.652166	1.57153	2.68106e-05	0.183803	1.13587	0.345336		Olink CARDIOVASCULAR III(v.6112)
Q92982	ENSG00000131669	NINJ1	shared vs. Control 56 down		1.82452	1.27157	1.1273		-0.70349	0.614085	1.30768e-05	-0.144269	0.904838	0.423833	-0.555265	0.680532	0.00306272		Olink CELL REGULATION(v.3702)
Q96B36	ENSG00000204673	AKT1S1	shared vs. Control 56 down		2.16804	1.66748	1.49987		-0.704123	0.613815	0.00272769	-0.167612	0.890315	0.484516	-0.512352	0.701078	0.0719881		Olink NEURO EXPLORATORY(v.3911)
Q96EK5	ENSG00000198954	KIF1BP	unique Severe vs control 51 down		1.48345	1.13306	0.865739		-0.647661	0.638314	0.0073665	-0.267317	0.830863	0.290954	-0.350394	0.78437	0.242791		Olink NEURO EXPLORATORY(v.3911)
Q96GP6	ENSG00000244486	SCARF2	unique Mild vs control 21 down		4.09342	3.76296	3.89662		-0.196805	0.872481	0.184817	0.133663	1.09708	0.402133	-0.328903	0.796142	0.051395		Olink NEUROLOGY(v.8012)
Q96H15	ENSG00000145850	TIMD4	shared Severe vs mild/control 226 up		2.58358	2.6122	3.10139		0.51759	1.43156	0.000586026	0.488497	1.40298	0.00167272	0.0286211	1.02004	0.899723		Olink CARDIOMETABOLIC(v.3603)
Q96I82	ENSG00000107821	KAZALD1	unique Severe vs control 51 down		2.26908	2.07757	1.792		-0.477236	0.718353	0.000249387	-0.285578	0.820413	0.0377664	-0.191508	0.87569	0.253229		Olink CELL REGULATION(v.3702)
Q96IQ7	ENSG00000019102	VSIG2	shared Severe vs mild/control 226 up		1.78832	1.74091	2.2493		0.468026	1.38322	0.00277025	0.511828	1.42586	0.00154845	-0.0474078	0.967673	0.844955		Olink CARDIOVASCULAR II(v.5004)
Q96LA5	ENSG00000132704	FCRL2	unique Severe vs control 39 up		2.57713	2.66483	2.97127		0.399413	1.31897	0.0037865	0.306444	1.23666	0.0351913	0.0876978	1.06267	0.642526		Olink NEUROLOGY(v.8012)
Q96PL1	ENSG00000164265	SCGB3A2	shared vs. Control 16 up		0.356762	0.691409	0.900318		0.57287	1.48748	8.83604e-05	0.208909	1.15581	0.151143	0.344327	1.26956	0.049757		Olink CARDIOVASCULAR III(v.6112)
Q96RT1	ENSG00000112851	ERBIN	shared vs. Control 56 down		0.811187	0.413996	0.387959		-0.457932	0.728029	0.0169775	-0.0260365	0.982115	0.8345	-0.406543	0.754429	0.080811		Olink ORGAN DAMAGE(v.3311)
Q96SM3	ENSG00000088882	CPXM1	unique Severe vs mild 10 down		2.32697	2.73342	2.23957		-0.0873983	0.941219	0.72356	-0.499512	0.707346	0.0537255	0.406447	1.32542	0.190574		Olink CELL REGULATION(v.3702)
Q99426	ENSG00000105254	TBCB	unique Severe vs control 51 down		3.64285	2.82764	2.37469		-1.31725	0.4013	0.00209522	-0.452947	0.730549	0.317937	-0.815206	0.568327	0.110903		Olink NEURO EXPLORATORY(v.3911)
Q99616	ENSG00000181374	CCL13	unique Mild vs control 5 up		11.1081	11.564	11.1493		0.0411583	1.02894	0.93874	-0.431499	0.741491	0.0660871	0.449394	1.36547	0.0908998		Olink INFLAMMATION(v.3021)
Q99969	ENSG00000106538	RARRES2	shared vs. Control 16 up		9.19936	9.55879	9.60795		0.404186	1.32334	0.0157608	0.0491589	1.03466	0.840032	0.360614	1.28397	0.0747838		Olink CARDIOVASCULAR III(v.6112)
Q9BQ51	ENSG00000197646	PDCD1LG2	unique Severe vs control 39 up		1.30793	1.40381	1.65554		0.350089	1.27464	0.000298476	0.251728	1.19063	0.0121198	0.0958821	1.06872	0.4496		Olink CARDIOVASCULAR II(v.5004)
Q9BQB4	ENSG00000167941	SOST	Shared all 72 up		2.72615	3.10663	3.53394		0.806078	1.74845	8.38063e-09	0.42582	1.34334	0.0025866	0.380258	1.30157	0.0194999		Olink METABOLISM(v.3403)
Q9BQR3	ENSG00000172382	PRSS27	shared Severe vs mild/control 40 down		7.12397	7.08138	6.64674		-0.460306	0.726832	0.000247136	-0.4223	0.746234	0.00110109	-0.0425906	0.97091	0.836609		Olink CARDIOVASCULAR II(v.5004)
Q9BTE6	ENSG00000108825	PTGES3L-AARSD1	unique Severe vs control 51 down		1.58321	1.26131	0.976584		-0.645399	0.639316	0.000836363	-0.284723	0.820899	0.139024	-0.321904	0.800013	0.167307		Olink NEURO EXPLORATORY(v.3911)
Q9BUD6	ENSG00000159674	SPON2	Shared all 72 up		7.01351	7.49807	8.0748		1.06178	2.08751	2.09963e-14	0.5771	1.49185	1.62599e-05	0.484683	1.39928	0.0013438		Olink CARDIOVASCULAR II(v.5004)
Q9BXJ1	ENSG00000173918	C1QTNF1	shared Severe vs mild/control 226 up		2.7215	2.89655	3.74961		1.02239	2.03128	1.99445e-10	0.848314	1.8004	1.40325e-07	0.175049	1.129	0.393921		Olink CARDIOMETABOLIC(v.3603)
Q9BXN2	ENSG00000172243	CLEC7A	shared Severe vs mild/control 226 up		0.230292	0.296758	0.940193		0.724976	1.65287	3.74419e-05	0.653281	1.57274	0.000290375	0.0664661	1.04715	0.790761		Olink IMMUNE RESPONSE(v.3204)
Q9BYZ8	ENSG00000134193	REG4	shared Severe vs mild/control 226 up		5.88386	6.01816	6.51809		0.643565	1.56218	0.000549884	0.50541	1.41953	0.00920038	0.134293	1.09755	0.58926		Olink METABOLISM(v.3403)
Q9BZM5	ENSG00000131015	ULBP2	shared Severe vs mild/control 226 up		1.31358	1.53872	2.19568		0.889395	1.8524	7.95046e-08	0.661983	1.58226	7.89631e-05	0.225141	1.16889	0.280682		Olink NEUROLOGY(v.8012)
Q9BZW8	ENSG00000122223	CD244	unique Severe vs control 51 down		5.30117	5.07925	4.78885		-0.533227	0.691007	2.05885e-06	-0.290399	0.817676	0.00816466	-0.221924	0.857421	0.0909113		Olink INFLAMMATION(v.3021)
Q9BZZ2	ENSG00000088827	SIGLEC1	Shared all 72 up		4.13798	4.634	5.57468		1.42729	2.68941	4.10482e-13	0.933716	1.91019	1.23461e-06	0.493576	1.40793	0.0262751		Olink NEUROLOGY(v.8012)
Q9C035	ENSG00000132256	TRIM5	unique Mild vs control 21 down		0.704754	0.365493	0.627627		-0.0771269	0.947944	0.555298	0.262134	1.19925	0.133284	-0.345058	0.787277	0.0584533		Olink IMMUNE RESPONSE(v.3204)
Q9H156	ENSG00000185985	SLITRK2	unique Severe vs mild 33 up		1.80963	1.66131	2.11269		0.303055	1.23375	0.021979	0.453728	1.36957	0.000943088	-0.148322	0.902299	0.39472		Olink CELL REGULATION(v.3702)
Q9H3S3	ENSG00000166682	TMPRSS5	unique Severe vs control 51 down		1.0283	0.827644	0.554575		-0.460875	0.726546	1.3526e-06	-0.273069	0.827557	0.00714504	-0.200653	0.870156	0.0854296		Olink NEUROLOGY(v.8012)
Q9H3U7	ENSG00000112562	SMOC2	unique Mild vs control 5 up		6.01856	6.47092	5.84047		-0.178083	0.883876	0.352636	-0.634192	0.644301	0.000818167	0.453144	1.36902	0.0410841		Olink NEUROLOGY(v.8012)
Q9H4D0	ENSG00000158258	CLSTN2	shared Severe vs mild/control 226 up		1.9568	2.09435	2.91729		0.971761	1.96123	5.19462e-13	0.830931	1.77883	6.5013e-10	0.137551	1.10004	0.398819		Olink METABOLISM(v.3403)
Q9H5V8	ENSG00000163814	CDCP1	shared Severe vs mild/control 226 up		1.53493	1.71754	2.42645		0.879662	1.83994	4.96497e-07	0.701014	1.62565	7.97544e-05	0.182611	1.13494	0.432141		Olink INFLAMMATION(v.3021)
Q9HCB6	ENSG00000262655	SPON1	shared Severe vs mild/control 226 up		1.24444	1.27178	1.63708		0.403775	1.32297	2.24307e-06	0.373356	1.29536	1.79559e-05	0.0273339	1.01913	0.809671		Olink CARDIOVASCULAR III(v.6112)
Q9HCK4	ENSG00000185008	ROBO2	Shared all 22 down		3.24408	2.82148	2.47358		-0.76818	0.587158	1.52039e-12	-0.346857	0.786295	0.00111476	-0.421324	0.746739	0.000462543		Olink NEUROLOGY(v.8012)
Q9HCM2	ENSG00000221866	PLXNA4	shared vs. Control 56 down		1.81585	1.33778	1.19995		-0.634591	0.644123	7.73556e-05	-0.137832	0.908884	0.411541	-0.483396	0.715292	0.0112201		Olink IMMUNE RESPONSE(v.3204)
Q9HCU5	ENSG00000138073	PREB	shared Severe vs mild/control 226 up		0.222469	0.136538	0.606073		0.381775	1.30294	0.000706795	0.467956	1.38315	5.46941e-05	-0.085931	0.942176	0.577122		Olink CELL REGULATION(v.3702)
Q9NP99	ENSG00000124731	TREM1	shared Severe vs mild/control 226 up		0.94276	0.883602	1.66197		0.713185	1.63942	1.81346e-05	0.773625	1.70956	5.75636e-06	-0.0591582	0.959824	0.807699		Olink IMMUNE RESPONSE(v.3204)
Q9NPH0	ENSG00000162836	ACP6	shared Severe vs mild/control 226 up		2.18086	2.24789	2.60449		0.4346	1.35154	0.000108162	0.365074	1.28795	0.00155395	0.0670221	1.04755	0.670985		Olink METABOLISM(v.3403)
Q9NQ25	ENSG00000026751	SLAMF7	Shared all 72 up		1.87455	2.24263	2.57078		0.691056	1.61446	8.51664e-07	0.323518	1.25138	0.0269275	0.367538	1.29015	0.02634		Olink CARDIOVASCULAR II(v.5004)
Q9NQX5	ENSG00000107281	NPDC1	shared Severe vs mild/control 226 up		3.3144	3.42378	3.84638		0.54205	1.45604	0.00461722	0.427303	1.34472	0.0350241	0.109382	1.07877	0.686685		Olink METABOLISM(v.3403)
Q9NR71	ENSG00000188611	ASAH2	unique Severe vs mild 10 down		1.64519	1.9001	1.46357		-0.181621	0.881712	0.465342	-0.435041	0.739673	0.076521	0.254908	1.19326	0.39472		Olink NEUROLOGY(v.8012)
Q9NRA1	ENSG00000145431	PDGFC	unique Severe vs control 39 up		1.67179	1.903	2.06392		0.391	1.3113	2.11666e-05	0.160911	1.11799	0.104926	0.231213	1.17382	0.0359193		Olink ORGAN DAMAGE(v.3311)
Q9NRG1	ENSG00000099256	PRTFDC1	shared vs. Control 56 down		0.891729	0.314767	0.172298		-0.760708	0.590206	0.00153196	-0.142469	0.905967	0.551533	-0.590465	0.664129	0.0412146		Olink NEURO EXPLORATORY(v.3911)
Q9NS15	ENSG00000168056	LTBP3	unique Severe vs control 39 up		1.62567	1.82801	2.12338		0.494804	1.40913	0.0158059	0.295371	1.2272	0.1924	0.20234	1.15056	0.456617		Olink NEURO EXPLORATORY(v.3911)
Q9NWQ8	ENSG00000076641	PAG1	shared Severe vs mild/control 40 down		2.92606	2.83139	2.42962		-0.509837	0.702302	0.00653497	-0.412012	0.751575	0.0378544	-0.0946779	0.936481	0.732796		Olink METABOLISM(v.3403)
Q9NWZ3	ENSG00000198001	IRAK4	shared vs. Control 56 down		1.33459	0.809751	0.498009		-0.847531	0.555735	0.000345112	-0.311742	0.805668	0.223201	-0.528151	0.693443	0.0653743		Olink IMMUNE RESPONSE(v.3204)
Q9NZ53	ENSG00000114631	PODXL2	shared Severe vs mild/control 226 up		6.11458	6.2114	7.24785		1.14724	2.2149	7.0765e-15	1.04765	2.06716	1.65076e-12	0.0968167	1.06941	0.600033		Olink CELL REGULATION(v.3702)
Q9NZQ7	ENSG00000120217	CD274	Shared all 72 up		4.6241	5.04358	6.03229		1.38487	2.61148	2.02497e-15	0.972076	1.96166	9.19666e-09	0.412794	1.33126	0.0325525		Olink INFLAMMATION(v.3021)
Q9P0K1	ENSG00000008277	ADAM22	unique Severe vs control 51 down		2.18767	1.96069	1.64261		-0.536008	0.689677	7.32669e-05	-0.318075	0.802139	0.0272639	-0.22698	0.854422	0.188258		Olink NEUROLOGY(v.8012)
Q9P0M4	ENSG00000124391	IL17C	unique Severe vs control 39 up		0.654913	0.700911	0.993495		0.325251	1.25288	0.0195484	0.292584	1.22483	0.0572693	0.0459986	1.0324	0.832486		Olink INFLAMMATION(v.3021)
Q9P0V8	ENSG00000158714	SLAMF8	shared Severe vs mild/control 226 up		0.172719	0.467209	1.0904		0.918299	1.88989	4.20913e-11	0.623838	1.54097	6.11613e-06	0.29449	1.22645	0.0688455		Olink CELL REGULATION(v.3702)
Q9P126	ENSG00000165682	CLEC1B	shared Severe vs mild/control 226 up		8.57117	8.65292	9.27802		0.66101	1.58119	0.0193591	0.593172	1.50856	0.0472093	0.0817578	1.05831	0.870957		Olink NEUROLOGY(v.8012)
Q9UBT3	ENSG00000104371	DKK4	shared Severe vs mild/control 226 up		0.793575	1.0937	1.5547		0.767245	1.70202	9.17572e-05	0.465187	1.3805	0.0237524	0.300123	1.23125	0.22827		Olink NEUROLOGY(v.8012)
Q9UHF1	ENSG00000172889	EGFL7	unique Severe vs control 39 up		3.69832	3.95136	4.1667		0.440264	1.35685	0.024646	0.215344	1.16098	0.388978	0.253035	1.19171	0.32977		Olink ORGAN DAMAGE(v.3311)
Q9UHL4	ENSG00000176978	DPP7	shared Severe vs mild/control 226 up		1.09711	1.37143	2.12902		1.02446	2.0342	2.02655e-10	0.752611	1.68484	2.91489e-06	0.274325	1.20943	0.162403		Olink METABOLISM(v.3403)
Q9UHV9	ENSG00000143256	PFDN2	shared Severe vs mild/control 226 up		0.465194	0.465927	0.838677		0.362469	1.28562	2.83998e-05	0.365378	1.28822	3.79289e-05	0.000732917	1.00051	0.980063		Olink NEURO EXPLORATORY(v.3911)
Q9UHX3	ENSG00000127507	ADGRE2	unique Severe vs control 39 up		2.95202	3.04269	3.33533		0.379479	1.30087	0.00364189	0.292632	1.22487	0.0361951	0.0906725	1.06487	0.625401		Olink METABOLISM(v.3403)
Q9UJM8	ENSG00000101323	HAO1	shared Severe vs mild/control 226 up		3.58921	4.20494	6.38658		2.8307	7.1142	3.58488e-12	2.21	4.62676	4.60296e-08	0.61573	1.53233	0.208542		Olink CARDIOVASCULAR II(v.5004)
Q9UK05	ENSG00000263761	GDF2	Shared all 22 down		5.83537	5.452	4.85647		-0.972979	0.509453	1.50455e-10	-0.591757	0.663534	8.62797e-05	-0.381222	0.767787	0.0299732		Olink CARDIOVASCULAR II(v.5004)
Q9UK53	ENSG00000153487	ING1	unique Mild vs control 21 down		-0.0824771	-0.418953	-0.280598		-0.198121	0.871685	0.152337	0.138356	1.10065	0.452805	-0.341602	0.789164	0.0513513		Olink NEURO EXPLORATORY(v.3911)
Q9UKJ0	ENSG00000121716	PILRB	Shared all 72 up		2.59933	3.00002	3.7056		1.09713	2.13929	1.12852e-09	0.698373	1.62267	0.000105796	0.398756	1.31837	0.0584533		Olink METABOLISM(v.3403)
Q9UKS7	ENSG00000030419	IKZF2	shared vs. Control 56 down		0.00683958	-0.323122	-0.515648		-0.538884	0.688303	6.7201e-05	-0.192526	0.875073	0.163827	-0.333776	0.793457	0.0397341		Olink NEURO EXPLORATORY(v.3911)
Q9ULL4	ENSG00000198753	PLXNB3	unique Severe vs mild 33 up		2.3838	2.33105	2.68754		0.303738	1.23434	0.00206574	0.344748	1.26993	0.000319489	-0.052749	0.964098	0.667859		Olink NEUROLOGY(v.8012)
Q9ULX7	ENSG00000118298	CA14	shared vs. Control 56 down		7.00311	6.52369	6.4998		-0.479398	0.717277	0.0021479	-0.0238888	0.983578	0.974881	-0.472665	0.720632	0.0112201		Olink ORGAN DAMAGE(v.3311)
Q9UNE0	ENSG00000135960	EDAR	unique Severe vs control 51 down		0.569006	0.376458	0.194886		-0.375665	0.77075	0.0280161	-0.181571	0.881742	0.338759	-0.192548	0.875059	0.393921		Olink IMMUNE RESPONSE(v.3204)
Q9UNK0	ENSG00000170310	STX8	shared vs. Control 56 down		1.73664	1.38911	1.22737		-0.53374	0.690762	0.00145252	-0.161745	0.893943	0.345463	-0.353766	0.782539	0.0822478		Olink ORGAN DAMAGE(v.3311)
Q9UQQ2	ENSG00000111252	SH2B3	shared vs. Control 56 down		2.60719	1.89424	1.77273		-0.885562	0.541277	0.00188885	-0.12151	0.919225	0.639571	-0.727406	0.603989	0.0325525		Olink IMMUNE RESPONSE(v.3204)
Q9UQV4	ENSG00000078081	LAMP3	Shared all 72 up		2.70425	3.39241	4.4769		1.76511	3.399	3.33834e-17	1.07891	2.11244	5.65953e-08	0.686201	1.60904	0.00194729		Olink IMMUNE RESPONSE(v.3204)
Q9Y275	ENSG00000102524	TNFSF13B	unique Severe vs control 39 up		5.16855	5.36482	5.61932		0.445942	1.3622	0.00266661	0.254507	1.19293	0.118414	0.19627	1.14573	0.314318		Olink CARDIOVASCULAR III(v.6112)
Q9Y2W6	ENSG00000182134	TDRKH	shared vs. Control 56 down		1.91126	1.58408	1.55314		-0.376969	0.770054	0.00785158	-0.0309414	0.978781	0.80521	-0.332504	0.794157	0.0513513		Olink CELL REGULATION(v.3702)
Q9Y336	ENSG00000129450	SIGLEC9	shared Severe vs mild/control 226 up		3.8274	3.85724	4.21375		0.373155	1.29518	0.000169711	0.346879	1.27181	0.000685568	0.0298376	1.0209	0.854178		Olink NEUROLOGY(v.8012)
Q9Y4K4	ENSG00000012983	MAP4K5	shared vs. Control 56 down		3.30805	2.28704	2.12041		-1.25555	0.418833	0.000717918	-0.166626	0.890924	0.629676	-1.04287	0.485361	0.0188133		Olink ORGAN DAMAGE(v.3311)
Q9Y4X3	ENSG00000213927	CCL27	shared vs. Control 16 up		2.38794	2.75197	2.74052		0.35101	1.27545	0.0380485	-0.0114507	0.992094	0.960007	0.362993	1.28609	0.0747838		Olink NEURO EXPLORATORY(v.3911)
Q9Y5A7	ENSG00000013374	NUB1	unique Severe vs control 51 down		2.11019	1.76116	1.46816		-0.660147	0.632814	0.00205319	-0.293005	0.8162	0.195896	-0.349023	0.785115	0.188011		Olink ORGAN DAMAGE(v.3311)
Q9Y5C1	ENSG00000132855	ANGPTL3	unique Severe vs control 39 up		3.37881	3.56707	3.78437		0.410952	1.32956	0.000670789	0.217293	1.16255	0.0904787	0.188263	1.13939	0.217224		Olink CARDIOMETABOLIC(v.3603)
Q9Y5K6	ENSG00000198087	CD2AP	shared vs. Control 56 down		4.41935	3.91194	3.57798		-0.893729	0.538221	0.000648929	-0.333954	0.793359	0.199403	-0.523007	0.69592	0.0989759		Olink METABOLISM(v.3403)
Q9Y653	ENSG00000205336	ADGRG1	shared Severe vs mild/control 226 up		0.314542	0.600491	1.00664		0.671333	1.59254	4.45211e-06	0.390836	1.31115	0.00961346	0.285949	1.21921	0.112437		Olink ORGAN DAMAGE(v.3311)
Q9Y6D9	ENSG00000002822	MAD1L1	shared Severe vs mild/control 226 up		1.80561	1.93581	3.68279		1.84079	3.58206	2.92255e-13	1.72206	3.29906	1.45075e-11	0.130199	1.09444	0.742615		Olink NEURO EXPLORATORY(v.3911)
