# Supplementary material for: Robust prognostic signatures derived from proteomic panel profiling of plasma from patients with severe COVID-19 complications
Source: Research Square preprint supplement (doi:10.21203/rs.3.rs-126482/v1), 2021-03-08
Supplement: Supplementary file 7 [file 95ad8f8ddbd89914bf5e5190.xlsx]

## Sheet: Table S5A
Table S5A: GO Biological Process Enrichment for the Severity Score (Figure 4)
Description	pValue	adjustedPValue
Immune system process	2.6053e-09	3.1472e-06
Res. steroid hormone stimulus	2.0203e-07	9.6859e-05
Res. corticosteroid stimulus	4.6686e-07	9.6859e-05
Res. glucocorticoid stimulus	3.0854e-07	9.6859e-05
Enzyme linked receptor protein signal.	4.5166e-07	9.6859e-05
(+) Reg. of cell prolif.	4.8109e-07	9.6859e-05
Immune response	8.7909e-07	0.00015171
Locomotion	3.314e-06	0.00050042
Hepatic immune res.	8.0138e-06	0.00079188
Signaling	8.5219e-06	0.00079188
Cell surf. Receptor signal	6.851e-06	0.00079188
Susceptibility to T cell-mediated cytotox.	8.0138e-06	0.00079188
Reg. smooth muscle cell prolif.	7.2539e-06	0.00079188
Anatomical devel.	1.0606e-05	0.00090017
System devel.	1.1298e-05	0.00090017
Res. E2 stimulus	1.7536e-05	0.0010985
Reg. cell prolif.	1.8188e-05	0.0010985
Res. wounding	1.7561e-05	0.0010985
Susceptibility to NK cells-mediated cytotox.	2.3998e-05	0.001212
Germ cell programmed death	2.3998e-05	0.001212
IL6-mediated signal.	2.3998e-05	0.001212
Res. hormone stimulus	2.989e-05	0.0014258
(+) Reg. cell migration	3.0689e-05	0.0014258
Transmembrane RTK signal.	3.4537e-05	0.0015452
(+) Reg. cell movement	4.2521e-05	0.0017712
(+) Reg. locomotion	4.2521e-05	0.0017712
(+) Reg. osteoblast diff.	5.4264e-05	0.0019675
Defense response	5.1309e-05	0.0019675
(+) Reg. biological process	5.5244e-05	0.0019675
Developmental process	5.7908e-05	0.001998
Cell development	5.9543e-05	0.001998
(+) Reg. smooth muscle cell prolif.	7.5808e-05	0.002093
(+) Reg. T cell mediated cytotox.	7.9702e-05	0.002093
Reproductive process	6.9905e-05	0.002093
Organ/tissue specific immune resp.	7.9702e-05	0.002093
Reproduction	7.2118e-05	0.002093
(+) Reg. cellular process	6.5981e-05	0.002093
Organ development	7.2e-05	0.002093
Res. endogenous stimulus	6.5859e-05	0.002093
(+) Reg. immune process	9.9596e-05	0.0024832
Res. stimulus	0.00010072	0.0024832
(+) Reg. res. to stimulus	0.00010595	0.0024855
Reg. NK cell- mediated cytotox.	0.00011934	0.0024855
(+) Reg. NK cell-mediated cytotox.	0.00011934	0.0024855
Virion attachment to host surface receptor	0.00011934	0.0024855
Reg. NK-cell mediated immune response	0.00011934	0.0024855
(+) Reg. DNA rep.	0.0001123	0.0024855
(+) Reg. anti-apoptosis	0.0001123	0.0024855
(+) Reg. NK cell- mediated immune response	0.00011934	0.0024855
Reproductive cell process	0.00011842	0.0024855
Signal transduction	0.00012381	0.002535
Cell migration	0.00013733	0.0027196
Reg. response to biotic stimulus	0.00014608	0.0028437
Reg. T cell-mediated cytotox.	0.00016677	0.0030993
Reg. immune process	0.00017968	0.0032396
Reproductive devel. process	0.00017896	0.0032396
Reg. immune res. to tumor cell	0.00022195	0.003482
(+) Reg. res. to tumor cell	0.00022195	0.003482
Devel. programmed cell death	0.00022195	0.003482
Mesenchymal-epithelial cell signal.	0.00022195	0.003482
Multicell. organismal devel.	0.00021331	0.003482
Reg. anti-apoptosis	0.00020054	0.003482
Cell-cell commun.	0.00022058	0.003482
(+) Reg. immune res. to tumor cell	0.00022195	0.003482
Reg. res. to tumor cell	0.00022195	0.003482
Reg. immune effector process	0.00022517	0.0034872
Cell motility	0.00025082	0.0037874
Localization of cell	0.00025082	0.0037874
Res. stress	0.00025883	0.00386
Reg. signal transduction	0.00027515	0.0040482
Germ cell migration	0.00028485	0.0040482
(+) Reg. response to biotic stimulus	0.00028485	0.0040482
Reg. signal. process	0.00028866	0.0040547
Entry into host cell	0.00035541	0.0045194
Entry of virus into host cell	0.00035541	0.0045194
Entry into other organism	0.00035541	0.0045194
Entry into cell of other organism	0.00035541	0.0045194
Organism movement involved in symbiotic interaction	0.00035541	0.0045194
Movement in host environment	0.00035541	0.0045194
Reg. of osteoblast diff.	0.00034552	0.0045194
Reg. devel. process	0.0003264	0.0045194
Entry into host	0.00035541	0.0045194
Reg. cell migration	0.00036064	0.004538
(+) Reg. protein aa phosphoryl.	0.00037514	0.0046719
Signal. pathway	0.00043447	0.0050956
(+) of T cell- mediated immunity	0.00043361	0.0050956
Reg. devel. pigmentation	0.00043361	0.0050956
Reg. signal. pathway	0.0004156	0.0050956
(+) Reg. metabolic process	0.00046772	0.0054328
Cell diff.	0.00052989	0.0059309
(+) Reg. phosphoryl.	0.00052306	0.0059309
Reg. immune res.	0.00053025	0.0059309
Signal transmission	0.00058217	0.0061153
Signal. process	0.00058217	0.0061153
(+) Reg. phosphorus metabolic process	0.00056971	0.0061153
(+) Reg. phosphate metabolic process	0.00056971	0.0061153
(+) Reg. nitrogen compound metabolic process	0.00057542	0.0061153
Reg. cellular component movement	0.00057253	0.0061153
Reg. phosphorylation	0.00060419	0.0061863
(+) Reg. peptidyl-tyrosine phosphoryl.	0.00060429	0.0061863
Reg. locomotion	0.0005946	0.0061863
Reg. response to stimulus	0.00064698	0.006513
Cellular develop. process	0.00068936	0.006845
(+) Reg. signal. pathway	0.0006913	0.006845
Reg. phosphorus metabolic process	0.00079006	0.0072855
Reg. phosphate metabolic process	0.00079006	0.0072855
Res. to E2 stimulus	0.00077002	0.0072855
(+) Reg. immune res.	0.00078618	0.0072855
(+) Reg. cell diff.	0.00076752	0.0072855
Develop. primary sexual character.	0.00078618	0.0072855
(+) Reg. DNA metabolic process	0.00080629	0.0072995
(+) Reg. NK cell- mediated immunity	0.0008218	0.0072995
(+) Reg. NK cell mediated cytotox.	0.0008218	0.0072995
(+) Reg. cellular biosynthetic process	0.00086256	0.0076056
(+) Reg. leukocyte prolif.	0.00088205	0.0077211
Reg. cell diff.	0.0008892	0.0077277
Reg. MAPK activity	0.00091375	0.0078843
Hemopoietic progenitor cell differ.	0.0009375	0.0080319
(+) Reg. biosynthetic process	0.0009521	0.0080429
Initiation of signal transduction	0.0010908	0.0086964
(+) Reg. cell commun.	0.0010661	0.0086964
Reg. T cell-mediated immunity	0.0010606	0.0086964
Signal initiation by diffusible mediator	0.0010908	0.0086964
Reg. biological process	0.0010843	0.0086964
Signal initiation by protein/peptide mediator	0.0010908	0.0086964
Cytokine-mediated signal.	0.0010468	0.0086964
(+) Reg. signal transduction	0.0010943	0.0086964
(+) Reg. leukocyte- mediated cytotox.	0.001191	0.0089919
(+) Reg. signaling	0.0011853	0.0089919
Reg. cellular process	0.0011699	0.0089919
(+) Reg. macromolecule metabolic process	0.0011476	0.0089919
Reg. NK cell-mediated immunity	0.001191	0.0089919
Reg. NK cell-mediated cytotox.	0.001191	0.0089919
Reproductive structure devel.	0.0011845	0.0089919
Reg. DNA repl.	0.0012298	0.0092276
Nervous system devel.t	0.0012516	0.0093333
Endocrine pancreas devel.	0.0013287	0.0097276
Dev. primary male sexual character.	0.0013285	0.0097276
Endocrine system devel.	0.0013796	0.0098667
Reg. peptidyl-tyrosine phosphoryl.	0.0013796	0.0098667
(+) Reg. cellular metabolic process	0.0013804	0.0098667

## Sheet: Table S5B BinGO
Table S5B: GO Biological Process Enrichment for the Severity Score in Cytoscape BinGO (Figure S5)
GO	Short ID	p-value	Corrected p-value	Cluster frequency	% cluster frequence	Total Frequency	% total frequency	Genes	Deconvolution
virion attachment to host cell surface receptor	Virion attachment to host surface receptor	0.00012533	0.0013096	2/42	0.047	6/14303	0	ACE2 PVRL2	Viral Entry
entry into host cell	Entry into host cell	0.0003732	0.0026844	2/42	0.047	10/14303	0	ACE2 PVRL2
entry into host	Entry into host	0.0003732	0.0026844	2/42	0.047	10/14303	0	ACE2 PVRL2
entry of virus into host cell	Entry of virus into host cell	0.0003732	0.0026844	2/42	0.047	10/14303	0	ACE2 PVRL2
entry into cell of other organism involved in symbiotic interaction	Entry into cell of other organism	0.0003732	0.0026844	2/42	0.047	10/14303	0	ACE2 PVRL2
entry into other organism involved in symbiotic interaction	Entry into other organism	0.0003732	0.0026844	2/42	0.047	10/14303	0	ACE2 PVRL2
movement in host environment	Movement in host environment	0.0003732	0.0026844	2/42	0.047	10/14303	0	ACE2 PVRL2
movement in environment of other organism involved in symbiotic interaction	Organism movement involved in symbiotic interaction	0.0003732	0.0026844	2/42	0.047	10/14303	0	ACE2 PVRL2
locomotion	Locomotion	4.2598e-07	3.3945e-05	10/42	0.238	441/14303	0.03	ACE2 IL6 KITLG CDH2 CCL7 HGF KIT PVR IL6R PVRL2	Cell migration and locomotion
positive regulation of cell migration	(+) Reg. cell migration	1.9252e-06	9.8909e-05	6/42	0.142	129/14303	0.009	BMP4 PDGFRA IL6 HGF KIT IL6R
positive regulation of locomotion	(+) Reg. locomotion	2.852e-06	0.00012559	6/42	0.142	138/14303	0.009	BMP4 PDGFRA IL6 HGF KIT IL6R
response to wounding	Res. wounding	2.767e-06	0.00012559	10/42	0.238	542/14303	0.037	PDGFRA IL6 MSTN CCL7 IL15 HGF TNC ADM PTX3 IL6R
positive regulation of cellular component movement	(+) Reg. cell movement	2.852e-06	0.00012559	6/42	0.142	138/14303	0.009	BMP4 PDGFRA IL6 HGF KIT IL6R
cell migration	Cell migration	1.6061e-05	0.00037832	7/42	0.166	282/14303	0.019	IL6 KITLG CDH2 HGF KIT PVR IL6R
cell motility	Cell motility	3.2709e-05	0.00060194	7/42	0.166	315/14303	0.022	IL6 KITLG CDH2 HGF KIT PVR IL6R
localization of cell	Localization of cell	3.2709e-05	0.00060194	7/42	0.166	315/14303	0.022	IL6 KITLG CDH2 HGF KIT PVR IL6R
regulation of cell migration	Reg. cell migration	3.7835e-05	0.0006761	6/42	0.142	217/14303	0.015	BMP4 PDGFRA IL6 HGF KIT IL6R
regulation of cellular component movement	Reg. cellular component movement	6.6326e-05	0.00090867	6/42	0.142	240/14303	0.016	BMP4 PDGFRA IL6 HGF KIT IL6R
regulation of locomotion	Reg. locomotion	6.9447e-05	0.00094097	6/42	0.142	242/14303	0.016	BMP4 PDGFRA IL6 HGF KIT IL6R
immune system process	Immune system process	4.2614e-10	5.2544e-07	17/42	0.404	949/14303	0.066	TINAGL1 IL15 HGF IL1R2 BMP4 IL1RL1 CLEC4C IL6 KITLG CCL7 BANK1 KIT PTX3 CEACAM8 IL6R SKAP1 IL18R1	Immune response
hepatic immune response	Hepatic immune res.	2.3545e-08	5.8063e-06	3/42	0.071	3/14303	0	IL6 HGF IL6R
interleukin-6-mediated signaling pathway	IL6-mediated signal.	9.3988e-08	1.6555e-05	3/42	0.071	4/14303	0	IL6 HGF IL6R
immune response	Immune response	1.3251e-07	2.0366e-05	12/42	0.285	620/14303	0.043	IL1RL1 CLEC4C IL6 TINAGL1 CCL7 IL15 HGF IL1R2 PTX3 CEACAM8 IL6R IL18R1
organ or tissue specific immune response	Organ/tissue specific immune resp.	4.6802e-07	3.3945e-05	3/42	0.071	6/14303	0	IL6 HGF IL6R
regulation of anti-apoptosis	Reg. anti-apoptosis	6.0108e-06	0.00021224	4/42	0.095	41/14303	0.002	IL6 HGF ADM IL6R
susceptibility to T cell mediated cytotoxicity	Susceptibility to T cell-mediated cytotox.	8.418e-06	0.00026614	2/42	0.047	2/14303	0	PVR PVRL2
defense response	Defense response	9.2433e-06	0.0002819	10/42	0.238	621/14303	0.043	IL1RL1 CLEC4C IL6 CCL7 IL15 HGF PTX3 IL6R IL17RB IL18R1
positive regulation of immune system process	(+) Reg. immune process	1.0996e-05	0.0003071	7/42	0.166	266/14303	0.018	IL6 IL15 HGF PVR IL6R PVRL2 SKAP1
regulation of immune effector process	Reg. immune effector process	1.3906e-05	0.00034287	5/42	0.119	106/14303	0.007	IL6 IL15 HGF PVR PVRL2
susceptibility to natural killer cell mediated cytotoxicity	Susceptibility to NK cells-mediated cytotox.	2.5207e-05	0.00050881	2/42	0.047	3/14303	0	PVR PVRL2
regulation of immune system process	Reg. immune process	2.7649e-05	0.00052449	8/42	0.19	425/14303	0.029	IL6 KITLG IL15 HGF PVR IL6R PVRL2 SKAP1
positive regulation of leukocyte proliferation	(+) Reg. leukocyte prolif.	4.3049e-05	0.00071528	4/42	0.095	67/14303	0.004	IL6 KITLG IL15 HGF
cytokine-mediated signaling pathway	Cytokine-mediated signal.	5.4109e-05	0.0007849	4/42	0.095	71/14303	0.004	IL6 HGF KIT IL6R
initiation of signal transduction	Initiation of signal transduction	5.7171e-05	0.00080104	4/42	0.095	72/14303	0.005	IL6 HGF KIT IL6R
signal initiation by diffusible mediator	Signal initiation by diffusible mediator	5.7171e-05	0.00080104	4/42	0.095	72/14303	0.005	IL6 HGF KIT IL6R
signal initiation by protein/peptide mediator	Signal initiation by protein/peptide mediator	5.7171e-05	0.00080104	4/42	0.095	72/14303	0.005	IL6 HGF KIT IL6R
regulation of immune response	Reg. immune res.	6.0421e-05	0.00083706	6/42	0.142	236/14303	0.016	IL6 IL15 HGF PVR PVRL2 SKAP1
positive regulation of T cell mediated cytotoxicity	(+) Reg. T cell mediated cytotox.	8.371e-05	0.0010641	2/42	0.047	5/14303	0	PVR PVRL2
regulation of natural killer cell mediated immune response to tumor cell	Reg. NK-cell mediated immune response	0.00012533	0.0013096	2/42	0.047	6/14303	0	PVR PVRL2
positive regulation of natural killer cell mediated immune response to tumor cell	(+) Reg. NK cell- mediated immune response	0.00012533	0.0013096	2/42	0.047	6/14303	0	PVR PVRL2
regulation of natural killer cell mediated cytotoxicity directed against tumor cell target	Reg. NK cell- mediated cytotox.	0.00012533	0.0013096	2/42	0.047	6/14303	0	PVR PVRL2
positive regulation of natural killer cell mediated cytotoxicity directed against tumor cell target	(+) Reg. NK cell-mediated cytotox.	0.00012533	0.0013096	2/42	0.047	6/14303	0	PVR PVRL2
regulation of T cell mediated cytotoxicity	Reg. T cell-mediated cytotox.	0.00017514	0.0017032	2/42	0.047	7/14303	0	PVR PVRL2
regulation of response to tumor cell	Reg. res. to tumor cell	0.00023308	0.0020097	2/42	0.047	8/14303	0	PVR PVRL2
positive regulation of response to tumor cell	(+) Reg. res. to tumor cell	0.00023308	0.0020097	2/42	0.047	8/14303	0	PVR PVRL2
regulation of immune response to tumor cell	Reg. immune res. to tumor cell	0.00023308	0.0020097	2/42	0.047	8/14303	0	PVR PVRL2
positive regulation of immune response to tumor cell	(+) Reg. immune res. to tumor cell	0.00023308	0.0020097	2/42	0.047	8/14303	0	PVR PVRL2
positive regulation of response to biotic stimulus	(+) Reg. response to biotic stimulus	0.00029912	0.0023794	2/42	0.047	9/14303	0	PVR PVRL2
positive regulation of T cell mediated immunity	(+) of T cell- mediated immunity	0.00045528	0.0031187	2/42	0.047	11/14303	0	PVR PVRL2
positive regulation of natural killer cell mediated immunity	(+) Reg. NK cell- mediated immunity	0.00086273	0.0050371	2/42	0.047	15/14303	0.001	PVR PVRL2
positive regulation of natural killer cell mediated cytotoxicity	(+) Reg. NK cell mediated cytotox.	0.00086273	0.0050371	2/42	0.047	15/14303	0.001	PVR PVRL2
positive regulation of immune response	(+) Reg. immune res.	0.00086278	0.0050371	4/42	0.095	146/14303	0.01	IL15 PVR PVRL2 SKAP1
regulation of T cell mediated immunity	Reg. T cell-mediated immunity	0.0011133	0.0060738	2/42	0.047	17/14303	0.001	PVR PVRL2
positive regulation of leukocyte mediated cytotoxicity	(+) Reg. leukocyte- mediated cytotox.	0.0012501	0.0065871	2/42	0.047	18/14303	0.001	PVR PVRL2
regulation of natural killer cell mediated immunity	Reg. NK cell-mediated immunity	0.0012501	0.0065871	2/42	0.047	18/14303	0.001	PVR PVRL2
regulation of natural killer cell mediated cytotoxicity	Reg. NK cell-mediated cytotox.	0.0012501	0.0065871	2/42	0.047	18/14303	0.001	PVR PVRL2
enzyme linked receptor protein signaling pathway	Enzyme linked receptor protein signal.	5.5019e-07	3.7688e-05	9/42	0.214	345/14303	0.024	BMP4 NTRK2 PDGFRA MSTN HGF KIT PTN AREG ANGPTL1	Signalling
cell surface receptor linked signaling pathway	Cell surf. Receptor signal	9.3738e-06	0.0002819	14/42	0.333	1279/14303	0.089	NTRK2 PDGFRA MSTN HGF TNFRSF10B GFRA1 PTN AREG BMP4 IL6 KIT IL6R SKAP1 ANGPTL1
signaling	Signaling	1.4182e-05	0.00034287	22/42	0.523	3130/14303	0.218	NTRK2 PDGFRA MSTN IL15 HGF IGFBP2 TNC TNFRSF10B ADM GFRA1 PTN AREG BMP4 IL1RL1 IL6 KITLG CCL7 KIT IL6R SKAP1 IL18R1 ANGPTL1
positive regulation of protein amino acid phosphorylation	(+) Reg. protein aa phosphoryl.	2.641e-05	0.00050881	5/42	0.119	121/14303	0.008	BMP4 IL6 KITLG HGF IL6R
positive regulation of peptidyl-tyrosine phosphorylation	(+) Reg. peptidyl-tyrosine phosphoryl.	2.6e-05	0.00050881	4/42	0.095	59/14303	0.004	IL6 KITLG HGF IL6R
transmembrane receptor protein tyrosine kinase signaling pathway	Transmembrane RTK signal.	3.8822e-05	0.00068382	6/42	0.142	218/14303	0.015	NTRK2 PDGFRA HGF KIT AREG ANGPTL1
positive regulation of phosphorylation	(+) Reg. phosphoryl.	4.013e-05	0.00068723	5/42	0.119	132/14303	0.009	BMP4 IL6 KITLG HGF IL6R
positive regulation of phosphorus metabolic process	(+) Reg. phosphorus metabolic process	4.469e-05	0.00071528	5/42	0.119	135/14303	0.009	BMP4 IL6 KITLG HGF IL6R
positive regulation of phosphate metabolic process	(+) Reg. phosphate metabolic process	4.469e-05	0.00071528	5/42	0.119	135/14303	0.009	BMP4 IL6 KITLG HGF IL6R
regulation of peptidyl-tyrosine phosphorylation	Reg. peptidyl-tyrosine phosphoryl.	7.8264e-05	0.0010158	4/42	0.095	78/14303	0.005	IL6 KITLG HGF IL6R
regulation of signaling pathway	Reg. signal. pathway	0.00010745	0.0012618	11/42	0.261	1002/14303	0.07	BMP4 IL1RL1 IL6 KITLG CDH2 HGF IGFBP2 KIT TNFRSF10B IL6R RGMA
positive regulation of signaling pathway	(+) Reg. signal. pathway	0.00010866	0.0012639	7/42	0.166	381/14303	0.026	BMP4 IL6 KITLG HGF KIT TNFRSF10B IL6R
positive regulation of signal transduction	(+) Reg. signal transduction	0.00014593	0.0014994	6/42	0.142	277/14303	0.019	BMP4 IL6 KITLG HGF TNFRSF10B IL6R
positive regulation of signaling process	(+) Reg. signaling	0.00016087	0.0016258	6/42	0.142	282/14303	0.019	BMP4 IL6 KITLG HGF TNFRSF10B IL6R
signal transduction	Signal transduction	0.00016881	0.0016922	15/42	0.357	1877/14303	0.131	IL15 HGF IGFBP2 TNC TNFRSF10B ADM BMP4 IL1RL1 IL6 KITLG CCL7 KIT IL6R IL18R1 ANGPTL1
positive regulation of cell communication	(+) Reg. cell commun.	0.00018175	0.0017239	7/42	0.166	414/14303	0.028	BMP4 IL6 KITLG HGF KIT TNFRSF10B IL6R
mesenchymal-epithelial cell signaling	Mesenchymal-epithelial cell signal.	0.00023308	0.0020097	2/42	0.047	8/14303	0	HGF TNC
cell-cell signaling	Cell-cell signal.	0.00026319	0.002201	8/42	0.19	587/14303	0.041	BMP4 IL6 CCL7 IL15 HGF TNC ADM AREG
regulation of signal transduction	Reg. signal transduction	0.00033096	0.0025665	9/42	0.214	772/14303	0.053	BMP4 IL1RL1 IL6 KITLG CDH2 HGF KIT TNFRSF10B IL6R
regulation of signaling process	Reg. signal. process	0.00034713	0.0026584	9/42	0.214	777/14303	0.054	BMP4 IL1RL1 IL6 KITLG CDH2 HGF KIT TNFRSF10B IL6R
signaling pathway	Signal. pathway	0.00058343	0.0037652	15/42	0.357	2099/14303	0.146	NTRK2 PDGFRA MSTN HGF TNFRSF10B ADM GFRA1 PTN AREG BMP4 IL6 KIT IL6R SKAP1 ANGPTL1
regulation of phosphorylation	Reg. phosphorylation	0.00070361	0.0044263	7/42	0.166	518/14303	0.036	BMP4 IL6 KITLG HGF KIT TNFRSF10B IL6R
signaling process	Signal. process	0.00077867	0.0048246	15/42	0.357	2156/14303	0.15	IL15 HGF IGFBP2 TNC TNFRSF10B ADM BMP4 IL1RL1 IL6 KITLG CCL7 KIT IL6R IL18R1 ANGPTL1
signal transmission	Signal transmission	0.00077867	0.0048246	15/42	0.357	2156/14303	0.15	IL15 HGF IGFBP2 TNC TNFRSF10B ADM BMP4 IL1RL1 IL6 KITLG CCL7 KIT IL6R IL18R1 ANGPTL1
regulation of phosphate metabolic process	Reg. phosphate metabolic process	0.00091872	0.0052444	7/42	0.166	542/14303	0.037	BMP4 IL6 KITLG HGF KIT TNFRSF10B IL6R
regulation of phosphorus metabolic process	Reg. phosphorus metabolic process	0.00091872	0.0052444	7/42	0.166	542/14303	0.037	BMP4 IL6 KITLG HGF KIT TNFRSF10B IL6R
regulation of MAP kinase activity	Reg. MAPK activity	0.0010024	0.0055928	4/42	0.095	152/14303	0.01	BMP4 KITLG HGF KIT
response to corticosteroid stimulus	Res. corticosteroid stimulus	2.0506e-08	5.8063e-06	7/42	0.166	105/14303	0.007	BMP4 IL6 MSTN HGF IGFBP2 ADM IL6R	Response to stimulus and metabolism
response to glucocorticoid stimulus	Res. glucocorticoid stimulus	1.2653e-08	5.8063e-06	7/42	0.166	98/14303	0.006	BMP4 IL6 MSTN HGF IGFBP2 ADM IL6R
response to steroid hormone stimulus	Res. steroid hormone stimulus	1.4842e-08	5.8063e-06	9/42	0.214	226/14303	0.015	BMP4 PDGFRA IL6 KRT19 MSTN HGF IGFBP2 ADM IL6R
positive regulation of cell proliferation	(+) Reg. of cell prolif.	5.8747e-08	1.2072e-05	11/42	0.261	460/14303	0.032	BMP4 PDGFRA IL6 KITLG IL15 HGF KIT ADM PRTN3 PTN IL6R
response to hormone stimulus	Res. hormone stimulus	4.266e-06	0.00017533	9/42	0.214	442/14303	0.03	BMP4 PDGFRA IL6 KRT19 MSTN HGF IGFBP2 ADM IL6R
response to endogenous stimulus	Res. endogenous stimulus	1.0488e-05	0.0003071	9/42	0.214	494/14303	0.034	BMP4 PDGFRA IL6 KRT19 MSTN HGF IGFBP2 ADM IL6R
positive regulation of response to stimulus	(+) Reg. res. to stimulus	1.1827e-05	0.00031028	7/42	0.166	269/14303	0.018	IL6 IL15 HGF PVR IL6R PVRL2 SKAP1
positive regulation of biological process	(+) Reg. biological process	1.9551e-05	0.00043596	18/42	0.428	2208/14303	0.154	PDGFRA MSTN IL15 HGF TNFRSF10B ADM PTN AREG PVR BMP4 IL6 KITLG KIT PRTN3 PTX3 IL6R PVRL2 SKAP1
response to estrogen stimulus	Res. E2 stimulus	1.98e-05	0.00043596	5/42	0.119	114/14303	0.007	BMP4 PDGFRA KRT19 MSTN IGFBP2
positive regulation of cellular process	(+) Reg. cellular process	2.2418e-05	0.00048494	17/42	0.404	2004/14303	0.14	PDGFRA MSTN IL15 HGF TNFRSF10B ADM PTN AREG BMP4 IL6 KITLG KIT PRTN3 PTX3 IL6R PVRL2 SKAP1
response to stimulus	Res. stimulus	4.5829e-05	0.00071528	23/42	0.547	3632/14303	0.253	PDGFRA TINAGL1 MSTN IL15 HGF IL1R2 IGFBP2 TNC ADM PTN IL17RB BMP4 IL1RL1 ACE2 CLEC4C IL6 KRT19 CCL7 KIT PTX3 CEACAM8 IL6R IL18R1
response to stress	Res. stress	8.8438e-05	0.0011015	15/42	0.357	1774/14303	0.124	PDGFRA MSTN IL15 HGF IGFBP2 TNC ADM IL17RB IL1RL1 CLEC4C IL6 CCL7 PTX3 IL6R IL18R1
positive regulation of DNA replication	(+) Reg. DNA rep.	0.00012082	0.0013096	3/42	0.071	33/14303	0.002	PDGFRA KITLG AREG
positive regulation of metabolic process	(+) Reg. metabolic process	0.0001249	0.0013096	11/42	0.261	1019/14303	0.071	BMP4 PDGFRA IL6 KITLG MSTN HGF KIT PTX3 AREG IL6R SKAP1
regulation of response to stimulus	Reg. response to stimulus	0.00012246	0.0013096	8/42	0.19	525/14303	0.036	ACE2 IL6 IL15 HGF PVR IL6R PVRL2 SKAP1
positive regulation of nitrogen compound metabolic process	(+) Reg. nitrogen compound metabolic process	0.00012497	0.0013096	9/42	0.214	678/14303	0.047	BMP4 PDGFRA IL6 KITLG MSTN HGF PTX3 AREG SKAP1
regulation of response to biotic stimulus	Reg. response to biotic stimulus	0.00015714	0.0016013	3/42	0.071	36/14303	0.002	IL15 PVR PVRL2
positive regulation of cellular biosynthetic process	(+) Reg. cellular biosynthetic process	0.00019889	0.0018673	9/42	0.214	721/14303	0.05	BMP4 PDGFRA IL6 KITLG MSTN HGF PTX3 AREG SKAP1
positive regulation of biosynthetic process	(+) Reg. biosynthetic process	0.0002228	0.0020097	9/42	0.214	732/14303	0.051	BMP4 PDGFRA IL6 KITLG MSTN HGF PTX3 AREG SKAP1
positive regulation of macromolecule metabolic process	(+) Reg. macromolecule metabolic process	0.00031062	0.0024551	10/42	0.238	942/14303	0.065	BMP4 PDGFRA IL6 KITLG MSTN HGF KIT AREG IL6R SKAP1
positive regulation of cellular metabolic process	(+) Reg. cellular metabolic process	0.00038324	0.0027314	10/42	0.238	967/14303	0.067	BMP4 PDGFRA IL6 KITLG MSTN HGF PTX3 AREG IL6R SKAP1
regulation of biological process	Reg. biological process	0.00068114	0.0043069	30/42	0.714	6551/14303	0.458	MSTN TNC ADM PTN AREG PVR COMP IL1RL1 CDH2 CCL7 IL6R NTRK2 PDGFRA IL15 HGF IGFBP2 TNFRSF10B IL17RB RGMA BMP4 ACE2 IL6 KITLG KIT PRTN3 PTX3 PVRL2 SKAP1 IL18R1 ANGPTL1
response to estradiol stimulus	Res. to E2 stimulus	0.00082716	0.0050241	3/42	0.071	63/14303	0.004	BMP4 PDGFRA IGFBP2
positive regulation of DNA metabolic process	(+) Reg. DNA metabolic process	0.00086607	0.0050371	3/42	0.071	64/14303	0.004	PDGFRA KITLG AREG
regulation of DNA replication	Reg. DNA repl.	0.0013203	0.0067833	3/42	0.071	74/14303	0.005	PDGFRA KITLG AREG
regulation of developmental process	Reg. devel. process	0.00039593	0.0028056	9/42	0.214	791/14303	0.055	BMP4 IL6 KITLG MSTN CDH2 IL15 HGF KIT IL6R	Development
germ cell migration	Germ cell migration	0.00029912	0.0023794	2/42	0.047	9/14303	0	KITLG KIT
regulation of osteoblast differentiation	Reg. of osteoblast diff.	1.2364e-05	0.00031759	4/42	0.095	49/14303	0.003	BMP4 IL6 HGF IL6R
positive regulation of osteoblast differentiation	(+) Reg. osteoblast diff.	1.0731e-06	6.3009e-05	4/42	0.095	27/14303	0.001	BMP4 IL6 HGF IL6R
positive regulation of smooth muscle cell proliferation	(+) Reg. smooth muscle cell prolif.	1.6651e-06	8.9263e-05	4/42	0.095	30/14303	0.002	BMP4 IL6 HGF IL6R
endocrine system development	Endocrine system devel.	7.8264e-05	0.0010158	4/42	0.095	78/14303	0.005	BMP4 IL6 HGF IL6R
cell development	Cell development	1.078e-05	0.0003071	10/42	0.238	632/14303	0.044	BMP4 IL6 KRT19 KITLG HGF KIT TNC ADM PTX3 PVRL2
reproduction	Reproduction	9.0062e-05	0.0011105	10/42	0.238	810/14303	0.056	BMP4 PDGFRA ACE2 KITLG MSTN IGFBP2 KIT TNC ADM PVRL2
reproductive process	Reproductive process	8.7315e-05	0.0010986	10/42	0.238	807/14303	0.056	BMP4 PDGFRA ACE2 KITLG MSTN IGFBP2 KIT TNC ADM PVRL2
positive regulation of anti-apoptosis	(+) Reg. anti-apoptosis	2.7939e-06	0.00012559	4/42	0.095	34/14303	0.002	IL6 HGF ADM IL6R
endocrine pancreas development	Endocrine pancreas devel.	2.5924e-05	0.00050881	3/42	0.071	20/14303	0.001	IL6 HGF IL6R
developmental programmed cell death	Devel. programmed cell death	0.00023308	0.0020097	2/42	0.047	8/14303	0	KITLG KIT
germ cell programmed cell death	Germ cell programmed death	2.5207e-05	0.00050881	2/42	0.047	3/14303	0	KITLG KIT
regulation of developmental pigmentation	Reg. devel. pigmentation	0.00045528	0.0031187	2/42	0.047	11/14303	0	KITLG KIT
cell differentiation	Cell diff.	0.00018091	0.0017239	14/42	0.333	1668/14303	0.116	NTRK2 PDGFRA IL15 HGF TNC ADM BMP4 IL6 KRT19 KITLG CDH2 KIT PTX3 PVRL2
cellular developmental process	Cellular develop. process	0.00024169	0.0020695	14/42	0.333	1714/14303	0.119	NTRK2 PDGFRA IL15 HGF TNC ADM BMP4 IL6 KRT19 KITLG CDH2 KIT PTX3 PVRL2
multicellular organismal development	Multicell. organismal devel.	2.4112e-05	0.00050881	21/42	0.5	2971/14303	0.207	NTRK2 PDGFRA MSTN IL15 HGF TNC ADM GFRA1 PTN PTS RGMA COMP BMP4 IL6 KRT19 KITLG CDH2 KIT PTX3 IL6R MATN3
system development	System devel.	8.1555e-07	5.0286e-05	21/42	0.5	2421/14303	0.169	NTRK2 PDGFRA MSTN IL15 HGF TNC ADM GFRA1 PTN PTS RGMA COMP BMP4 IL6 KRT19 KITLG CDH2 KIT PTX3 IL6R MATN3
positive regulation of cell differentiation	(+) Reg. cell diff.	9.4737e-05	0.0011565	6/42	0.142	256/14303	0.017	BMP4 IL6 KITLG HGF KIT IL6R
anatomical structure development	Anatomical devel.	8.1567e-07	5.0286e-05	22/42	0.523	2655/14303	0.185	NTRK2 PDGFRA MSTN IL15 HGF TNC ADM GFRA1 PTN PTS RGMA COMP BMP4 IL6 KRT19 KITLG CDH2 KIT PTX3 IL6R PVRL2 MATN3
development of primary male sexual characteristics	Dev. primary male sexual character.	0.0014261	0.007296	3/42	0.071	76/14303	0.005	PDGFRA KITLG KIT
development of primary sexual characteristics	Develop. primary sexual character.	0.00086278	0.0050371	4/42	0.095	146/14303	0.01	BMP4 PDGFRA KITLG KIT
developmental process	Developmental process	6.0245e-06	0.00021224	23/42	0.547	3234/14303	0.226	NTRK2 PDGFRA MSTN IL15 HGF IGFBP2 TNC ADM GFRA1 PTN PTS RGMA COMP BMP4 IL6 KRT19 KITLG CDH2 KIT PTX3 IL6R PVRL2 MATN3
hemopoietic progenitor cell differentiation	Hemopoietic progenitor cell differ.	0.00098414	0.0055408	2/42	0.047	16/14303	0.001	BMP4 KIT
nervous system development	Nervous system devel.	1.6262e-05	0.00037832	13/42	0.309	1156/14303	0.08	NTRK2 PDGFRA HGF ADM GFRA1 PTN PTS RGMA BMP4 IL6 CDH2 KIT PTX3
organ development	Organ development	4.8946e-06	0.00019001	17/42	0.404	1791/14303	0.125	PDGFRA MSTN IL15 HGF TNC ADM PTN RGMA COMP BMP4 IL6 KRT19 KITLG CDH2 KIT PTX3 IL6R
regulation of cell differentiation	Reg. cell diff.	0.00017738	0.0017086	8/42	0.19	554/14303	0.038	BMP4 IL6 KITLG CDH2 IL15 HGF KIT IL6R
regulation of cell proliferation	Reg. cell prolif.	3.738e-06	0.00015893	12/42	0.285	849/14303	0.059	BMP4 PDGFRA ACE2 IL6 KITLG IL15 HGF KIT ADM PRTN3 PTN IL6R
regulation of cellular process	Reg. cellular process	0.0020496	0.0095366	28/42	0.666	6221/14303	0.434	MSTN TNC ADM PTN AREG COMP IL1RL1 CDH2 CCL7 IL6R NTRK2 PDGFRA IL15 HGF IGFBP2 TNFRSF10B IL17RB BMP4 ACE2 IL6 KITLG KIT PRTN3 PTX3 PVRL2 SKAP1 IL18R1 ANGPTL1
regulation of developmental process	Reg. devel. process	0.00039593	0.0028056	9/42	0.214	791/14303	0.055	BMP4 IL6 KITLG MSTN CDH2 IL15 HGF KIT IL6R
reproductive cellular process	Reproductive cell process	0.00013328	0.0013809	5/42	0.119	170/14303	0.011	BMP4 KITLG KIT TNC PVRL2
reproductive developmental process	Reproductive devel. process	0.00020545	0.0019046	6/42	0.142	295/14303	0.02	BMP4 PDGFRA KITLG KIT TNC PVRL2
reproductive structure development	Reproductive structure devel.	0.0012987	0.006728	4/42	0.095	163/14303	0.011	BMP4 KITLG KIT TNC
germ cell migration	Germ cell migration	0.00029912	0.0023794	2/42	0.047	9/14303	0	KITLG KIT
regulation of osteoblast differentiation	Reg. of osteoblast diff.	1.2364e-05	0.00031759	4/42	0.095	49/14303	0.003	BMP4 IL6 HGF IL6R
positive regulation of osteoblast differentiation	(+) Reg. osteoblast diff.	1.0731e-06	6.3009e-05	4/42	0.095	27/14303	0.001	BMP4 IL6 HGF IL6R
positive regulation of smooth muscle cell proliferation	(+) Reg. smooth muscle cell prolif.	1.6651e-06	8.9263e-05	4/42	0.095	30/14303	0.002	BMP4 IL6 HGF IL6R
endocrine system development	Endocrine system devel.	7.8264e-05	0.0010158	4/42	0.095	78/14303	0.005	BMP4 IL6 HGF IL6R
cell development	Cell development	1.078e-05	0.0003071	10/42	0.238	632/14303	0.044	BMP4 IL6 KRT19 KITLG HGF KIT TNC ADM PTX3 PVRL2
reproduction	Reproduction	9.0062e-05	0.0011105	10/42	0.238	810/14303	0.056	BMP4 PDGFRA ACE2 KITLG MSTN IGFBP2 KIT TNC ADM PVRL2
reproductive process	Reproductive process	8.7315e-05	0.0010986	10/42	0.238	807/14303	0.056	BMP4 PDGFRA ACE2 KITLG MSTN IGFBP2 KIT TNC ADM PVRL2
positive regulation of anti-apoptosis	(+) Reg. anti-apoptosis	2.7939e-06	0.00012559	4/42	0.095	34/14303	0.002	IL6 HGF ADM IL6R
endocrine pancreas development	Endocrine pancreas devel.	2.5924e-05	0.00050881	3/42	0.071	20/14303	0.001	IL6 HGF IL6R
developmental programmed cell death	Devel. programmed cell death	0.00023308	0.0020097	2/42	0.047	8/14303	0	KITLG KIT
germ cell programmed cell death	Germ cell programmed death	2.5207e-05	0.00050881	2/42	0.047	3/14303	0	KITLG KIT
regulation of developmental pigmentation	Reg. devel. pigmentation	0.00045528	0.0031187	2/42	0.047	11/14303	0	KITLG KIT
cell differentiation	Cell diff.	0.00018091	0.0017239	14/42	0.333	1668/14303	0.116	NTRK2 PDGFRA IL15 HGF TNC ADM BMP4 IL6 KRT19 KITLG CDH2 KIT PTX3 PVRL2
cellular developmental process	Cellular develop. process	0.00024169	0.0020695	14/42	0.333	1714/14303	0.119	NTRK2 PDGFRA IL15 HGF TNC ADM BMP4 IL6 KRT19 KITLG CDH2 KIT PTX3 PVRL2
multicellular organismal development	Multicell. organismal devel.	2.4112e-05	0.00050881	21/42	0.5	2971/14303	0.207	NTRK2 PDGFRA MSTN IL15 HGF TNC ADM GFRA1 PTN PTS RGMA COMP BMP4 IL6 KRT19 KITLG CDH2 KIT PTX3 IL6R MATN3
system development	System devel.	8.1555e-07	5.0286e-05	21/42	0.5	2421/14303	0.169	NTRK2 PDGFRA MSTN IL15 HGF TNC ADM GFRA1 PTN PTS RGMA COMP BMP4 IL6 KRT19 KITLG CDH2 KIT PTX3 IL6R MATN3
positive regulation of cell differentiation	(+) Reg. cell diff.	9.4737e-05	0.0011565	6/42	0.142	256/14303	0.017	BMP4 IL6 KITLG HGF KIT IL6R
anatomical structure development	Anatomical devel.	8.1567e-07	5.0286e-05	22/42	0.523	2655/14303	0.185	NTRK2 PDGFRA MSTN IL15 HGF TNC ADM GFRA1 PTN PTS RGMA COMP BMP4 IL6 KRT19 KITLG CDH2 KIT PTX3 IL6R PVRL2 MATN3
development of primary male sexual characteristics	Dev. primary male sexual character.	0.0014261	0.007296	3/42	0.071	76/14303	0.005	PDGFRA KITLG KIT
development of primary sexual characteristics	Develop. primary sexual character.	0.00086278	0.0050371	4/42	0.095	146/14303	0.01	BMP4 PDGFRA KITLG KIT
developmental process	Developmental process	6.0245e-06	0.00021224	23/42	0.547	3234/14303	0.226	NTRK2 PDGFRA MSTN IL15 HGF IGFBP2 TNC ADM GFRA1 PTN PTS RGMA COMP BMP4 IL6 KRT19 KITLG CDH2 KIT PTX3 IL6R PVRL2 MATN3
hemopoietic progenitor cell differentiation	Hemopoietic progenitor cell differ.	0.00098414	0.0055408	2/42	0.047	16/14303	0.001	BMP4 KIT
nervous system development	Nervous system devel.	1.6262e-05	0.00037832	13/42	0.309	1156/14303	0.08	NTRK2 PDGFRA HGF ADM GFRA1 PTN PTS RGMA BMP4 IL6 CDH2 KIT PTX3
regulation of cell proliferation	Reg. cell prolif.	3.738e-06	0.00015893	12/42	0.285	849/14303	0.059	BMP4 PDGFRA ACE2 IL6 KITLG IL15 HGF KIT ADM PRTN3 PTN IL6R
regulation of cellular process	Reg. cellular process	0.0020496	0.0095366	28/42	0.666	6221/14303	0.434	MSTN TNC ADM PTN AREG COMP IL1RL1 CDH2 CCL7 IL6R NTRK2 PDGFRA IL15 HGF IGFBP2 TNFRSF10B IL17RB BMP4 ACE2 IL6 KITLG KIT PRTN3 PTX3 PVRL2 SKAP1 IL18R1 ANGPTL1
organ development	Organ development	4.8946e-06	0.00019001	17/42	0.404	1791/14303	0.125	PDGFRA MSTN IL15 HGF TNC ADM PTN RGMA COMP BMP4 IL6 KRT19 KITLG CDH2 KIT PTX3 IL6R
regulation of cell differentiation	Reg. cell diff.	0.00017738	0.0017086	8/42	0.19	554/14303	0.038	BMP4 IL6 KITLG CDH2 IL15 HGF KIT IL6R
regulation of smooth muscle cell proliferation	Reg. smooth muscle cell prolif.	1.9125e-07	2.1437e-05	5/42	0.119	45/14303	0.003	BMP4 IL6 IL15 HGF IL6R
